# Supplementary material
Source: publisher figshare collection journal article supplement (https://gsajournals.figshare.com/ndownloader/files/26606783)
Supplement: Supplementary file 1 [file 26606783]

## Sheet: Table S2
Table S3. Genes identifyed by mRNA-seq
	Genes upregulated at day-0 after Pe infection (log2 fold change >1, p.adjst <0.05) are highlighted in blue
	Genes downregulated at day-0 after Pe infection (log2 fold change <-1, p.adjst <0.05) are highlighted in green
	Genes upregulated at day-3 after Pe infection (log2 fold change >1, log2 fold change_Pe day-0 < log2 fold change_Pe day-3, p.adjst <0.05) are highlighted in pink
			day-0 after Pe infection					day-3 after Pe infection
Gene ID	Gene Symbol	Base Mean	log2 Fold Change	lfcSE	Stat	p-value	p.adjust	log2 Fold Change	lfcSE	Stat	p-value	p.adjust
FBgn0000008	a	61.9799	1.26747	0.405735	3.12388	0.00178485	0.00500807	0.384463	0.424856	0.904925	0.365505	0.651041
FBgn0000014	abd-A	51.635	-0.774996	0.380989	-2.03417	0.0419349	0.0832529	-0.243435	0.383698	-0.634445	0.52579	0.777052
FBgn0000015	Abd-B	4.96112	-0.655981	1.15024	-0.570298	0.568476	0.671336	-0.733769	1.20453	-0.609177	0.542407	NA
FBgn0000017	Abl	474.939	0.543416	0.165924	3.27508	0.00105631	0.00309159	-0.0281536	0.171053	-0.16459	0.869267	0.957185
FBgn0000018	abo	259.643	0.284013	0.190406	1.49161	0.1358	0.219908	0.240127	0.195298	1.22954	0.218869	0.496032
FBgn0000022	ac	0	NA	NA	NA	NA	NA	NA	NA	NA	NA	NA
FBgn0000024	Ace	255.213	-1.35879	0.200367	-6.78152	1.18919e-11	9.46345e-11	0.514189	0.189262	2.71681	0.00659138	0.0397491
FBgn0000028	acj6	9.33634	-0.44552	0.972903	-0.457929	0.647004	0.739568	-0.316381	0.996241	-0.317575	0.750807	NA
FBgn0000032	Acph-1	394.2	0.00556142	0.182503	0.030473	0.97569	0.984691	0.190041	0.18495	1.02753	0.304173	0.592204
FBgn0000036	nAChRalpha1	0	NA	NA	NA	NA	NA	NA	NA	NA	NA	NA
FBgn0000037	mAChR-A	2.22794	-0.345596	1.75864	-0.196513	0.844209	0.891941	-1.45571	1.96592	-0.74047	0.459015	NA
FBgn0000038	nAChRbeta1	0.832836	1.30141	3.50718	0.37107	0.710585	NA	3.02934	3.33811	0.9075	0.364142	NA
FBgn0000039	nAChRalpha2	0.116502	0.640197	4.99719	0.128111	0.898061	NA	0	4.99745	0	1	NA
FBgn0000042	Act5C	92403.3	0.0305934	0.160387	0.190747	0.848724	0.894942	-0.0834761	0.160405	-0.520408	0.60278	0.826445
FBgn0000043	Act42A	5465.07	2.44962	0.192997	12.6925	6.50448e-37	2.06731e-35	0.604998	0.193833	3.12123	0.00180098	0.0142773
FBgn0000044	Act57B	1699.27	-1.12476	0.194191	-5.79202	6.9546e-09	4.23924e-08	0.252333	0.193417	1.30461	0.192027	0.457695
FBgn0000045	Act79B	142.779	-0.296633	0.266491	-1.11311	0.265663	0.377294	-0.288992	0.273286	-1.05747	0.290296	0.578253
FBgn0000046	Act87E	511.627	-1.09357	0.269526	-4.05737	4.96279e-05	0.000182902	-0.0203754	0.268556	-0.0758702	0.939522	0.983575
FBgn0000047	Act88F	1.15753	0.773676	2.82309	0.274053	0.784044	NA	1.52896	2.82183	0.541835	0.587932	NA
FBgn0000052	ade2	852.899	-0.613746	0.152458	-4.02567	5.6813e-05	0.000207033	-0.501446	0.15429	-3.25003	0.00115394	0.0101118
FBgn0000053	ade3	396.25	-0.424216	0.199574	-2.12561	0.0335359	0.0685562	-0.0975683	0.200513	-0.486594	0.626546	0.839838
FBgn0000055	Adh	4505.76	-2.83103	0.23729	-11.9307	8.19139e-33	2.12833e-31	-1.65203	0.236989	-6.97091	3.149e-12	2.94237e-10
FBgn0000056	Adhr	72.1574	-2.61593	0.403216	-6.48766	8.71796e-11	6.40776e-10	-1.40201	0.39211	-3.57556	0.000349481	0.00378422
FBgn0000057	adp	332.34	-0.706032	0.182071	-3.87777	0.000105417	0.000368517	0.0455434	0.181959	0.250294	0.80236	0.930329
FBgn0000061	al	0.923875	0	4.99745	0	1	NA	3.62672	4.8302	0.750842	0.452748	NA
FBgn0000063	Mps1	20.6691	0.515639	0.586642	0.878967	0.379419	0.494644	0.650426	0.601277	1.08174	0.279368	NA
FBgn0000064	Ald	11908.7	-0.746728	0.0951109	-7.85113	4.12314e-15	4.25539e-14	-0.27274	0.0951607	-2.8661	0.00415563	0.0277131
FBgn0000071	Ama	0.621175	-2.2757	4.6615	-0.48819	0.625415	NA	0.971183	4.54335	0.213759	0.830735	NA
FBgn0000075	amd	4.71471	1.59666	1.19067	1.34097	0.179929	0.276914	-0.783701	1.42467	-0.550094	0.582255	NA
FBgn0000077	amx	190.319	0.0535261	0.218155	0.245358	0.806179	0.865381	0.23191	0.222515	1.04222	0.297309	0.585982
FBgn0000078	Amy-d	715.777	-0.892216	0.551416	-1.61805	0.105653	0.179039	1.20344	0.550052	2.18787	0.0286794	0.124868
FBgn0000079	Amy-p	64840.8	0.0682143	0.17471	0.390443	0.696209	0.780719	-0.285206	0.174743	-1.63214	0.10265	0.310768
FBgn0000083	AnxB9	2469.59	0.814505	0.13896	5.86144	4.58861e-09	2.85908e-08	0.220065	0.140171	1.56998	0.11642	0.336161
FBgn0000084	AnxB10	567.308	1.20808	0.145995	8.27482	1.28648e-16	1.46766e-15	0.502631	0.151096	3.32657	0.000879204	0.00809685
FBgn0000092	CG2650	7.82897	1.35461	0.966602	1.40142	0.161089	0.253091	0.403277	1.03182	0.39084	0.695916	NA
FBgn0000094	Anp	1.30652	4.12239	3.19014	1.29223	0.196278	0.297191	0	3.47431	0	1	NA
FBgn0000097	aop	981.193	0.674738	0.18732	3.60207	0.000315695	0.00101423	0.454314	0.188841	2.40581	0.0161368	0.0806451
FBgn0000100	RpLP0	33010.8	-1.05583	0.0952941	-11.0797	1.57336e-28	3.33713e-27	-0.379818	0.0953031	-3.98537	6.73747e-05	0.000940101
FBgn0000108	Appl	127.859	-1.61189	0.263423	-6.11902	9.41522e-10	6.29276e-09	-0.126065	0.252978	-0.498324	0.618256	0.834918
FBgn0000109	Aprt	358.215	-0.177486	0.166169	-1.0681	0.285474	0.398245	-0.124441	0.170076	-0.731682	0.464363	0.736533
FBgn0000114	bru1	19.5491	-2.10072	0.812318	-2.58608	0.00970748	0.0230553	-0.491583	0.767558	-0.64045	0.52188	NA
FBgn0000115	Arl1	1019.51	-0.290365	0.164318	-1.76709	0.0772127	0.138956	-0.220048	0.165696	-1.32802	0.184172	0.446655
FBgn0000116	Argk	34686.6	-0.496573	0.132123	-3.75843	0.000170986	0.000578092	0.158402	0.132131	1.19883	0.230594	0.509796
FBgn0000117	arm	3923.14	-0.304417	0.0903106	-3.37077	0.000749573	0.0022561	0.155189	0.0905738	1.71339	0.0866401	0.275631
FBgn0000119	arr	596.115	-0.690961	0.18352	-3.76504	0.000166523	0.000563554	0.00280054	0.183659	0.0152486	0.987834	0.997092
FBgn0000120	Arr1	27.9377	3.13048	3.1475	0.994594	0.319934	0.434484	5.32712	3.14179	1.69557	0.0899681	0.283078
FBgn0000121	Arr2	22.1508	0.174997	2.36375	0.0740336	0.940984	0.961658	6.71603	2.13666	3.14323	0.00167093	0.013399
FBgn0000137	ase	2.03059	4.45276	2.24868	1.98016	0.0476853	0.0929296	2.37469	2.43904	0.973617	0.330247	NA
FBgn0000139	ash2	658.587	-0.302862	0.156936	-1.92984	0.0536267	0.102774	0.447017	0.157229	2.84309	0.00446778	0.0294173
FBgn0000140	asp	33.8787	1.11296	0.558399	1.99313	0.0462469	0.0905167	0.552724	0.578108	0.956091	0.339026	0.627274
FBgn0000146	aub	14.4914	0.878248	0.67112	1.30863	0.190659	0.29012	-0.605825	0.753008	-0.80454	0.421085	NA
FBgn0000147	aurA	16.4113	0.927533	0.681787	1.36044	0.173689	0.269106	-0.0675537	0.731224	-0.0923844	0.926393	NA
FBgn0000150	awd	9394.7	-0.295694	0.144288	-2.04933	0.0404294	0.0807937	-0.449116	0.144526	-3.10751	0.00188669	0.0148436
FBgn0000152	Axs	63.8422	0.0810867	0.353877	0.229138	0.818762	0.874282	0.323151	0.360778	0.895704	0.370411	0.654833
FBgn0000153	b	4.01194	-0.719946	1.31359	-0.548077	0.583639	0.685397	-0.585715	1.35469	-0.432359	0.66548	NA
FBgn0000157	Dll	0.847177	0.213177	3.04248	0.0700669	0.94414	NA	0.695941	3.04894	0.228257	0.819447	NA
FBgn0000158	bam	0.701759	-0.789319	3.25912	-0.242188	0.808635	NA	0.937297	3.09557	0.302786	0.762053	NA
FBgn0000163	baz	1113.19	0.668506	0.209264	3.19455	0.00140047	0.00400635	0.226682	0.21084	1.07514	0.282314	0.569974
FBgn0000166	bcd	2.82285	-0.508326	2.03586	-0.249687	0.80283	0.863123	-1.35704	2.13144	-0.636679	0.524334	NA
FBgn0000173	ben	2336.21	-0.37947	0.138536	-2.73914	0.00615998	0.0154044	0.166167	0.138604	1.19886	0.230583	0.509796
FBgn0000179	bi	2.33942	-1.91101	1.63111	-1.1716	0.241358	0.349352	-1.44873	1.6329	-0.887216	0.374962	NA
FBgn0000180	bib	91.9202	0.691393	0.284406	2.431	0.0150571	0.0340934	0.566052	0.293774	1.92683	0.054001	0.198004
FBgn0000181	bic	10486.6	-0.646783	0.0829742	-7.79499	6.44133e-15	6.59554e-14	-0.586312	0.0832695	-7.04114	1.9067e-12	1.82254e-10
FBgn0000182	BicC	26.4648	-3.187	0.934418	-3.41068	0.000648006	0.00197383	-0.444244	0.863674	-0.514365	0.606997	0.828321
FBgn0000183	BicD	1639.6	0.193824	0.115709	1.6751	0.0939149	0.162866	0.369378	0.116616	3.16749	0.00153763	0.0126104
FBgn0000206	boss	0.512111	-1.76961	4.84787	-0.365028	0.71509	NA	-2.47289	4.84791	-0.510095	0.609985	NA
FBgn0000212	brm	960.711	-0.034611	0.127371	-0.271734	0.785827	0.850385	-0.189842	0.129852	-1.46199	0.143745	0.383134
FBgn0000216	Brd	0	NA	NA	NA	NA	NA	NA	NA	NA	NA	NA
FBgn0000221	brn	150.793	0.0300404	0.244627	0.122801	0.902265	0.936093	0.00331275	0.25139	0.0131777	0.989486	0.997092
FBgn0000227	Bsg25A	0.392466	-3.19461	4.89598	-0.652498	0.51408	NA	-2.46142	4.89598	-0.502742	0.615145	NA
FBgn0000228	Bsg25D	687.961	0.00416916	0.145346	0.0286843	0.977116	0.985493	0.117001	0.147223	0.794719	0.426777	0.705331
FBgn0000229	bsk	1116.54	0.0751876	0.116466	0.645575	0.518555	0.627543	0.293004	0.117689	2.48964	0.0127871	0.0668792
FBgn0000233	btd	0.116502	0.640197	4.99719	0.128111	0.898061	NA	0	4.99745	0	1	NA
FBgn0000239	bur	1472.15	0.309594	0.119221	2.5968	0.00940978	0.0224405	0.0403394	0.121049	0.333249	0.738946	0.902626
FBgn0000241	bw	18.9659	0.181678	0.611284	0.297208	0.766308	0.836755	0.688781	0.617191	1.11599	0.264426	NA
FBgn0000244	by	1663.57	-0.540224	0.117995	-4.57836	4.68638e-06	2.00434e-05	0.204994	0.117967	1.73772	0.0822599	0.26628
FBgn0000246	c(3)G	131.684	2.98606	0.299879	9.95753	2.3381e-23	3.90047e-22	0.287959	0.335798	0.857538	0.391147	0.671646
FBgn0000247	ca	837.34	-0.260355	0.122081	-2.13264	0.0329543	0.0676331	0.226728	0.122894	1.8449	0.0650515	0.226726
FBgn0000250	cact	1659.01	0.842778	0.146289	5.76104	8.35981e-09	5.0344e-08	0.23887	0.147931	1.61474	0.106368	0.31746
FBgn0000251	cad	1317.52	0.600642	0.148425	4.04678	5.19269e-05	0.000190545	-0.351116	0.151375	-2.31951	0.0203673	0.0968961
FBgn0000253	Cam	21616.5	-0.285913	0.123822	-2.30907	0.0209397	0.045481	0.183398	0.123853	1.48078	0.138666	0.373428
FBgn0000256	capu	1994.21	-0.340888	0.189197	-1.80176	0.0715832	0.130645	0.149793	0.189485	0.790526	0.429221	0.707512
FBgn0000257	car	465.248	0.310841	0.153536	2.02454	0.0429141	0.0848817	0.122265	0.157569	0.775949	0.437779	0.714258
FBgn0000259	CkIIbeta	2174.58	-0.0934261	0.102296	-0.913293	0.361088	0.476545	-0.0687079	0.103348	-0.664822	0.506164	0.763763
FBgn0000261	Cat	8194.22	0.473241	0.0859236	5.5077	3.63561e-08	2.02817e-07	0.0418846	0.0864509	0.484489	0.628039	0.840021
FBgn0000273	Pka-C1	1606.94	-0.842876	0.112086	-7.51992	5.48107e-14	5.21655e-13	0.20134	0.111397	1.80742	0.0706976	0.239772
FBgn0000274	Pka-C2	0	NA	NA	NA	NA	NA	NA	NA	NA	NA	NA
FBgn0000276	CecA1	2.30606	3.33927	2.29222	1.45679	0.145175	0.23284	-1.53223	2.68696	-0.570245	0.568512	NA
FBgn0000277	CecA2	1.791	2.75285	2.33339	1.17977	0.238094	0.345795	-0.102454	2.70357	-0.037896	0.969771	NA
FBgn0000278	CecB	0.392466	-3.19461	4.89598	-0.652498	0.51408	NA	-2.46142	4.89598	-0.502742	0.615145	NA
FBgn0000279	CecC	0.525514	-1.80917	3.86301	-0.468333	0.639547	NA	-2.51512	3.86317	-0.651052	0.515013	NA
FBgn0000280	Cec-Psi1	0	NA	NA	NA	NA	NA	NA	NA	NA	NA	NA
FBgn0000281	Cec2	0	NA	NA	NA	NA	NA	NA	NA	NA	NA	NA
FBgn0000283	Cp190	1334.43	0.0660809	0.120263	0.549471	0.582683	0.68466	0.0360222	0.121825	0.295689	0.767468	0.915413
FBgn0000286	Cf2	590.572	-0.0109721	0.139087	-0.0788869	0.937123	0.95919	0.158808	0.141238	1.1244	0.260843	0.547252
FBgn0000287	salr	0.805073	-3.84681	3.34082	-1.15146	0.249544	NA	-1.68894	3.33496	-0.506436	0.61255	NA
FBgn0000289	cg	1282.86	0.463539	0.149659	3.09729	0.00195296	0.0054343	-0.0331821	0.151577	-0.218912	0.826718	0.941753
FBgn0000299	Col4a1	157.783	-0.996183	0.489723	-2.03418	0.0419337	0.0832529	-0.592754	0.491431	-1.20618	0.227748	0.5066
FBgn0000303	ChAT	5.97971	0.591737	1.1645	0.508147	0.61135	0.708967	0.78323	1.18505	0.660924	0.508661	NA
FBgn0000307	chif	443.537	-0.197075	0.195929	-1.00585	0.31449	0.42916	-0.0958983	0.198516	-0.483077	0.629041	0.840616
FBgn0000308	chic	12429.9	0.430672	0.106342	4.0499	5.12401e-05	0.000188243	0.214518	0.106562	2.01308	0.0441062	0.171156
FBgn0000316	cin	695.772	-0.128818	0.137773	-0.934997	0.34979	0.465178	-0.00763686	0.139896	-0.0545895	0.956465	0.989153
FBgn0000317	ck	704.085	-0.547945	0.251606	-2.17779	0.0294218	0.0613649	0.0251659	0.251971	0.0998761	0.920443	0.976261
FBgn0000318	cl	3700.95	-0.311755	0.089946	-3.46602	0.000528222	0.00163875	-0.394196	0.0908385	-4.33952	1.42792e-05	0.000254274
FBgn0000319	Chc	8974.64	0.228785	0.12374	1.84892	0.0644688	0.119926	0.288142	0.123931	2.32501	0.0200713	0.0959821
FBgn0000320	eya	1.39284	-3.20239	3.03976	-1.0535	0.292113	0.405114	1.3327	2.75046	0.484538	0.628004	NA
FBgn0000326	clt	537.881	-0.328034	0.166341	-1.97206	0.0486028	0.094363	0.398503	0.166463	2.39395	0.0166679	0.0827032
FBgn0000330	cm	321.721	-0.0761809	0.169819	-0.4486	0.65372	0.744805	0.0919379	0.173217	0.530767	0.59558	0.821912
FBgn0000337	cn	4.35673	1.27939	1.2419	1.03019	0.302923	0.41677	0.927448	1.29616	0.715535	0.474279	NA
FBgn0000339	cni	2015.51	-0.320513	0.112553	-2.84765	0.00440434	0.0113838	-0.165228	0.11343	-1.45665	0.145213	0.385934
FBgn0000346	comt	15.1144	0.0630611	0.68061	0.0926537	0.926179	0.952667	-0.145605	0.71085	-0.204832	0.837704	NA
FBgn0000351	cort	8.88432	0.0139143	0.843733	0.0164914	0.986842	0.992228	-0.866859	0.922669	-0.939513	0.347468	NA
FBgn0000352	cos	145.008	-0.445132	0.266797	-1.66843	0.0952303	0.164379	-0.255573	0.271775	-0.940384	0.34702	0.635224
FBgn0000355	Cp15	7.65502	0.788968	1.39842	0.564187	0.572627	0.675748	2.736	1.36247	2.00811	0.0446312	NA
FBgn0000356	Cp16	1.97996	-4.60069	3.36516	-1.36715	0.171577	0.266507	-0.155226	3.11082	-0.0498987	0.960203	NA
FBgn0000357	Cp18	12.4654	-0.590855	0.927577	-0.636988	0.524133	0.632379	0.205527	0.925411	0.222093	0.824242	NA
FBgn0000358	Cp19	0.395977	-2.26876	4.99187	-0.454492	0.649475	NA	-0.10384	4.98857	-0.0208156	0.983393	NA
FBgn0000359	Cp36	2.5815	0.406104	1.98118	0.204981	0.837587	0.887358	0.887157	1.99578	0.444517	0.656669	NA
FBgn0000360	Cp38	3.21767	-0.674518	2.00208	-0.336909	0.736186	0.812831	1.94426	1.87213	1.03853	0.299024	NA
FBgn0000370	crc	14190.2	-0.169968	0.146287	-1.16188	0.245284	0.353716	-0.1995	0.146415	-1.36257	0.173019	0.432182
FBgn0000376	crm	186.195	-0.608797	0.234896	-2.59177	0.00954841	0.022719	-0.335376	0.23892	-1.40371	0.160404	0.409262
FBgn0000377	crn	530.767	0.162602	0.150204	1.08254	0.279012	0.391544	0.111654	0.153341	0.728142	0.466527	0.738275
FBgn0000382	csw	531.996	-0.245543	0.141864	-1.73083	0.083482	0.147984	0.0834571	0.143639	0.581021	0.561227	0.802193
FBgn0000384	cta	604.378	0.160038	0.132517	1.20768	0.22717	0.332954	0.122102	0.13546	0.901388	0.367382	0.651973
FBgn0000394	cv	94.1545	0.330942	0.305692	1.0826	0.278986	0.391544	-0.146913	0.320603	-0.45824	0.64678	0.85243
FBgn0000395	cv-2	1063.04	4.70377	0.209182	22.4865	5.62528e-112	9.42961e-110	1.23688	0.219657	5.63097	1.79199e-08	6.99634e-07
FBgn0000404	CycA	154.827	1.43602	0.261805	5.48509	4.13248e-08	2.29796e-07	-0.0117349	0.278644	-0.0421143	0.966408	0.99058
FBgn0000405	CycB	128.273	0.43318	0.426815	1.01491	0.310148	0.424406	-0.363936	0.436426	-0.833901	0.404337	0.684123
FBgn0000406	Cyt-b5-r	291.185	-0.51954	0.401702	-1.29335	0.195891	0.296648	0.133996	0.402011	0.333314	0.738897	0.902626
FBgn0000411	D	1.49051	-0.502327	2.6083	-0.192588	0.847282	0.89399	-3.62188	2.91006	-1.24461	0.213276	NA
FBgn0000412	D1	1287.95	0.0265525	0.114035	0.232845	0.815882	0.872193	-0.140677	0.116072	-1.21197	0.225523	0.503891
FBgn0000414	Dab	66.4844	-1.25249	0.361678	-3.46298	0.000534222	0.00165588	-0.17001	0.356378	-0.477049	0.633327	0.843219
FBgn0000416	Sap-r	21970.5	-0.923416	0.133134	-6.93597	4.0344e-12	3.35168e-11	0.361224	0.133065	2.71464	0.00663476	0.0398472
FBgn0000422	Ddc	7.09749	2.02197	1.06779	1.8936	0.0582782	0.110225	-0.0355488	1.22629	-0.0289888	0.976874	NA
FBgn0000426	SmF	253.566	0.78799	0.186264	4.23049	2.33181e-05	9.01245e-05	-0.592774	0.202353	-2.92941	0.00339605	0.0236727
FBgn0000427	dec-1	1.22677	0	4.67852	0	1	NA	4.03025	4.48755	0.898095	0.369135	NA
FBgn0000439	Dfd	12.9755	7.43583	1.63602	4.54508	5.49149e-06	2.32856e-05	0	2.17696	0	1	NA
FBgn0000442	Pkg21D	110.286	-0.800121	0.303366	-2.63748	0.00835254	0.0202208	0.0550498	0.302015	0.182275	0.855367	0.951728
FBgn0000447	Dhod	849.709	-0.0774337	0.121664	-0.636455	0.52448	0.632577	-0.286852	0.124826	-2.29801	0.0215611	0.100732
FBgn0000448	Hr3	15.3458	3.05594	0.805931	3.79181	0.000149552	0.000509938	0.709466	0.878295	0.807776	0.419219	NA
FBgn0000449	dib	0.907707	-0.798279	3.08776	-0.25853	0.795998	NA	1.54162	2.85291	0.540368	0.588943	NA
FBgn0000451	ect	25.7809	-2.54133	0.564808	-4.49945	6.81287e-06	2.8482e-05	-0.832165	0.522368	-1.59306	0.111146	0.32672
FBgn0000454	Dip-B	8135.57	-0.289926	0.0902361	-3.21298	0.00131367	0.00378409	-0.22871	0.0905692	-2.52526	0.0115614	0.0619915
FBgn0000455	Dip-C	3727.01	-0.994255	0.107579	-9.24213	2.41644e-20	3.41688e-19	-0.0269253	0.107362	-0.25079	0.801977	0.930159
FBgn0000459	disco	31.4828	0.0402404	0.453499	0.088733	0.929294	0.954464	0.111371	0.468296	0.237821	0.81202	0.934379
FBgn0000463	Dl	118.157	1.64404	0.26955	6.09919	1.06606e-09	7.09318e-09	0.377628	0.288313	1.30979	0.190268	0.455462
FBgn0000464	Lar	372.293	-0.0629607	0.173454	-0.362981	0.716619	0.796729	0.0898456	0.176559	0.50887	0.610843	0.830633
FBgn0000473	Cyp6a2	4834.69	-2.84803	0.130363	-21.847	8.30561e-106	1.19889e-103	0.116307	0.127903	0.909337	0.363172	0.649074
FBgn0000477	DNaseII	26.1401	-2.74167	0.830279	-3.30211	0.000959598	0.00283166	-1.40067	0.810691	-1.72775	0.0840332	0.270441
FBgn0000479	dnc	982.521	-1.60629	0.17125	-9.37978	6.61115e-21	9.51657e-20	-0.434843	0.170133	-2.55589	0.0105916	0.057644
FBgn0000482	dor	421.937	0.050759	0.162811	0.311766	0.755218	0.827428	0.30215	0.16506	1.83055	0.0671678	0.231575
FBgn0000489	Pka-C3	90.954	-1.1605	0.306118	-3.79104	0.000150018	0.000511026	-0.288482	0.304023	-0.948882	0.34268	0.63089
FBgn0000490	dpp	226.788	-1.37835	0.222621	-6.19146	5.9608e-10	4.07034e-09	-1.12122	0.226645	-4.94702	7.53598e-07	1.9895e-05
FBgn0000492	Dr	26.893	4.58579	0.929259	4.93488	8.01985e-07	3.79901e-06	0.383073	1.07465	0.356462	0.721495	0.893756
FBgn0000499	dsh	388.169	0.660799	0.156944	4.21043	2.54889e-05	9.80044e-05	0.128019	0.163329	0.783811	0.433151	0.71075
FBgn0000500	Dsk	1.00648	-2.28932	3.36656	-0.680019	0.496493	NA	1.90632	3.1243	0.610157	0.541758	NA
FBgn0000504	dsx	662.269	-0.909984	0.18424	-4.93913	7.84738e-07	3.7258e-06	-0.264123	0.184718	-1.42987	0.152755	0.39722
FBgn0000520	dwg	232.166	0.108199	0.206759	0.523313	0.600757	0.700276	-0.0773771	0.213007	-0.363261	0.71641	0.891675
FBgn0000524	dx	157.599	-0.0710811	0.221561	-0.32082	0.748347	0.821893	-0.211349	0.229901	-0.919305	0.357936	0.645962
FBgn0000527	e	1.88339	1.33142	2.18473	0.609423	0.542244	0.648583	-0.0514066	2.35558	-0.0218234	0.982589	NA
FBgn0000529	bsh	59.6602	2.88834	0.442028	6.5343	6.39072e-11	4.77833e-10	0.51467	0.486276	1.05839	0.289878	0.57815
FBgn0000533	ea	5.25152	0.612307	1.19177	0.513778	0.607407	0.705575	0.843594	1.21556	0.693996	0.487685	NA
FBgn0000535	eag	4.36119	0.81164	1.29616	0.626189	0.531191	0.638597	0.125776	1.39759	0.0899946	0.928292	NA
FBgn0000536	eas	4523.87	-1.60989	0.191279	-8.41644	3.8811e-17	4.50685e-16	0.0871258	0.190783	0.456676	0.647904	0.853202
FBgn0000541	E(bx)	1301.24	-0.175805	0.139392	-1.26123	0.207225	0.30926	-0.0931245	0.140664	-0.662033	0.50795	0.764545
FBgn0000542	ec	4.67917	-0.916738	1.18069	-0.77644	0.437489	0.551866	-1.34489	1.27602	-1.05397	0.291895	NA
FBgn0000543	ecd	435.138	0.391501	0.166842	2.34654	0.0189487	0.0415471	0.0829943	0.171382	0.484265	0.628198	0.840021
FBgn0000546	EcR	246.054	0.235532	0.199805	1.17881	0.238474	0.34609	-0.135375	0.206824	-0.654544	0.512761	0.768758
FBgn0000547	ed	112.363	-0.415469	0.272529	-1.5245	0.127385	0.209248	-0.0904088	0.277035	-0.326345	0.744164	0.905693
FBgn0000551	Edg78E	2.55792	-0.381344	1.47496	-0.258545	0.795986	0.858046	-1.65501	1.71934	-0.962586	0.335755	NA
FBgn0000552	Edg84A	0	NA	NA	NA	NA	NA	NA	NA	NA	NA	NA
FBgn0000557	eEF1alpha2	14.1672	-1.98945	0.812101	-2.44976	0.0142952	0.0325526	-0.106825	0.760072	-0.140546	0.888229	NA
FBgn0000559	eEF2	82225	-0.650875	0.123723	-5.26074	1.43475e-07	7.57691e-07	-0.142205	0.123732	-1.1493	0.250433	0.533812
FBgn0000560	eg	0	NA	NA	NA	NA	NA	NA	NA	NA	NA	NA
FBgn0000562	egl	1713.36	0.03648	0.124325	0.293424	0.769198	0.839117	0.325111	0.124985	2.6012	0.00928991	0.0519825
FBgn0000564	Eh	0	NA	NA	NA	NA	NA	NA	NA	NA	NA	NA
FBgn0000565	Eip71CD	1921.48	-3.00881	0.13992	-21.5037	1.43624e-102	1.96406e-100	-0.699371	0.135755	-5.15171	2.58126e-07	7.74936e-06
FBgn0000566	Eip55E	2632.58	-0.565446	0.149275	-3.78795	0.000151896	0.00051679	-0.454381	0.14988	-3.03163	0.00243238	0.0181577
FBgn0000567	Eip74EF	378.449	0.39638	0.181123	2.18846	0.0286358	0.0599541	0.0476373	0.186017	0.256091	0.79788	0.928646
FBgn0000568	Eip75B	2302.98	1.28913	0.1946	6.62451	3.48405e-11	2.65662e-10	0.146675	0.19593	0.748606	0.454094	0.728303
FBgn0000575	emc	651.031	-0.0382205	0.207765	-0.18396	0.854045	0.898662	-0.286739	0.210192	-1.36417	0.172513	0.431204
FBgn0000576	ems	3.5788	-1.36905	1.37314	-0.997016	0.318757	0.433504	-3.64057	1.91057	-1.90549	0.0567169	NA
FBgn0000577	en	0.11735	0.645466	4.99681	0.129176	0.897219	NA	0	4.99745	0	1	NA
FBgn0000578	ena	467.434	1.58071	0.160733	9.83438	8.00598e-23	1.27227e-21	0.518773	0.167672	3.09398	0.0019749	0.0153488
FBgn0000579	Eno	7567.36	-0.253853	0.133618	-1.89985	0.0574529	0.108882	-0.163456	0.133842	-1.22126	0.221986	0.500717
FBgn0000581	E(Pc)	1093.46	-0.396376	0.158279	-2.50429	0.0122696	0.0283814	-0.139931	0.159237	-0.878759	0.379532	0.661212
FBgn0000588	esc	56.9458	1.15185	0.351463	3.2773	0.00104806	0.0030709	0.0207603	0.381066	0.0544796	0.956553	0.989153
FBgn0000591	E(spl)m8-HLH	0.467705	2.6417	4.82042	0.548021	0.583677	NA	0	4.9797	0	1	NA
FBgn0000592	Est-6	41.0476	-4.3439	1.00547	-4.32027	1.55836e-05	6.20774e-05	-3.12409	0.985961	-3.16858	0.00153188	0.0125803
FBgn0000594	Est-P	1.72505	3.96389	2.65931	1.49057	0.136073	0.220248	2.90632	2.75414	1.05526	0.291308	NA
FBgn0000606	eve	0.116502	0.640197	4.99719	0.128111	0.898061	NA	0	4.99745	0	1	NA
FBgn0000611	exd	1758.36	-0.551868	0.102929	-5.36161	8.24819e-08	4.46012e-07	0.00981112	0.103191	0.0950776	0.924253	0.976631
FBgn0000615	exu	302.08	1.27084	0.184756	6.87846	6.0501e-12	4.95498e-11	0.135421	0.195283	0.69346	0.488021	0.754924
FBgn0000617	e(y)1	238.299	0.546415	0.214201	2.55095	0.010743	0.0252037	-0.129052	0.22318	-0.578244	0.563099	0.803076
FBgn0000618	e(y)2	124.051	-0.317807	0.23881	-1.33079	0.183257	0.28103	-0.531605	0.250373	-2.12325	0.0337328	0.140683
FBgn0000625	eyg	0.989004	-0.531065	2.49422	-0.212919	0.83139	NA	0.0728035	2.49422	0.0291889	0.976714	NA
FBgn0000629	E(z)	575.124	0.00794608	0.141191	0.056279	0.95512	0.970433	0.103084	0.143774	0.716986	0.473383	0.743741
FBgn0000633	CG17716	19.703	-0.351629	0.681827	-0.515716	0.606053	0.704632	-0.0838717	0.693367	-0.120963	0.90372	NA
FBgn0000635	Fas2	965.241	0.800712	0.165802	4.82933	1.3699e-06	6.3109e-06	0.281813	0.168217	1.67529	0.0938766	0.292119
FBgn0000636	Fas3	845.236	1.36696	0.172882	7.90686	2.63959e-15	2.76266e-14	0.429303	0.176301	2.43505	0.0148896	0.0759646
FBgn0000639	Fbp1	0.196233	-2.22791	4.99472	-0.446054	0.655558	NA	-1.49472	4.99472	-0.299259	0.764742	NA
FBgn0000640	Fbp2	0.662224	0.91356	3.47876	0.262611	0.792851	NA	-1.67205	3.69631	-0.452357	0.651012	NA
FBgn0000644	Fcp3C	15.8238	1.50041	0.723888	2.07271	0.0381992	0.0768495	0.391027	0.772158	0.506408	0.61257	NA
FBgn0000658	fj	0.11735	0.645466	4.99681	0.129176	0.897219	NA	0	4.99745	0	1	NA
FBgn0000659	fkh	890.316	1.79244	0.237127	7.55899	4.06221e-14	3.91274e-13	0.901216	0.239308	3.76593	0.000165929	0.00202963
FBgn0000662	fl(2)d	972.994	-0.134918	0.146276	-0.922353	0.356345	0.471902	-0.132007	0.147992	-0.891992	0.372397	0.656186
FBgn0000667	Actn	451.593	-0.444653	0.149664	-2.97101	0.00296818	0.00796086	0.0886067	0.150862	0.587337	0.556978	0.799757
FBgn0000709	fliI	1246.31	0.476294	0.167476	2.84395	0.00445581	0.0114997	0.318836	0.168785	1.88901	0.0588906	0.210911
FBgn0000711	flw	1189.23	0.453955	0.134951	3.36384	0.000768662	0.00230954	0.429767	0.136136	3.15689	0.00159461	0.0129627
FBgn0000715	FMRFa	0	NA	NA	NA	NA	NA	NA	NA	NA	NA	NA
FBgn0000719	fog	506.228	-0.87824	0.168241	-5.22014	1.78788e-07	9.29108e-07	0.34776	0.166094	2.09375	0.0362823	0.147859
FBgn0000721	for	2311.76	-0.384583	0.118839	-3.23616	0.0012115	0.00351022	-0.177712	0.11954	-1.48663	0.137114	0.370809
FBgn0000723	FER	1202.77	-1.36871	0.171733	-7.96999	1.58682e-15	1.68974e-14	-0.65871	0.171794	-3.83431	0.000125918	0.00160358
FBgn0000808	gd	0.890247	-2.2466	3.40102	-0.660565	0.508892	NA	-1.4695	3.38964	-0.433526	0.664633	NA
FBgn0000810	fs(1)K10	223.364	0.145502	0.217004	0.670501	0.502539	0.613086	-0.0314744	0.223041	-0.141115	0.887779	0.965676
FBgn0000826	png	12.6803	0.749103	0.78451	0.954868	0.339644	0.454797	-0.290509	0.844319	-0.344075	0.73079	NA
FBgn0000927	fs(1)Ya	20.2198	0.019357	0.684201	0.0282914	0.97743	0.985681	0.203441	0.69668	0.292014	0.770276	NA
FBgn0000928	fs(1)Yb	1.18608	-3.24497	2.70304	-1.20049	0.229949	NA	0.931159	2.39696	0.388474	0.697665	NA
FBgn0000964	tj	1.94697	-3.39918	2.56482	-1.32531	0.185068	0.28323	-1.11875	2.28374	-0.489876	0.624222	NA
FBgn0000996	dup	193.576	0.852724	0.209905	4.06242	4.85671e-05	0.000179246	0.14224	0.220088	0.64629	0.518092	0.772401
FBgn0001075	ft	8.72432	0.0889567	1.00954	0.088116	0.929784	0.954489	0.497316	1.02134	0.486922	0.626313	NA
FBgn0001077	ftz	0	NA	NA	NA	NA	NA	NA	NA	NA	NA	NA
FBgn0001078	ftz-f1	1249.63	0.633139	0.148258	4.27051	1.95025e-05	7.64866e-05	0.175627	0.150191	1.16936	0.242259	0.525801
FBgn0001079	fu	168.519	-0.0437827	0.234305	-0.186862	0.851769	0.896913	-0.529397	0.245297	-2.15819	0.0309134	0.131782
FBgn0001083	fw	1.05071	-0.775996	3.47258	-0.223464	0.823174	NA	1.88597	3.24386	0.581396	0.560974	NA
FBgn0001084	fy	55.8827	-0.273108	0.380734	-0.717321	0.473176	0.585861	-0.350268	0.39458	-0.887699	0.374703	0.657251
FBgn0001085	fz	89.5969	0.394624	0.290839	1.35685	0.17483	0.270549	-0.124003	0.306124	-0.405074	0.685423	0.87432
FBgn0001086	fzy	35.2347	1.55592	0.499584	3.11443	0.00184301	0.00516014	0.210966	0.536743	0.393048	0.694284	0.878439
FBgn0001087	g	424.891	-0.307916	0.164411	-1.87284	0.0610905	0.114709	-0.0579836	0.166769	-0.347689	0.728074	0.897248
FBgn0001089	Gal	3801.68	-3.52933	0.265551	-13.2906	2.62608e-40	9.6441e-39	-0.283434	0.263365	-1.0762	0.281837	0.569426
FBgn0001090	bnb	6.61728	-1.04757	1.11034	-0.943473	0.345439	0.460839	-0.164121	1.10363	-0.14871	0.881782	NA
FBgn0001091	Gapdh1	4627.59	-0.221564	0.139953	-1.58314	0.113391	0.189708	-0.111361	0.140286	-0.793814	0.427304	0.705331
FBgn0001092	Gapdh2	11382.1	-0.230169	0.137373	-1.67551	0.093835	0.162803	-0.140982	0.137514	-1.02523	0.305257	0.59325
FBgn0001098	Gdh	3859.51	-1.42702	0.186912	-7.63473	2.26293e-14	2.23561e-13	-0.818515	0.18699	-4.37733	1.20142e-05	0.000220067
FBgn0001099	gdl	63.4089	-0.0659475	0.361088	-0.182636	0.855084	0.899326	-0.365004	0.376431	-0.969646	0.332223	0.622385
FBgn0001104	Galphai	2500.56	1.58425	0.112743	14.0519	7.50453e-45	3.26337e-43	0.365792	0.114905	3.18341	0.00145549	0.0120797
FBgn0001105	Gbeta13F	2710.25	0.499057	0.0967577	5.1578	2.49866e-07	1.27422e-06	0.261979	0.0977543	2.67998	0.00736273	0.0433937
FBgn0001108	DCTN1-p150	1595.94	0.305019	0.115745	2.63527	0.00840713	0.0203341	0.231935	0.11711	1.98049	0.047649	0.18135
FBgn0001112	Gld	4.31263	-0.157149	1.25463	-0.125255	0.900322	0.934957	0.123271	1.28176	0.0961729	0.923383	NA
FBgn0001114	Glt	63.445	-1.43032	0.363038	-3.93986	8.153e-05	0.000289987	-0.194993	0.353647	-0.551377	0.581375	0.812421
FBgn0001120	gnu	6.50491	-3.14307	1.16691	-2.6935	0.0070706	0.0174382	-1.06456	1.02375	-1.03986	0.298404	NA
FBgn0001122	Galphao	413.866	0.148244	0.153717	0.964393	0.334849	0.450613	0.0855113	0.157252	0.543785	0.58659	0.815906
FBgn0001123	Galphas	976.213	-0.114516	0.121199	-0.944863	0.344729	0.460214	-0.0625091	0.12309	-0.507831	0.611572	0.830975
FBgn0001124	Got1	4490.15	-0.297319	0.107375	-2.76898	0.00562318	0.0141952	-0.117145	0.10777	-1.08699	0.277042	0.564003
FBgn0001125	Got2	3969.86	0.900162	0.123645	7.2802	3.33317e-13	2.96589e-12	-0.413504	0.125154	-3.30397	0.000953258	0.00866371
FBgn0001128	Gpdh	7796.61	-1.28379	0.129099	-9.94421	2.67274e-23	4.42321e-22	-0.617429	0.129126	-4.78162	1.73892e-06	4.15542e-05
FBgn0001133	grau	359.833	0.272701	0.166121	1.64158	0.100677	0.172095	-0.0814283	0.171944	-0.473574	0.635804	0.844624
FBgn0001134	Grd	69.0422	-1.28588	0.34349	-3.74357	0.000181426	0.000609622	-0.880468	0.349588	-2.51858	0.0117828	0.0626462
FBgn0001137	grk	43.3941	0.800691	0.41696	1.92031	0.0548193	0.10477	0.660247	0.430452	1.53384	0.125068	0.350426
FBgn0001138	grn	0.568392	2.23616	3.74743	0.596718	0.550696	NA	1.46932	3.91572	0.375237	0.707484	NA
FBgn0001139	gro	1116.97	0.161102	0.116075	1.38792	0.165162	0.258279	0.0570661	0.11804	0.483449	0.628777	0.840526
FBgn0001142	Gs1	1771.26	-0.684727	0.191096	-3.58316	0.00033946	0.00108487	0.20021	0.19091	1.04872	0.294307	0.582174
FBgn0001145	Gs2	10307.5	-2.00189	0.177964	-11.2488	2.34676e-29	5.23387e-28	-0.859109	0.177849	-4.83054	1.36164e-06	3.34023e-05
FBgn0001147	gsb-n	0	NA	NA	NA	NA	NA	NA	NA	NA	NA	NA
FBgn0001148	gsb	0	NA	NA	NA	NA	NA	NA	NA	NA	NA	NA
FBgn0001149	GstD1	9111.97	2.0866	0.159571	13.0763	4.49911e-39	1.54832e-37	0.954297	0.159946	5.96636	2.42611e-09	1.20093e-07
FBgn0001150	gt	8.9578	0.0424187	0.861549	0.0492355	0.960732	0.97423	-0.17862	0.90252	-0.197913	0.843113	NA
FBgn0001168	h	2738.35	1.35791	0.202376	6.70984	1.94833e-11	1.52822e-10	0.664827	0.20312	3.27308	0.00106383	0.00949232
FBgn0001169	H	221.664	-0.560173	0.188437	-2.97272	0.0029517	0.00792073	-0.218416	0.190739	-1.14511	0.252165	0.536318
FBgn0001170	H2.0	26.4624	-0.875879	0.527395	-1.66076	0.0967607	0.166468	-0.0433173	0.524665	-0.0825618	0.9342	0.98149
FBgn0001174	halo	0	NA	NA	NA	NA	NA	NA	NA	NA	NA	NA
FBgn0001179	hay	463.025	1.51984	0.151041	10.0624	8.10182e-24	1.38263e-22	0.353145	0.15939	2.2156	0.0267188	0.11863
FBgn0001180	hb	17.6721	-0.962916	0.728477	-1.32182	0.186228	0.284543	-0.534563	0.737233	-0.725094	0.468394	NA
FBgn0001185	her	246.282	-0.141748	0.185846	-0.762718	0.445632	0.56003	-0.0113326	0.189831	-0.0596985	0.952396	0.987927
FBgn0001186	Hex-A	3578.08	0.308923	0.186835	1.65345	0.0982383	0.168453	-0.112194	0.187375	-0.598767	0.549329	0.795493
FBgn0001187	Hex-C	1117.07	-0.59064	0.181042	-3.26245	0.00110453	0.00322637	-0.419305	0.182101	-2.3026	0.0213012	0.0997894
FBgn0001189	hfw	1353.62	-0.762404	0.14176	-5.37812	7.52691e-08	4.08497e-07	0.0723007	0.141587	0.510645	0.6096	0.83001
FBgn0001197	His2Av	1371.13	0.406892	0.113667	3.57969	0.000344007	0.00109873	-0.272324	0.116694	-2.33366	0.0196134	0.094117
FBgn0001202	hook	699.854	0.12194	0.128781	0.946879	0.3437	0.459077	0.181905	0.13117	1.38679	0.165507	0.419609
FBgn0001206	Hmr	58.8489	-0.0863604	0.390387	-0.221217	0.824923	0.877706	-0.0571956	0.400741	-0.142725	0.886508	0.965046
FBgn0001208	Hn	30.8277	-0.275218	0.580318	-0.474254	0.635319	0.72976	0.53482	0.580506	0.9213	0.356894	0.644501
FBgn0001215	Hrb98DE	3863.67	-0.203903	0.101149	-2.01588	0.0438127	0.0863706	-0.253178	0.101841	-2.486	0.0129187	0.0673135
FBgn0001216	Hsc70-1	4.21433	-1.48513	1.21044	-1.22694	0.219845	0.324553	-0.833765	1.23148	-0.677043	0.498378	NA
FBgn0001217	Hsc70-2	20.6502	0.0511983	0.579835	0.0882981	0.92964	0.954464	0.428955	0.589033	0.728235	0.466469	NA
FBgn0001218	Hsc70-3	20303.9	-1.09216	0.12928	-8.44805	2.96221e-17	3.45913e-16	-1.15754	0.129419	-8.94412	3.7494e-19	1.15481e-16
FBgn0001220	Hsc70-5	6454.31	0.0994345	0.108446	0.916903	0.359193	0.474828	-0.433527	0.109088	-3.97412	7.06399e-05	0.000975816
FBgn0001222	Hsf	946.543	0.561705	0.155981	3.60111	0.000316858	0.00101733	0.065049	0.15862	0.410094	0.681737	0.872338
FBgn0001223	Hsp22	159.877	5.50737	0.439283	12.5372	4.67314e-36	1.41186e-34	2.09561	0.470882	4.45038	8.57174e-06	0.000165006
FBgn0001224	Hsp23	112.432	4.23721	0.550228	7.70083	1.35183e-14	1.36007e-13	1.50413	0.573761	2.62152	0.00875392	0.0496573
FBgn0001225	Hsp26	271.715	3.20022	0.638521	5.01192	5.38884e-07	2.63559e-06	0.6847	0.646156	1.05965	0.289303	0.577803
FBgn0001226	Hsp27	169.671	2.13688	0.35118	6.08485	1.16601e-09	7.71866e-09	0.737392	0.362204	2.03585	0.0417657	0.164064
FBgn0001227	Hsp67Ba	5.39528	1.48194	1.14483	1.29446	0.195506	0.296237	-0.623352	1.32409	-0.470776	0.6378	NA
FBgn0001228	CG4456	1.64925	0.330345	3.61311	0.0914296	0.927151	0.953104	4.37449	3.37899	1.29462	0.195452	NA
FBgn0001229	Hsp67Bc	1.11021	2.22221	3.19664	0.695172	0.486948	NA	3.34746	3.17136	1.05553	0.291185	NA
FBgn0001230	Hsp68	240.826	5.69001	0.962944	5.90897	3.44252e-09	2.17232e-08	2.67919	0.970364	2.76101	0.00576222	0.0360833
FBgn0001233	Hsp83	27745.3	-0.337574	0.147315	-2.29151	0.0219337	0.047402	-1.05308	0.147463	-7.14135	9.24192e-13	9.04186e-11
FBgn0001235	hth	634.375	-0.77229	0.160513	-4.8114	1.49879e-06	6.87116e-06	-0.43988	0.161709	-2.7202	0.0065242	0.0394871
FBgn0001247	Ide	1135.01	-0.16785	0.130749	-1.28376	0.199227	0.300561	0.0101964	0.132017	0.0772355	0.938436	0.983363
FBgn0001248	Idh	18619.3	-1.38881	0.208585	-6.65828	2.77059e-11	2.13294e-10	-0.898624	0.208616	-4.30754	1.65078e-05	0.000284221
FBgn0001250	if	97.2719	-0.958776	0.296934	-3.22892	0.00124259	0.00359526	-0.0744725	0.294811	-0.252611	0.800569	0.929843
FBgn0001253	ImpE1	0.11735	0.645466	4.99681	0.129176	0.897219	NA	0	4.99745	0	1	NA
FBgn0001254	ImpE2	2.22207	4.88996	2.57836	1.89654	0.0578888	0.109628	0	2.93594	0	1	NA
FBgn0001255	ImpE3	18.3369	-0.268275	0.726033	-0.369508	0.711749	0.792671	0.623148	0.722588	0.862383	0.388477	NA
FBgn0001256	ImpL1	0.302135	0.645271	4.99682	0.129136	0.89725	NA	1.35397	4.99377	0.271133	0.786289	NA
FBgn0001257	ImpL2	778.729	2.24564	0.513449	4.37364	1.2219e-05	4.92601e-05	2.14664	0.51392	4.17699	2.95398e-05	0.000470234
FBgn0001258	ImpL3	1610	0.580889	0.185167	3.13711	0.00170623	0.00481347	-0.099575	0.186751	-0.533196	0.593898	0.820831
FBgn0001259	in	30.7968	0.0956491	0.536345	0.178335	0.85846	0.901574	0.479592	0.542686	0.883737	0.376838	0.658389
FBgn0001263	inaD	53.8402	4.1878	0.609165	6.87466	6.21388e-12	5.08111e-11	0.2565	0.703451	0.364631	0.715387	0.891375
FBgn0001269	inv	0.651774	2.63834	3.55987	0.741133	0.458613	NA	1.3583	3.76767	0.360514	0.718463	NA
FBgn0001276	ix	124.224	-0.155201	0.255234	-0.608073	0.543139	0.64928	0.276258	0.258232	1.06981	0.284707	0.572719
FBgn0001280	janA	440.209	-0.0710247	0.188503	-0.376782	0.706335	0.788925	-0.435511	0.193222	-2.25394	0.0241998	0.110272
FBgn0001281	janB	0.351675	2.23012	4.85649	0.459203	0.646088	NA	0	4.99745	0	1	NA
FBgn0001285	Jon44E	925.391	-5.17139	0.241137	-21.4459	4.98571e-102	6.55905e-100	-1.01578	0.214123	-4.74393	2.09612e-06	4.92411e-05
FBgn0001291	Jra	2226.19	1.53979	0.11534	13.35	1.18465e-40	4.42881e-39	0.495562	0.117419	4.22048	2.43787e-05	0.000402249
FBgn0001296	kar	774.808	-0.747444	0.180618	-4.13827	3.49939e-05	0.000131581	-0.0214172	0.180664	-0.118547	0.905634	0.971387
FBgn0001297	kay	6310.14	2.0103	0.117036	17.1767	3.96744e-66	2.86345e-64	0.985033	0.117718	8.36776	5.87248e-17	1.08524e-14
FBgn0001301	kel	274.447	-0.230419	0.176789	-1.30336	0.192453	0.292515	0.258892	0.178455	1.45074	0.146852	0.387935
FBgn0001308	Khc	4485.28	0.412357	0.103352	3.98985	6.61147e-05	0.000238091	0.286605	0.103928	2.75773	0.00582035	0.0363378
FBgn0001311	kkv	3.46897	-0.0552007	1.52807	-0.0361245	0.971183	0.981381	-1.25618	1.68326	-0.746279	0.455499	NA
FBgn0001313	kl-2	0	NA	NA	NA	NA	NA	NA	NA	NA	NA	NA
FBgn0001316	klar	4575.85	-0.101666	0.117784	-0.863153	0.388053	0.502998	0.0323098	0.118162	0.273437	0.784517	0.922816
FBgn0001319	kn	2.15566	-0.932608	2.06455	-0.451724	0.651468	0.743054	1.11314	1.96917	0.565282	0.571882	NA
FBgn0001320	kni	18.6091	-0.820409	0.597588	-1.37287	0.169794	0.264211	-0.301768	0.603414	-0.5001	0.617004	NA
FBgn0001321	knk	8.94519	-1.18014	0.840683	-1.40378	0.160383	0.252249	-0.255987	0.831045	-0.30803	0.75806	NA
FBgn0001323	knrl	12.2568	-0.673133	0.73254	-0.918902	0.358147	0.473745	-0.0191723	0.735045	-0.0260832	0.979191	NA
FBgn0001324	kto	756.165	-0.364267	0.17213	-2.11623	0.0343254	0.0700871	0.221098	0.172751	1.27987	0.200592	0.469895
FBgn0001325	Kr	1.28754	-1.38355	2.65077	-0.521941	0.601711	0.700917	-0.135037	2.57824	-0.0523754	0.95823	NA
FBgn0001330	kz	295.989	0.170683	0.208258	0.819576	0.412458	0.527562	-0.0552448	0.213318	-0.258979	0.795652	0.927609
FBgn0001341	l(1)1Bi	417.546	0.641607	0.198219	3.23685	0.00120856	0.00350364	0.0505858	0.203275	0.248855	0.803473	0.930986
FBgn0001404	egh	3363.35	0.829291	0.106106	7.81571	5.46544e-15	5.61288e-14	0.294542	0.107164	2.74851	0.0059866	0.0369322
FBgn0001491	l(1)10Bb	526.764	-0.0761683	0.151518	-0.502701	0.615175	0.712369	-0.0959514	0.154628	-0.620532	0.534907	0.784393
FBgn0001565	Hlc	1310.03	-0.725567	0.165297	-4.38948	1.13624e-05	4.61468e-05	0.111529	0.165139	0.675363	0.499445	0.760686
FBgn0001612	Grip91	123.35	0.0839803	0.250931	0.334675	0.73787	0.813567	-0.0965825	0.260644	-0.370553	0.710971	0.888687
FBgn0001624	dlg1	716.296	0.0874397	0.130667	0.669177	0.503382	0.613612	-0.00695798	0.133537	-0.0521051	0.958445	0.989301
FBgn0001941	ifc	6017.9	0.262678	0.141921	1.85087	0.0641883	0.119511	0.342053	0.142156	2.40619	0.0161201	0.0806102
FBgn0001942	eIF4A	31377.2	-0.834467	0.0871844	-9.57129	1.05579e-21	1.58979e-20	-0.257798	0.087208	-2.95612	0.00311534	0.0220674
FBgn0001961	Arpc1	4189.3	0.762572	0.0957671	7.96278	1.68213e-15	1.78391e-14	0.240626	0.0967406	2.48733	0.0128707	0.0671051
FBgn0001965	Sos	852.982	0.18553	0.147636	1.25667	0.208873	0.311318	-0.0621314	0.150186	-0.413698	0.679095	0.87097
FBgn0001967	NimC3	0.857821	-0.819337	2.86553	-0.285929	0.774933	NA	-1.05898	3.02926	-0.349583	0.726651	NA
FBgn0001970	Pgant35A	112.76	-0.400017	0.287201	-1.39281	0.163677	0.256421	-0.0928623	0.291788	-0.318253	0.750293	0.907291
FBgn0001974	l(2)35Bd	149.977	1.41629	0.247197	5.72941	1.00781e-08	6.01275e-08	0.270931	0.262766	1.03107	0.302506	0.590803
FBgn0001977	CIAPIN1	1531.08	1.35106	0.141151	9.5717	1.05161e-21	1.58627e-20	0.309166	0.143693	2.15157	0.0314315	0.133345
FBgn0001978	stc	2222.75	1.29002	0.103377	12.4787	9.75179e-36	2.92076e-34	-0.0436072	0.106396	-0.409857	0.681911	0.872426
FBgn0001981	esg	575.345	-1.25457	0.18396	-6.81978	9.11803e-12	7.34602e-11	0.205836	0.181087	1.13667	0.255677	0.541295
FBgn0001983	wor	0.11735	0.645466	4.99681	0.129176	0.897219	NA	0	4.99745	0	1	NA
FBgn0001986	Mtr4	511.827	0.212628	0.17455	1.21815	0.223166	0.328522	0.0621315	0.177712	0.34962	0.726624	0.896795
FBgn0001987	Gli	5038.99	1.23536	0.139187	8.87559	6.95609e-19	8.95844e-18	0.728758	0.139689	5.21702	1.81827e-07	5.6845e-06
FBgn0001989	ND-B17	1395.59	-0.873534	0.178731	-4.88742	1.02166e-06	4.77218e-06	-0.0177366	0.178605	-0.0993063	0.920895	0.976261
FBgn0001990	wek	143.686	-0.0861154	0.224465	-0.383648	0.701239	0.784835	0.102002	0.230228	0.443049	0.65773	0.859153
FBgn0001991	Ca-alpha1D	81.0829	-0.669831	0.310973	-2.15398	0.0312415	0.0646541	0.470449	0.304679	1.54408	0.122569	0.347087
FBgn0001992	Cyp303a1	10.2116	0.205931	0.870268	0.236629	0.812945	0.870037	-0.73762	0.925177	-0.797274	0.425292	NA
FBgn0001994	crp	792.792	0.197787	0.163204	1.2119	0.22555	0.331281	0.404392	0.164358	2.46044	0.0138768	0.0715432
FBgn0001995	mRpL4	783.75	-0.112273	0.221863	-0.506047	0.612824	0.7102	-0.257675	0.223632	-1.15222	0.249229	0.532662
FBgn0002021	l(2)37Bb	535.887	0.403857	0.145243	2.78055	0.00542664	0.0137492	-0.0434218	0.150138	-0.289212	0.772419	0.917765
FBgn0002022	Catsup	1792.91	-1.00029	0.124675	-8.02324	1.02996e-15	1.11388e-14	-0.225836	0.124623	-1.81216	0.0699617	0.237956
FBgn0002023	Lim3	61.731	-1.05759	0.364279	-2.90324	0.00369325	0.00972238	-0.827073	0.372279	-2.22165	0.0263072	0.117304
FBgn0002031	l(2)37Cc	3531.74	0.147619	0.0950495	1.55307	0.120407	0.19936	-0.192073	0.0961368	-1.99792	0.0457256	0.175687
FBgn0002036	CG10561	144.922	-0.624935	0.227439	-2.74771	0.00600135	0.0150584	-0.270275	0.23175	-1.16624	0.243518	0.526348
FBgn0002044	swm	1424.04	0.314106	0.120304	2.61094	0.00902937	0.0216226	-0.0587621	0.122402	-0.480077	0.631173	0.841926
FBgn0002069	AspRS	6512.25	0.221905	0.102099	2.17343	0.0297478	0.0619339	-0.0222863	0.10258	-0.217258	0.828007	0.942235
FBgn0002121	l(2)gl	7013.75	0.61524	0.0988873	6.22163	4.92022e-10	3.382e-09	0.602982	0.0991919	6.07895	1.20973e-09	6.36714e-08
FBgn0002174	l(2)tid	1300.77	-0.00710486	0.123664	-0.0574528	0.954184	0.969672	-0.262066	0.125762	-2.08382	0.0371766	0.150663
FBgn0002183	dre4	1406.69	1.37034	0.125568	10.9131	9.97564e-28	2.04491e-26	0.261769	0.128856	2.03149	0.0422058	0.16548
FBgn0002283	l(3)73Ah	319.856	0.10907	0.187775	0.580857	0.561337	0.664537	-0.211587	0.193673	-1.0925	0.274613	0.561769
FBgn0002284	Prosbeta6	1701.68	0.213063	0.103852	2.05159	0.0402094	0.080442	0.305482	0.104968	2.91023	0.00361157	0.0249451
FBgn0002306	sas	23.5161	0.00549398	0.609806	0.00900939	0.992812	0.995686	0.470299	0.614831	0.764923	0.444317	0.721392
FBgn0002354	l(3)87Df	176.878	-0.431095	0.211858	-2.03483	0.0418682	0.0831523	-0.0371141	0.214949	-0.172665	0.862915	0.954658
FBgn0002413	dco	1308.31	0.575782	0.114735	5.01835	5.21182e-07	2.55623e-06	0.216359	0.116938	1.8502	0.0642848	0.224736
FBgn0002431	hyd	2716.26	-0.115315	0.155119	-0.743396	0.457242	0.571031	0.28438	0.155382	1.83019	0.067221	0.231575
FBgn0002440	l(3)mbn	0	NA	NA	NA	NA	NA	NA	NA	NA	NA	NA
FBgn0002441	l(3)mbt	518.185	0.735992	0.157981	4.65873	3.18165e-06	1.39568e-05	0.485831	0.161506	3.00812	0.00262869	0.0192771
FBgn0002466	sti	46.7071	1.98107	0.445664	4.44522	8.7802e-06	3.62257e-05	0.782102	0.472689	1.65458	0.0980097	0.300956
FBgn0002521	pho	788.276	0.360267	0.132052	2.72822	0.00636775	0.0158667	0.10328	0.134865	0.765798	0.443796	0.721018
FBgn0002522	lab	359.837	-0.52557	0.206368	-2.54676	0.0108728	0.0254526	0.193283	0.206374	0.936567	0.348981	0.637405
FBgn0002524	lace	3682.41	1.38957	0.133152	10.436	1.6977e-25	3.17341e-24	0.116683	0.134495	0.867562	0.385634	0.667487
FBgn0002525	Lam	787.17	0.967024	0.122032	7.92432	2.29401e-15	2.41802e-14	-0.175496	0.128452	-1.36624	0.171865	0.430619
FBgn0002526	LanA	822.185	-0.560286	0.219947	-2.54736	0.0108541	0.0254241	0.120265	0.220081	0.546456	0.584752	0.814666
FBgn0002531	Lcp1	0	NA	NA	NA	NA	NA	NA	NA	NA	NA	NA
FBgn0002533	Lcp2	0	NA	NA	NA	NA	NA	NA	NA	NA	NA	NA
FBgn0002534	Lcp3	0	NA	NA	NA	NA	NA	NA	NA	NA	NA	NA
FBgn0002535	Lcp4	0	NA	NA	NA	NA	NA	NA	NA	NA	NA	NA
FBgn0002542	lds	186.262	1.4619	0.22683	6.44492	1.1566e-10	8.41774e-10	0.699073	0.236871	2.95128	0.00316457	0.0223211
FBgn0002543	robo2	335.879	-1.18099	0.183241	-6.44499	1.15609e-10	8.41774e-10	-0.0890191	0.180918	-0.492042	0.62269	0.837504
FBgn0002552	lin	340.636	-0.161606	0.208235	-0.776073	0.437706	0.552006	-0.170488	0.211832	-0.804823	0.420922	0.700918
FBgn0002561	l(1)sc	0	NA	NA	NA	NA	NA	NA	NA	NA	NA	NA
FBgn0002562	Lsp1alpha	0.116502	0.640197	4.99719	0.128111	0.898061	NA	0	4.99745	0	1	NA
FBgn0002563	Lsp1beta	2.27588	0.701059	2.08337	0.336503	0.736492	0.813082	-1.99773	2.48231	-0.804787	0.420943	NA
FBgn0002564	Lsp1gamma	14.2179	-0.498893	0.73501	-0.678757	0.497292	0.608256	0.478533	0.727507	0.657771	0.510685	NA
FBgn0002565	Lsp2	8.82262	-1.01844	1.71845	-0.592651	0.553415	0.657555	-2.45128	1.81376	-1.35149	0.176539	NA
FBgn0002566	lt	1005.95	-0.157691	0.119866	-1.31556	0.188321	0.287361	0.176863	0.120856	1.46342	0.143353	0.382386
FBgn0002567	Rab32	3373.57	0.110512	0.115262	0.958785	0.337667	0.453052	-0.199685	0.116143	-1.71931	0.0855586	0.27349
FBgn0002569	Mal-A2	4634.62	0.207704	0.136636	1.52013	0.128478	0.210645	-0.0424744	0.137149	-0.309695	0.756793	0.909908
FBgn0002570	Mal-A1	36764.9	0.307441	0.174644	1.76039	0.0783415	0.140525	-0.67463	0.174744	-3.86067	0.000113078	0.00146701
FBgn0002571	Mal-A3	401.737	1.93545	0.249064	7.77086	7.79528e-15	7.95838e-14	-1.30479	0.272459	-4.78894	1.67665e-06	4.04146e-05
FBgn0002573	sens	1.56986	-5.19147	4.10718	-1.264	0.206231	0.308166	-4.45827	4.10718	-1.08548	0.277709	NA
FBgn0002576	lz	8.54263	2.83298	1.23447	2.29489	0.0217397	0.0470219	2.52801	1.25775	2.00995	0.044436	NA
FBgn0002577	m	0.702374	-0.779861	3.25814	-0.239358	0.810828	NA	0.942441	3.09588	0.304418	0.760809	NA
FBgn0002578	Kaz-m1	4552.21	-1.69634	0.17973	-9.43826	3.79027e-21	5.49405e-20	-0.12771	0.179299	-0.712272	0.476296	0.745507
FBgn0002579	RpL36	21707.9	-1.38564	0.0922041	-15.028	4.81416e-51	2.37126e-49	-0.521955	0.092177	-5.66253	1.49159e-08	6.02141e-07
FBgn0002590	RpS5a	31264.2	-1.00835	0.0951676	-10.5955	3.12682e-26	6.01797e-25	-0.355891	0.0951787	-3.73919	0.000184618	0.00223854
FBgn0002592	E(spl)m2-BFM	1.05339	1.21485	2.47051	0.49174	0.622903	NA	0.945828	2.57367	0.367502	0.713245	NA
FBgn0002593	RpLP1	31954.5	-1.10002	0.146266	-7.52068	5.4492e-14	5.19098e-13	-0.345505	0.146265	-2.36219	0.0181672	0.0886089
FBgn0002609	E(spl)m3-HLH	308.822	-0.550886	0.185734	-2.96599	0.0030171	0.00808372	-0.0176033	0.18687	-0.0942012	0.924949	0.976804
FBgn0002622	RpS3	31315.4	-1.10614	0.106023	-10.433	1.75196e-25	3.26896e-24	-0.376453	0.106024	-3.55063	0.000384307	0.00411439
FBgn0002626	RpL32	25745.9	-1.40653	0.124926	-11.2589	2.09311e-29	4.68828e-28	-0.569985	0.124912	-4.56309	5.04051e-06	0.000106931
FBgn0002629	E(spl)m4-BFM	0	NA	NA	NA	NA	NA	NA	NA	NA	NA	NA
FBgn0002631	E(spl)m5-HLH	1.07178	1.20661	2.81137	0.42919	0.667785	NA	0.995259	2.89594	0.343674	0.731092	NA
FBgn0002632	E(spl)m6-BFM	19.4469	-1.97216	0.66009	-2.98772	0.00281069	0.00757953	-1.36416	0.665474	-2.04991	0.040373	NA
FBgn0002633	E(spl)m7-HLH	2.34965	1.82444	2.08429	0.875329	0.381395	0.496597	0.494266	2.21155	0.223493	0.823152	NA
FBgn0002638	Rcc1	802.887	1.0203	0.134678	7.57583	3.56842e-14	3.44351e-13	-0.0971829	0.140385	-0.692258	0.488775	0.755372
FBgn0002641	mal	1452.12	1.92123	0.139989	13.7241	7.28408e-43	2.92291e-41	0.751572	0.142767	5.26434	1.40693e-07	4.50002e-06
FBgn0002643	mam	169.074	0.232079	0.260355	0.891394	0.372718	0.488155	-0.269624	0.269168	-1.00169	0.316492	0.606299
FBgn0002645	Map205	1514.7	0.392678	0.13772	2.85127	0.00435447	0.0112689	0.462286	0.13866	3.33396	0.000856199	0.00792008
FBgn0002673	twe	13.9025	0.903582	0.712671	1.26788	0.204841	0.306583	0.273208	0.753862	0.362412	0.717044	NA
FBgn0002707	mei-9	235.864	1.1784	0.201914	5.83613	5.34271e-09	3.29536e-08	-0.0593299	0.215469	-0.275353	0.783045	0.921829
FBgn0002709	mei-218	81.5823	-0.406875	0.541179	-0.75183	0.452153	0.566189	0.251239	0.541512	0.463958	0.642678	0.849262
FBgn0002715	mei-S332	54.6324	0.936206	0.36761	2.54673	0.0108736	0.0254526	-0.492892	0.40553	-1.21543	0.224203	0.502169
FBgn0002716	mei-W68	28.5634	1.79292	0.581448	3.08354	0.00204555	0.00566767	0.934981	0.607606	1.53879	0.123855	0.348719
FBgn0002719	Men	3173.98	-0.0108557	0.125753	-0.0863253	0.931208	0.955196	-0.26845	0.126569	-2.12098	0.0339233	0.141208
FBgn0002723	Met	365.75	0.12938	0.195512	0.661749	0.508132	0.617446	0.0107192	0.199188	0.0538144	0.957083	0.989301
FBgn0002732	E(spl)malpha-BFM	130.292	-1.34885	0.271478	-4.96853	6.74637e-07	3.24607e-06	-0.0762793	0.265117	-0.28772	0.773561	0.917962
FBgn0002733	E(spl)mbeta-HLH	244.509	-1.03971	0.188247	-5.52313	3.33006e-08	1.86774e-07	-0.0654958	0.186243	-0.351668	0.725088	0.895242
FBgn0002734	E(spl)mdelta-HLH	0	NA	NA	NA	NA	NA	NA	NA	NA	NA	NA
FBgn0002735	E(spl)mgamma-HLH	10.2867	-1.22045	0.782132	-1.56041	0.118662	0.196912	-1.42471	0.838002	-1.70013	0.0891066	NA
FBgn0002736	mago	532.44	0.206458	0.200314	1.03067	0.302695	0.416511	-0.400446	0.20457	-1.9575	0.0502885	0.188803
FBgn0002772	Mlc1	850.722	-1.30525	0.144079	-9.05922	1.3139e-19	1.76883e-18	-0.0457725	0.142262	-0.321747	0.747644	0.906724
FBgn0002773	Mlc2	2204.68	-1.3983	0.135244	-10.3391	4.68752e-25	8.59213e-24	0.0245469	0.134234	0.182867	0.854902	0.951728
FBgn0002774	mle	707.673	0.169701	0.134273	1.26385	0.206284	0.308166	0.0379234	0.13722	0.276371	0.782263	0.921562
FBgn0002775	msl-3	188.612	0.399511	0.214241	1.86477	0.062214	0.116419	-0.0342761	0.223461	-0.153387	0.878093	0.961613
FBgn0002778	mnd	112.265	1.20042	0.289383	4.1482	3.35106e-05	0.00012637	0.345943	0.303934	1.13822	0.255029	0.540252
FBgn0002780	mod	5173.97	-0.47662	0.159595	-2.98644	0.00282244	0.00760678	-0.674571	0.160031	-4.21526	2.49485e-05	0.000410835
FBgn0002781	mod(mdg4)	1203.53	0.27165	0.118486	2.29267	0.021867	0.0472875	-0.0299411	0.120814	-0.247829	0.804267	0.931386
FBgn0002783	mor	955.743	0.275497	0.140201	1.96501	0.0494128	0.0956256	-0.0359544	0.142767	-0.251839	0.801165	0.929866
FBgn0002787	Rpn8	1878.92	0.0942899	0.108914	0.865731	0.386638	0.501418	0.229257	0.109852	2.08696	0.0368916	0.1498
FBgn0002789	Mp20	1555.46	-0.960396	0.155265	-6.18552	6.18975e-10	4.21642e-09	-0.149711	0.155141	-0.965003	0.334543	0.623669
FBgn0002791	mr	271.453	0.446124	0.187753	2.37613	0.0174954	0.038827	0.361439	0.19262	1.87644	0.0605954	0.215531
FBgn0002838	ms(3)K81	0.234701	1.64647	4.89189	0.336571	0.73644	NA	0	4.99745	0	1	NA
FBgn0002842	sa	0.670668	2.63028	3.54235	0.742523	0.45777	NA	1.42771	3.74433	0.381301	0.70298	NA
FBgn0002855	Acp26Aa	0.389185	0	4.99745	0	1	NA	2.37626	4.89224	0.485721	0.627165	NA
FBgn0002856	Acp26Ab	0	NA	NA	NA	NA	NA	NA	NA	NA	NA	NA
FBgn0002862	Mst87F	0.184775	0	4.99745	0	1	NA	1.35386	4.99376	0.27111	0.786306	NA
FBgn0002863	Acp95EF	0	NA	NA	NA	NA	NA	NA	NA	NA	NA	NA
FBgn0002865	Mst98Ca	0	NA	NA	NA	NA	NA	NA	NA	NA	NA	NA
FBgn0002868	MtnA	21481.2	-1.62634	0.201026	-8.09019	5.95711e-16	6.57243e-15	-1.34216	0.201091	-6.67441	2.48235e-11	1.96173e-09
FBgn0002869	MtnB	950.309	-1.66243	0.279749	-5.94259	2.80546e-09	1.78769e-08	-1.36839	0.28065	-4.87578	1.08379e-06	2.75622e-05
FBgn0002872	mu2	74.9215	0.805338	0.328351	2.45268	0.0141798	0.0323181	0.513934	0.340452	1.50956	0.131155	0.360556
FBgn0002873	mud	44.5088	0.429184	0.405626	1.05808	0.29002	0.403019	-0.0774037	0.425355	-0.181975	0.855603	0.951728
FBgn0002878	mus101	56.4878	1.43319	0.367969	3.89488	9.82475e-05	0.000345428	0.411931	0.393006	1.04815	0.294568	0.58251
FBgn0002887	mus201	220.985	1.61976	0.223629	7.24307	4.38651e-13	3.87332e-12	0.0748788	0.238961	0.313351	0.754014	0.909169
FBgn0002891	mus205	222.333	2.09948	0.232258	9.03946	1.57444e-19	2.11137e-18	0.496214	0.246766	2.01087	0.0443393	0.1719
FBgn0002899	mus301	74.4977	0.48425	0.317151	1.52688	0.126792	0.208406	0.439449	0.327039	1.34372	0.179039	0.44076
FBgn0002901	mus304	82.3365	1.82045	0.321994	5.65368	1.57047e-08	9.15931e-08	0.666996	0.342788	1.9458	0.0516791	0.19246
FBgn0002905	mus308	133.204	0.663027	0.297183	2.23104	0.0256787	0.0545206	0.689402	0.302394	2.27981	0.0226188	0.104732
FBgn0002906	Blm	70.7996	1.11294	0.351387	3.16727	0.00153875	0.00436828	0.57488	0.36598	1.5708	0.11623	0.336081
FBgn0002914	Myb	935.011	-0.363114	0.138962	-2.61304	0.00897395	0.0215197	-0.00973877	0.140009	-0.0695584	0.944545	0.985303
FBgn0002917	na	4.14845	0.522258	1.24089	0.420874	0.673847	0.761323	-0.0789193	1.32344	-0.0596318	0.952449	NA
FBgn0002921	Atpalpha	6712.27	-0.586367	0.126124	-4.64912	3.33359e-06	1.45817e-05	-0.216068	0.126286	-1.71094	0.087092	0.27654
FBgn0002922	nau	0.469165	2.64598	4.83861	0.546846	0.584484	NA	0	4.99745	0	1	NA
FBgn0002924	ncd	90.7941	0.626633	0.328889	1.9053	0.0567411	0.107651	0.147688	0.340449	0.433802	0.664432	0.862687
FBgn0002926	ndl	1.28806	4.10316	3.21888	1.27472	0.202409	0.304037	0	3.5005	0	1	NA
FBgn0002930	nec	27.8182	-0.820854	0.601965	-1.36362	0.172686	0.267844	0.100345	0.597883	0.167834	0.866714	0.956209
FBgn0002931	net	75.9534	-0.717939	0.393986	-1.82225	0.0684178	0.125912	0.431442	0.389621	1.10734	0.268148	0.554496
FBgn0002932	neur	791.092	0.943589	0.143535	6.57393	4.90043e-11	3.70671e-10	0.655033	0.145982	4.48707	7.22109e-06	0.000143319
FBgn0002933	ng1	0	NA	NA	NA	NA	NA	NA	NA	NA	NA	NA
FBgn0002936	ninaA	2.11825	1.62792	2.09791	0.775971	0.437766	0.552014	-0.0504592	2.28486	-0.0220841	0.982381	NA
FBgn0002937	ninaB	0.943149	-0.854178	3.55745	-0.24011	0.810245	NA	1.54198	3.35355	0.459806	0.645656	NA
FBgn0002938	ninaC	8.49055	2.51676	2.22319	1.13205	0.257614	0.368025	6.75219	2.1089	3.20176	0.0013659	NA
FBgn0002939	ninaD	222.046	-1.54485	0.433737	-3.56172	0.000368426	0.00116882	-0.0818044	0.430481	-0.190031	0.849285	0.949251
FBgn0002940	ninaE	57.5909	-1.80289	2.19743	-0.820452	0.411958	0.527146	7.12845	1.66072	4.29238	1.76765e-05	0.000301225
FBgn0002941	slou	0.116502	0.640197	4.99719	0.128111	0.898061	NA	0	4.99745	0	1	NA
FBgn0002945	nkd	100.247	-1.42725	0.305289	-4.67509	2.9383e-06	1.29342e-05	-1.07261	0.311061	-3.44822	0.000564289	0.00558646
FBgn0002948	nod	14.9221	0.305771	0.688903	0.443852	0.65715	0.74732	-0.364333	0.734251	-0.496197	0.619756	NA
FBgn0002962	nos	4.57277	-2.36112	1.53261	-1.54058	0.123419	0.203505	-0.52306	1.43846	-0.363625	0.716138	NA
FBgn0002973	numb	1603.03	1.34585	0.132909	10.1261	4.23164e-24	7.35443e-23	0.269285	0.135535	1.98683	0.0469412	0.179312
FBgn0002985	odd	663.133	-0.467099	0.239522	-1.95013	0.0511606	0.098558	-0.123154	0.24039	-0.512311	0.608433	0.829328
FBgn0002989	okr	76.6548	0.380539	0.373487	1.01888	0.308259	0.422446	0.433954	0.380632	1.14009	0.25425	0.53896
FBgn0003002	opa	5.35298	-1.14336	1.10701	-1.03283	0.301682	0.415447	-0.744144	1.1294	-0.658885	0.50997	NA
FBgn0003008	or	200.99	0.488292	0.206677	2.36258	0.0181481	0.0400453	0.367231	0.212885	1.72502	0.0845244	0.271651
FBgn0003009	ord	0	NA	NA	NA	NA	NA	NA	NA	NA	NA	NA
FBgn0003011	ort	0.204461	0	4.99745	0	1	NA	1.4276	4.9887	0.286166	0.774751	NA
FBgn0003015	osk	24.0451	-0.75442	0.768058	-0.982243	0.32598	0.440905	-0.586278	0.779548	-0.752074	0.452006	0.726328
FBgn0003016	osp	360.271	0.0789425	0.215541	0.366253	0.714177	0.794693	-0.178389	0.219959	-0.811009	0.41736	0.697782
FBgn0003023	otu	36.3419	0.73616	0.428855	1.71657	0.0860579	0.151902	0.096403	0.456772	0.211053	0.832846	0.943718
FBgn0003028	ovo	9.99511	-1.92314	0.932481	-2.06239	0.0391704	0.0785601	-0.201988	0.884887	-0.228264	0.819441	NA
FBgn0003034	SP	0	NA	NA	NA	NA	NA	NA	NA	NA	NA	NA
FBgn0003041	pbl	183.522	0.608216	0.223364	2.72298	0.00646959	0.0160819	0.531406	0.230637	2.30408	0.0212182	0.0995769
FBgn0003042	Pc	98.1839	0.499082	0.296259	1.68461	0.0920633	0.160459	-0.127764	0.31103	-0.410775	0.681237	0.872101
FBgn0003044	Pcl	268.343	0.213781	0.187073	1.14276	0.253137	0.362726	-0.227675	0.194682	-1.16947	0.242214	0.525801
FBgn0003046	Pcp	1.34227	-0.773196	1.98987	-0.388565	0.697598	0.782107	-0.637416	2.07535	-0.307136	0.75874	NA
FBgn0003048	pcx	541.052	0.140625	0.158826	0.8854	0.375941	0.491466	0.127821	0.161594	0.790998	0.428945	0.707198
FBgn0003053	peb	4388.83	1.44297	0.10629	13.5758	5.57417e-42	2.17791e-40	0.350889	0.107499	3.2641	0.00109811	0.0097563
FBgn0003057	CG10598	0	NA	NA	NA	NA	NA	NA	NA	NA	NA	NA
FBgn0003060	CG9757	0	NA	NA	NA	NA	NA	NA	NA	NA	NA	NA
FBgn0003062	Fib	1624.35	-0.0313956	0.169683	-0.185025	0.853209	0.897874	-0.717129	0.17157	-4.17981	2.91749e-05	0.000466573
FBgn0003065	CG2150	0.438299	1.64183	4.10583	0.399878	0.689246	NA	1.42069	4.22083	0.336591	0.736425	NA
FBgn0003068	per	433.462	2.91418	0.224671	12.9709	1.78937e-38	6.01841e-37	0.115655	0.240945	0.480005	0.631224	0.841926
FBgn0003071	Pfk	879.193	-0.368197	0.127755	-2.88206	0.00395085	0.0103143	-0.0177788	0.128944	-0.13788	0.890336	0.966962
FBgn0003074	Pgi	2194.75	-0.532942	0.188143	-2.83264	0.0046165	0.0118614	-0.0719326	0.188386	-0.381836	0.702583	0.883782
FBgn0003076	Pgm	1042.95	-0.201195	0.131593	-1.52892	0.126284	0.207669	0.156304	0.132542	1.17927	0.238289	0.519699
FBgn0003079	Raf	620.458	0.207476	0.133808	1.55055	0.121009	0.200167	-0.0379759	0.137799	-0.275589	0.782864	0.921829
FBgn0003082	phr	644.157	-0.289539	0.130524	-2.21828	0.0265354	0.0560762	-0.233695	0.133352	-1.75246	0.0796949	0.261128
FBgn0003086	Pig1	0	NA	NA	NA	NA	NA	NA	NA	NA	NA	NA
FBgn0003087	pim	9.65185	1.06933	1.07385	0.99579	0.319352	0.43398	1.10499	1.09221	1.01169	0.311684	NA
FBgn0003089	pip	2.04185	0.00252648	1.76239	0.00143355	0.998856	1	-1.02323	1.95463	-0.523489	0.600634	NA
FBgn0003090	pk	22.6389	-0.774838	0.568336	-1.36335	0.172774	0.267926	-0.370194	0.57959	-0.638717	0.523007	0.775281
FBgn0003091	Pkc53E	85.5368	-1.39057	0.323701	-4.29584	1.74033e-05	6.86945e-05	-0.674968	0.323091	-2.0891	0.036699	0.149164
FBgn0003093	Pkc98E	516.723	-0.357215	0.142453	-2.50761	0.0121552	0.0281426	0.102903	0.143641	0.716391	0.47375	0.74382
FBgn0003114	plu	0.894007	-1.84718	2.98313	-0.619209	0.535779	NA	-0.160132	2.81333	-0.056919	0.95461	NA
FBgn0003116	pn	288.301	-0.415224	0.188255	-2.20564	0.0274091	0.0576691	0.144182	0.189379	0.761343	0.446452	0.722455
FBgn0003117	pnr	6.0772	2.27328	1.20304	1.88962	0.0588092	0.111007	0.487503	1.31603	0.370435	0.711059	NA
FBgn0003118	pnt	1529.44	0.793139	0.159799	4.96334	6.92921e-07	3.32327e-06	0.143263	0.161498	0.887086	0.375033	0.65738
FBgn0003124	polo	100.359	1.48177	0.286918	5.16443	2.41173e-07	1.23352e-06	-0.179156	0.315952	-0.567035	0.57069	0.807669
FBgn0003129	Poxm	0.827353	-0.788124	2.87892	-0.273757	0.784271	NA	-1.08483	3.04838	-0.355872	0.721936	NA
FBgn0003130	Poxn	9.88648	-0.516565	0.887401	-0.58211	0.560492	0.66384	0.52258	0.877314	0.595659	0.551403	NA
FBgn0003132	Pp1-13C	0	NA	NA	NA	NA	NA	NA	NA	NA	NA	NA
FBgn0003134	Pp1alpha-96A	661.004	-0.413775	0.167618	-2.46856	0.0135657	0.0310423	-0.179532	0.169164	-1.06129	0.288559	0.57684
FBgn0003137	Ppn	609.312	-0.31064	0.17606	-1.7644	0.0776649	0.139601	-0.0510016	0.177575	-0.287211	0.773951	0.918142
FBgn0003139	PpV	886.596	-0.240344	0.144852	-1.65924	0.097068	0.166859	-0.283539	0.146922	-1.92986	0.0536237	0.197055
FBgn0003140	PpY-55A	0	NA	NA	NA	NA	NA	NA	NA	NA	NA	NA
FBgn0003141	pr	352.847	-0.7982	0.181786	-4.39089	1.12888e-05	4.58836e-05	-0.287602	0.183168	-1.57016	0.116378	0.336161
FBgn0003145	prd	0	NA	NA	NA	NA	NA	NA	NA	NA	NA	NA
FBgn0003149	Prm	974.142	-0.79503	0.157069	-5.06165	4.15646e-07	2.07584e-06	0.0397181	0.156817	0.253277	0.800054	0.929615
FBgn0003159	CG2841	3537.29	-0.165356	0.156367	-1.05749	0.29029	0.403267	0.112579	0.15665	0.718663	0.472349	0.742683
FBgn0003162	Pu	7.02528	-0.733035	1.01339	-0.723352	0.469464	0.582514	-0.701311	1.05161	-0.66689	0.504843	NA
FBgn0003165	pum	260.39	0.0539967	0.210014	0.25711	0.797094	0.858686	0.197893	0.213314	0.927708	0.353559	0.641824
FBgn0003169	put	995.178	-0.952162	0.134771	-7.06503	1.60582e-12	1.37135e-11	-0.139115	0.134554	-1.0339	0.301182	0.589881
FBgn0003174	pwn	1.80868	0.699193	2.09497	0.333748	0.738569	0.814166	-1.64041	2.49275	-0.658076	0.51049	NA
FBgn0003175	px	1937.24	0.305397	0.130708	2.33649	0.0194657	0.042609	-0.0606098	0.13211	-0.458781	0.646391	0.852155
FBgn0003187	qua	3.7131	0.194456	1.6732	0.116218	0.90748	0.939667	-0.0880066	1.72691	-0.050962	0.959356	NA
FBgn0003189	r	742.447	-0.189761	0.145246	-1.30648	0.191388	0.291101	-0.275104	0.14791	-1.85994	0.0628933	0.221431
FBgn0003204	ras	1457.56	-0.583512	0.149477	-3.90368	9.47405e-05	0.000334116	-0.0396094	0.149795	-0.264424	0.791453	0.9257
FBgn0003205	Ras85D	1226.58	0.307787	0.110825	2.77723	0.00548251	0.0138772	0.152969	0.112847	1.35555	0.175243	0.43541
FBgn0003206	Ras64B	283.837	-0.198845	0.179152	-1.10992	0.267033	0.378463	0.036119	0.182266	0.198167	0.842914	0.947182
FBgn0003209	raw	1989.56	0.790519	0.21205	3.72798	0.00019302	0.000644	0.729509	0.212614	3.43114	0.000601059	0.00589435
FBgn0003210	rb	536.936	0.0300984	0.155612	0.19342	0.84663	0.893668	-0.136325	0.15913	-0.856687	0.391618	0.671971
FBgn0003218	rdgB	400.705	-1.46385	0.189255	-7.7348	1.03565e-14	1.05215e-13	-0.0473156	0.185943	-0.254463	0.799138	0.929069
FBgn0003227	rec	20.3449	1.26917	0.654772	1.93835	0.0525811	0.100937	1.12073	0.675825	1.65832	0.097253	NA
FBgn0003231	ref(2)P	11765.9	0.276396	0.0991078	2.78884	0.00528974	0.0134318	0.814141	0.0991581	8.21053	2.20215e-16	3.73735e-14
FBgn0003248	Rh2	0.11735	0.645466	4.99681	0.129176	0.897219	NA	0	4.99745	0	1	NA
FBgn0003249	Rh3	5.4326	4.33735	2.3763	1.82525	0.0679631	0.12526	5.70343	2.36453	2.41207	0.0158621	NA
FBgn0003250	Rh4	5.52275	0.868852	1.3971	0.621898	0.534009	0.641168	1.36449	1.40575	0.970649	0.331723	NA
FBgn0003254	rib	0.64083	-0.790285	2.99431	-0.263929	0.791835	NA	-2.50528	3.16331	-0.79198	0.428372	NA
FBgn0003255	rk	2.57694	0.960568	2.08503	0.460697	0.645016	0.737881	0.434813	2.15403	0.20186	0.840026	NA
FBgn0003256	rl	2041.22	-0.282087	0.119402	-2.3625	0.0181524	0.0400462	0.309572	0.11953	2.58991	0.00960002	0.053258
FBgn0003257	r-l	1021.71	0.422285	0.161259	2.61868	0.00882702	0.0212065	-0.938919	0.166353	-5.64415	1.66003e-08	6.57372e-07
FBgn0003261	Rm62	14230.2	-0.168055	0.104748	-1.60437	0.108632	0.183115	-0.0600264	0.104869	-0.572394	0.567055	0.806316
FBgn0003267	ro	1.48819	-0.24091	2.56349	-0.0939774	0.925127	0.951776	0.755783	2.53606	0.298015	0.765692	NA
FBgn0003268	rod	101.374	0.383862	0.292026	1.31448	0.188685	0.287622	0.510585	0.298239	1.712	0.0868973	0.276238
FBgn0003270	amos	0.116502	0.640197	4.99719	0.128111	0.898061	NA	0	4.99745	0	1	NA
FBgn0003274	RpLP2	40490.3	-1.23709	0.0830752	-14.8913	3.75677e-50	1.82449e-48	-0.522484	0.0830776	-6.28911	3.19287e-10	1.98149e-08
FBgn0003275	RpII18	481.704	-0.416424	0.17585	-2.36806	0.0178814	0.0395492	-0.232539	0.178191	-1.305	0.191892	0.457504
FBgn0003277	RpII215	1565.11	-0.0768195	0.152648	-0.503245	0.614792	0.712005	0.194438	0.153285	1.26848	0.204628	0.475864
FBgn0003278	RpI135	435.206	0.4634	0.226025	2.05021	0.0403435	0.0806637	0.158713	0.22933	0.692072	0.488892	0.75539
FBgn0003279	RpL4	36181.5	-0.88509	0.0941086	-9.40498	5.20397e-21	7.50136e-20	-0.329321	0.0941292	-3.49861	0.000467685	0.0048374
FBgn0003285	rst	6.12882	-1.5294	1.10071	-1.38947	0.16469	0.257774	-0.022427	1.03166	-0.0217389	0.982656	NA
FBgn0003292	rt	1.12529	-1.76912	3.32674	-0.531787	0.594873	NA	0.617791	3.10663	0.198862	0.84237	NA
FBgn0003295	ru	1.58519	4.22292	2.56336	1.64742	0.0994723	0.17026	1.36469	2.90504	0.469768	0.638521	NA
FBgn0003300	run	0.983262	3.25544	3.06605	1.06177	0.288339	NA	1.69536	3.30526	0.512929	0.608001	NA
FBgn0003301	rut	413.981	-1.0287	0.245592	-4.18866	2.80612e-05	0.000107103	-0.630003	0.247069	-2.54991	0.0107751	0.0584894
FBgn0003302	rux	87.8341	0.140374	0.283691	0.494812	0.620733	0.71649	-0.343098	0.300109	-1.14325	0.252937	0.537273
FBgn0003308	ry	1162.33	-0.769782	0.527634	-1.45893	0.144584	0.232	-1.02627	0.528337	-1.94245	0.0520825	0.193616
FBgn0003310	S	286.847	0.162974	0.174858	0.932037	0.351317	0.466658	0.0373567	0.180229	0.207273	0.835797	0.945084
FBgn0003312	sad	4.54275	-1.11659	1.16286	-0.960212	0.336948	0.452267	-0.391912	1.16286	-0.337023	0.736099	NA
FBgn0003313	sala	0.868523	-1.42658	4.02262	-0.354639	0.72286	NA	-3.14262	4.15043	-0.75718	0.448942	NA
FBgn0003317	sax	550.909	-0.0428781	0.151587	-0.282861	0.777284	0.844835	0.20185	0.153492	1.31505	0.188493	0.452151
FBgn0003319	Sb	0.21147	-2.28233	4.99094	-0.457295	0.647459	NA	-1.54913	4.99094	-0.310389	0.756265	NA
FBgn0003321	sbr	1474.12	-0.0503201	0.131491	-0.382688	0.701951	0.785505	-0.0619325	0.132774	-0.466451	0.640892	0.848267
FBgn0003326	sca	9.26705	-2.38421	1.02311	-2.33035	0.0197876	0.0432315	0.688794	0.835878	0.824035	0.409919	NA
FBgn0003328	scb	8057.49	1.27061	0.114501	11.0969	1.29835e-28	2.77649e-27	0.697709	0.114908	6.07189	1.26411e-09	6.57023e-08
FBgn0003330	Sce	285.28	0.429578	0.181693	2.36431	0.0180639	0.0399018	-0.00647382	0.188897	-0.0342716	0.972661	0.993325
FBgn0003334	Scm	487.06	0.55487	0.146837	3.77882	0.000157572	0.000534828	-0.0149172	0.152443	-0.0978544	0.922048	0.976261
FBgn0003339	Scr	0.68025	1.19433	3.51413	0.339865	0.733958	NA	-1.52613	3.72972	-0.409179	0.682408	NA
FBgn0003345	sd	1623.67	0.465735	0.128798	3.61601	0.000299177	0.000964438	0.328189	0.129998	2.52456	0.0115843	0.0619915
FBgn0003346	RanGAP	446.58	1.21522	0.163864	7.41601	1.20698e-13	1.11703e-12	0.0463786	0.172228	0.269286	0.78771	0.924703
FBgn0003353	sei	24.928	0.536611	0.52539	1.02136	0.307085	0.421248	-0.244617	0.559373	-0.437305	0.66189	0.861901
FBgn0003356	Jon99Cii	112538	-2.33937	0.151186	-15.4734	5.24354e-54	2.82363e-52	0.192032	0.151126	1.27067	0.203846	0.474925
FBgn0003357	Jon99Ciii	204489	-2.30524	0.148416	-15.5323	2.09764e-54	1.1414e-52	0.10058	0.148385	0.677827	0.497881	0.759703
FBgn0003358	Jon99Ci	37129.3	-2.32163	0.153671	-15.1078	1.43778e-51	7.25383e-50	-0.128056	0.153528	-0.834092	0.404229	0.68408
FBgn0003360	sesB	41399.1	-0.5661	0.12415	-4.55979	5.12038e-06	2.1801e-05	-0.587258	0.124206	-4.7281	2.26634e-06	5.30898e-05
FBgn0003366	sev	8.72599	-0.723213	0.859742	-0.841198	0.400237	0.515448	-0.615398	0.892384	-0.689612	0.490438	NA
FBgn0003371	sgg	3322.16	-0.217654	0.110505	-1.96963	0.048881	0.0947623	0.12501	0.110775	1.1285	0.259107	0.545621
FBgn0003372	Sgs1	0.536306	2.22488	3.79081	0.586913	0.557262	NA	1.36107	3.96523	0.34325	0.73141	NA
FBgn0003373	Sgs3	0.11735	0.645466	4.99681	0.129176	0.897219	NA	0	4.99745	0	1	NA
FBgn0003374	Sgs4	0.116502	0.640197	4.99719	0.128111	0.898061	NA	0	4.99745	0	1	NA
FBgn0003375	Sgs5	0	NA	NA	NA	NA	NA	NA	NA	NA	NA	NA
FBgn0003377	Sgs7	0	NA	NA	NA	NA	NA	NA	NA	NA	NA	NA
FBgn0003378	Sgs8	0.352051	2.23156	4.85642	0.459509	0.645869	NA	0	4.99745	0	1	NA
FBgn0003380	Sh	16.953	-0.208598	0.717968	-0.29054	0.771403	0.840112	-0.805416	0.736655	-1.09334	0.274244	NA
FBgn0003382	sha	47.2442	-0.210431	0.391732	-0.53718	0.591143	0.692176	-0.822604	0.418932	-1.96357	0.0495796	0.186732
FBgn0003386	Shaw	85.7176	-0.579878	0.294109	-1.97165	0.04865	0.0943672	-0.460541	0.300421	-1.53299	0.125279	0.3509
FBgn0003388	shd	115.88	-1.92438	0.332035	-5.79573	6.80231e-09	4.15129e-08	-1.44563	0.335523	-4.30858	1.64309e-05	0.000283484
FBgn0003390	shf	497.623	-2.91671	0.173869	-16.7753	3.7011e-63	2.49776e-61	-1.19096	0.165276	-7.20589	5.76674e-13	5.70907e-11
FBgn0003391	shg	851.058	0.556088	0.139274	3.99277	6.53049e-05	0.000235501	0.20667	0.14208	1.4546	0.14578	0.386699
FBgn0003392	shi	1999.01	0.365032	0.128887	2.83218	0.00462313	0.0118735	0.320299	0.129772	2.46817	0.0135806	0.0703651
FBgn0003396	shn	1708.38	0.250693	0.136458	1.83714	0.066189	0.122533	0.377332	0.137278	2.74867	0.00598368	0.0369322
FBgn0003401	shu	38.3772	2.43086	0.477023	5.09589	3.47109e-07	1.74613e-06	0.508408	0.525626	0.967244	0.333422	0.622527
FBgn0003410	sina	363.193	-0.224946	0.168727	-1.33319	0.182468	0.280199	-0.138241	0.172218	-0.802707	0.422144	0.701737
FBgn0003411	sisA	13.4971	0.761252	0.685475	1.11055	0.266763	0.378184	-1.13632	0.802773	-1.41549	0.156925	NA
FBgn0003415	skd	788.864	1.46267	0.129056	11.3336	8.94534e-30	2.06598e-28	0.320535	0.134646	2.38058	0.0172852	0.0851058
FBgn0003416	sl	598.976	-0.164385	0.139642	-1.17719	0.239119	0.346751	0.204686	0.141024	1.45143	0.14666	0.387696
FBgn0003423	slgA	31.9489	-0.423187	0.467118	-0.905952	0.364961	0.480398	-0.495888	0.480935	-1.03109	0.302498	0.590803
FBgn0003429	slo	355.595	-1.53707	0.282023	-5.45015	5.0328e-08	2.77191e-07	0.211335	0.277374	0.761915	0.446111	0.722183
FBgn0003430	slp1	0.233852	1.64172	4.89224	0.335576	0.737191	NA	0	4.99745	0	1	NA
FBgn0003435	sm	121.112	0.137915	0.293811	0.469402	0.638783	0.732686	0.0956254	0.298008	0.320883	0.748299	0.906763
FBgn0003444	smo	97.9393	-0.651747	0.294371	-2.21404	0.0268263	0.0565965	0.0538236	0.29475	0.182608	0.855106	0.951728
FBgn0003447	sn	62.8577	-0.476549	0.357321	-1.33367	0.182312	0.280001	0.0770754	0.359771	0.214235	0.830364	0.942778
FBgn0003448	sna	4.52626	0.939569	1.28308	0.732277	0.463999	0.577457	-0.357846	1.40212	-0.255217	0.798555	NA
FBgn0003449	snf	691.344	-0.0184003	0.129602	-0.141976	0.887099	0.924551	-0.0950966	0.132573	-0.717315	0.47318	0.743707
FBgn0003450	snk	0.11735	0.645466	4.99681	0.129176	0.897219	NA	0	4.99745	0	1	NA
FBgn0003459	stwl	249.812	0.0428337	0.222132	0.192831	0.847092	0.89388	0.00292258	0.226409	0.0129084	0.989701	0.997092
FBgn0003460	so	5.52657	-1.06745	1.17543	-0.908135	0.363807	0.479159	-0.357336	1.17682	-0.303646	0.761398	NA
FBgn0003462	Sod1	6690.15	-1.22004	0.116524	-10.4702	1.18341e-25	2.22006e-24	-0.225212	0.116398	-1.93484	0.0530098	0.195914
FBgn0003463	sog	153.388	0.00053552	0.225992	0.00236963	0.998109	0.999552	-0.638	0.239742	-2.66119	0.00778648	0.0451551
FBgn0003464	sol	1694.55	1.22062	0.117778	10.3638	3.62464e-25	6.70301e-24	0.226303	0.1205	1.87803	0.0603773	0.214939
FBgn0003475	spir	2147.26	-0.250971	0.111454	-2.25179	0.0243355	0.0519126	-0.151484	0.112117	-1.35113	0.176655	0.437456
FBgn0003479	spn-A	134.417	0.670298	0.254477	2.63402	0.00843804	0.0203898	0.293922	0.264081	1.113	0.265709	0.551856
FBgn0003480	spn-B	34.3607	-0.369024	0.436166	-0.846061	0.397519	0.512773	-0.0307741	0.445214	-0.0691219	0.944893	0.985542
FBgn0003482	spn-D	12.1777	0.130614	0.779057	0.167656	0.866854	0.908095	0.0461045	0.806657	0.057155	0.954422	NA
FBgn0003483	spn-E	12.1689	0.176194	0.790863	0.222787	0.823701	0.876761	0.461109	0.805239	0.572636	0.566891	NA
FBgn0003486	spo	4.16073	-2.49257	1.34257	-1.85656	0.0633737	0.118248	-2.96421	1.55788	-1.90273	0.0570763	NA
FBgn0003495	spz	12.1132	0.296775	0.819636	0.362081	0.717291	0.796862	-0.615648	0.879299	-0.700157	0.483829	NA
FBgn0003499	sr	20.3129	0.68767	0.81341	0.845416	0.397878	0.513173	2.20527	0.801049	2.75298	0.00590555	NA
FBgn0003502	Btk29A	247.62	0.317158	0.200005	1.58575	0.112796	0.188956	0.0590624	0.206343	0.286234	0.774699	0.918636
FBgn0003507	srp	357.017	-1.49945	0.216819	-6.91567	4.6566e-12	3.84706e-11	-0.62504	0.216707	-2.88426	0.00392337	0.0266776
FBgn0003510	Sry-alpha	54.8745	2.59532	0.479352	5.41423	6.15525e-08	3.36618e-07	-0.00508597	0.53677	-0.00947515	0.99244	0.997943
FBgn0003511	Sry-beta	93.3149	0.255085	0.28578	0.892592	0.372076	0.487763	0.263728	0.294177	0.896496	0.369988	0.654679
FBgn0003512	Sry-delta	442.446	0.34732	0.14913	2.32898	0.0198601	0.0433809	-0.107182	0.155021	-0.691404	0.489312	0.755499
FBgn0003513	ss	0.994859	3.3269	3.08339	1.07898	0.280598	NA	1.59188	3.33099	0.477901	0.632721	NA
FBgn0003514	sqh	4921.87	0.744686	0.0883501	8.42881	3.49196e-17	4.0686e-16	0.258573	0.0892007	2.89877	0.00374626	0.0256834
FBgn0003515	st	9.63073	0.521155	1.10671	0.470905	0.637708	0.731777	2.05819	1.08431	1.89816	0.0576746	NA
FBgn0003517	sta	38775.2	-1.1729	0.0828566	-14.1557	1.72111e-45	7.64421e-44	-0.466626	0.08286	-5.6315	1.78653e-08	6.99634e-07
FBgn0003520	stau	560.215	-0.219145	0.146398	-1.49691	0.134416	0.218313	0.172672	0.147644	1.16952	0.242194	0.525801
FBgn0003525	stg	25.3158	1.39599	0.65469	2.13229	0.0329834	0.0676794	0.125787	0.69341	0.181403	0.856051	0.951728
FBgn0003527	stil	0.759598	-0.238646	2.79508	-0.0853809	0.931959	NA	-2.52296	3.03329	-0.831756	0.405547	NA
FBgn0003545	sub	22.2196	1.51061	0.646518	2.33652	0.019464	0.042609	0.440633	0.683897	0.644298	0.519382	0.773231
FBgn0003557	Su(dx)	4769.93	1.0397	0.119554	8.69647	3.42361e-18	4.22584e-17	0.49331	0.120219	4.10343	4.07064e-05	0.000608839
FBgn0003559	su(f)	509.564	0.255179	0.17072	1.49472	0.134987	0.218966	0.153999	0.173792	0.886109	0.375559	0.657411
FBgn0003567	su(Hw)	894.229	0.0179545	0.116504	0.154111	0.877522	0.916224	0.402508	0.11761	3.42239	0.000620727	0.00603033
FBgn0003575	su(sable)	1369.87	0.66656	0.168139	3.96433	7.3601e-05	0.000263317	-0.110364	0.170315	-0.648	0.516985	0.771027
FBgn0003598	Su(var)3-7	300.807	0.0287918	0.180337	0.159656	0.873152	0.912853	-0.0675792	0.185199	-0.364901	0.715185	0.891375
FBgn0003607	Su(var)205	1159.81	-0.280507	0.131098	-2.13966	0.0323819	0.0666162	-0.164606	0.132476	-1.24254	0.214039	0.489058
FBgn0003612	Su(var)2-10	609.951	0.309226	0.164147	1.88383	0.0595875	0.112333	-0.0125428	0.167509	-0.0748784	0.940311	0.983601
FBgn0003638	su(w[a])	2182.99	-0.477687	0.10281	-4.6463	3.37937e-06	1.47571e-05	-0.41336	0.103895	-3.97864	6.93112e-05	0.000962257
FBgn0003651	svp	9.96053	-2.13399	0.904946	-2.35814	0.0183666	0.0404489	-1.45398	0.922032	-1.57693	0.114811	NA
FBgn0003654	sw	1856.49	-0.00420258	0.102782	-0.0408884	0.967385	0.978905	0.329743	0.103458	3.18721	0.0014365	0.0119598
FBgn0003655	swa	18.2752	-0.41919	0.61698	-0.679423	0.49687	0.607955	-0.522293	0.644099	-0.810889	0.417429	NA
FBgn0003656	sws	1626.13	-0.924101	0.207652	-4.45025	8.57705e-06	3.54297e-05	0.117382	0.207363	0.566068	0.571347	0.808087
FBgn0003660	Syb	6859.04	-0.131294	0.10446	-1.25689	0.208795	0.311246	0.187333	0.104686	1.78947	0.0735384	0.245699
FBgn0003676	CCT1	5022.7	0.54359	0.0997675	5.44857	5.07757e-08	2.79361e-07	-0.324228	0.100877	-3.21411	0.00130848	0.0111375
FBgn0003683	term	0	NA	NA	NA	NA	NA	NA	NA	NA	NA	NA
FBgn0003687	Tbp	183.466	0.634176	0.224047	2.83055	0.00464681	0.0119204	0.206319	0.232694	0.886653	0.375266	0.65738
FBgn0003701	thr	31.6249	0.145193	0.546847	0.26551	0.790616	0.853701	0.21135	0.55953	0.377728	0.705632	0.88628
FBgn0003710	tipE	6.05469	0.598293	1.17265	0.510206	0.609907	0.707768	-0.422739	1.26024	-0.335444	0.73729	NA
FBgn0003714	tko	735.751	-0.638348	0.141529	-4.51037	6.47152e-06	2.71751e-05	-0.409884	0.143443	-2.85748	0.00427023	0.0283184
FBgn0003716	tkv	1642.04	-0.965708	0.169082	-5.71149	1.11992e-08	6.64722e-08	-0.210525	0.169019	-1.24557	0.212921	0.488097
FBgn0003719	tld	0.330282	-0.871103	4.98936	-0.174592	0.8614	NA	-1.568	4.98965	-0.31425	0.753331	NA
FBgn0003720	tll	0.196233	-2.22791	4.99472	-0.446054	0.655558	NA	-1.49472	4.99472	-0.299259	0.764742	NA
FBgn0003721	Tm1	7956.38	0.200594	0.0909432	2.20571	0.0274041	0.0576691	0.177306	0.0913041	1.94193	0.052146	0.193716
FBgn0003731	Egfr	431.204	-1.35285	0.187709	-7.20721	5.71118e-13	5.00897e-12	-0.200178	0.185478	-1.07925	0.280475	0.568469
FBgn0003733	tor	7.48109	-0.202187	1.00109	-0.201966	0.839943	0.888864	-0.806679	1.06878	-0.754764	0.45039	NA
FBgn0003741	tra	209.861	0.171281	0.193797	0.88382	0.376793	0.492271	-0.0750377	0.202604	-0.370366	0.711109	0.888715
FBgn0003742	tra2	361.806	-0.071821	0.1732	-0.41467	0.678383	0.765187	0.183466	0.17575	1.0439	0.29653	0.584763
FBgn0003744	trc	892.517	0.116879	0.127519	0.91656	0.359373	0.474945	0.159639	0.12949	1.23283	0.217641	0.494911
FBgn0003747	Gr5a	7.54786	2.85979	1.1281	2.53506	0.0112429	0.0262167	-0.0909757	1.32576	-0.0686216	0.945291	NA
FBgn0003748	Treh	7043.78	0.152444	0.149978	1.01644	0.30942	0.423746	0.728774	0.150027	4.85762	1.18806e-06	2.95805e-05
FBgn0003751	trk	6.22628	1.12946	1.10016	1.02663	0.304594	0.41857	0.907896	1.13776	0.797968	0.424889	NA
FBgn0003861	trp	13.2958	-4.72765	1.76876	-2.67286	0.00752083	0.0184175	1.7068	1.04649	1.63097	0.102896	NA
FBgn0003862	trx	838.444	0.573865	0.249208	2.30275	0.0212929	0.0461998	0.244488	0.250799	0.974837	0.329641	0.620285
FBgn0003863	alphaTry	651373	-1.6492	0.133373	-12.3653	4.02512e-35	1.16203e-33	-0.271178	0.133369	-2.03329	0.0420231	0.164842
FBgn0003865	tsg	0	NA	NA	NA	NA	NA	NA	NA	NA	NA	NA
FBgn0003866	tsh	274.398	-0.550095	0.255612	-2.15207	0.0313918	0.0648747	0.137517	0.255867	0.537454	0.590954	0.819609
FBgn0003867	tsl	6.98316	-1.75484	1.10748	-1.58454	0.113071	0.189388	0.312386	1.06197	0.294158	0.768637	NA
FBgn0003870	ttk	809.955	0.957252	0.152875	6.26166	3.80912e-10	2.63921e-09	0.0924403	0.156873	0.589269	0.555681	0.799292
FBgn0003882	tub	592.416	-0.143407	0.136379	-1.05154	0.293013	0.406146	0.00575535	0.138794	0.041467	0.966924	0.990629
FBgn0003884	alphaTub84B	26762.7	0.644278	0.0889068	7.24667	4.27158e-13	3.77505e-12	-0.167436	0.0891265	-1.87863	0.0602954	0.214739
FBgn0003885	alphaTub84D	1648.98	0.127977	0.120659	1.06065	0.288848	0.401982	-0.187216	0.122458	-1.52882	0.12631	0.352718
FBgn0003886	alphaTub85E	0.52502	-1.79799	3.86431	-0.465281	0.641731	NA	-2.51085	3.86511	-0.649618	0.515939	NA
FBgn0003888	betaTub60D	1672.77	1.71182	0.145325	11.7792	4.99633e-32	1.24824e-30	1.01158	0.146963	6.88322	5.85135e-12	5.23224e-10
FBgn0003889	betaTub85D	0.58504	2.96459	4.40986	0.672265	0.501415	NA	0	4.59479	0	1	NA
FBgn0003890	betaTub97EF	4942.76	-0.0309653	0.0931873	-0.332291	0.73967	0.815119	-0.0419101	0.0937237	-0.447167	0.654755	0.857708
FBgn0003891	tud	3221.34	-0.618767	0.123423	-5.01339	5.34807e-07	2.61935e-06	0.156246	0.123394	1.26623	0.20543	0.476418
FBgn0003892	ptc	235.439	-1.52912	0.232813	-6.56801	5.09915e-11	3.84862e-10	-0.762555	0.232534	-3.27933	0.00104056	0.00933469
FBgn0003896	tup	6.17256	0.21725	1.11912	0.194126	0.846077	0.893354	0.891952	1.13185	0.788048	0.430668	NA
FBgn0003900	twi	0.522843	-1.64396	3.87486	-0.424262	0.671375	NA	-2.4589	3.88487	-0.632944	0.52677	NA
FBgn0003941	RpL40	22274.6	-1.06788	0.0994129	-10.7418	6.47357e-27	1.27666e-25	-0.360422	0.0994164	-3.62538	0.000288537	0.00323815
FBgn0003942	RpS27A	30734.6	-1.38706	0.116091	-11.948	6.64786e-33	1.74033e-31	-0.483729	0.116073	-4.16745	3.08024e-05	0.000484221
FBgn0003943	Ubi-p63E	9835.05	0.92455	0.140915	6.56104	5.34329e-11	4.02412e-10	0.415517	0.141187	2.94302	0.00325027	0.0228095
FBgn0003944	Ubx	25.1043	-1.03128	0.540979	-1.90632	0.0566081	0.107457	-0.485567	0.53969	-0.899714	0.368273	0.652841
FBgn0003950	unc	5.18645	2.46112	1.33606	1.84208	0.0654639	0.121299	0.902963	1.43859	0.627674	0.530218	NA
FBgn0003961	Uro	191.145	0.153434	1.64735	0.0931397	0.925793	0.952367	3.0029	1.64468	1.82582	0.0678774	0.232978
FBgn0003963	ush	229.181	1.08032	0.279694	3.86251	0.000112227	0.000391403	-0.200483	0.290891	-0.689202	0.490696	0.756188
FBgn0003964	usp	689.53	-0.00859131	0.130022	-0.0660757	0.947318	0.965432	0.0345392	0.132537	0.260601	0.794401	0.927051
FBgn0003965	v	7.37249	-2.26008	1.12934	-2.00125	0.0453656	0.0889929	-0.00951316	1.02514	-0.00927982	0.992596	NA
FBgn0003969	vap	504.445	0.834771	0.15727	5.30789	1.10899e-07	5.91669e-07	0.55658	0.160996	3.4571	0.000546013	0.00544442
FBgn0003975	vg	0.535634	2.23294	3.792	0.588857	0.555957	NA	1.34837	3.96558	0.340018	0.733843	NA
FBgn0003977	vir	423.208	0.525114	0.153127	3.42928	0.000605188	0.00185647	0.0316414	0.15915	0.198815	0.842407	0.947182
FBgn0003978	vls	217.496	0.920598	0.192587	4.78016	1.75153e-06	7.9388e-06	0.046767	0.204653	0.228519	0.819243	0.938842
FBgn0003979	Vm26Aa	2.89559	2.92259	2.41623	1.20957	0.226445	0.33222	2.51835	2.4548	1.02589	0.304943	NA
FBgn0003980	Vm26Ab	1.00813	3.45827	3.93073	0.879802	0.378967	NA	1.35243	4.14693	0.326128	0.744327	NA
FBgn0003983	Vm34Ca	2.24152	1.38106	1.72455	0.800822	0.423234	0.537998	0.930914	1.80645	0.515327	0.606324	NA
FBgn0003984	vn	180.842	4.36147	0.346258	12.596	2.2211e-36	6.82955e-35	0.174323	0.401332	0.43436	0.664027	0.862447
FBgn0003996	w	13.0366	-1.4013	1.00645	-1.39232	0.163826	0.256615	1.10592	0.943691	1.1719	0.241236	NA
FBgn0003997	hid	75.9459	1.1691	0.323065	3.61876	0.000296014	0.000955131	-0.0197083	0.347611	-0.0566965	0.954787	0.988793
FBgn0004003	wbl	0.902632	3.14909	3.14668	1.00077	0.316939	NA	1.56173	3.38515	0.461346	0.644551	NA
FBgn0004034	y	0.322049	0.642085	4.99705	0.128493	0.897759	NA	1.43097	4.98847	0.286855	0.774224	NA
FBgn0004045	Yp1	2583.13	-2.04677	0.273176	-7.49251	6.75673e-14	6.39551e-13	-0.0989849	0.272291	-0.363526	0.716212	0.891675
FBgn0004047	Yp3	1006.16	-1.07592	0.291968	-3.68505	0.000228655	0.000755376	0.111588	0.291373	0.382973	0.70174	0.883189
FBgn0004049	yrt	702.42	0.341462	0.14055	2.42947	0.0151211	0.0342308	0.380116	0.142702	2.66371	0.00772845	0.0449439
FBgn0004050	z	438.116	0.48428	0.194349	2.49181	0.0127095	0.0293078	-0.0337214	0.199086	-0.169381	0.865497	0.955621
FBgn0004052	Z600	2.4582	5.0356	2.48811	2.02386	0.0429843	0.0849146	0	2.85885	0	1	NA
FBgn0004053	zen	0	NA	NA	NA	NA	NA	NA	NA	NA	NA	NA
FBgn0004054	zen2	0	NA	NA	NA	NA	NA	NA	NA	NA	NA	NA
FBgn0004055	uzip	88.5237	0.572801	0.34384	1.66589	0.0957344	0.165113	-0.0586742	0.357974	-0.163906	0.869805	0.957441
FBgn0004057	Zw	646.401	-0.166024	0.198138	-0.837923	0.402074	0.517172	-0.243064	0.200353	-1.21318	0.225061	0.503121
FBgn0004066	Prosalpha4	2612.22	-0.123176	0.109364	-1.12629	0.260044	0.370682	-0.148129	0.110276	-1.34325	0.17919	0.441002
FBgn0004087	Dhfr	264.866	-0.603795	0.206422	-2.92506	0.00344391	0.0091261	-0.440058	0.210314	-2.09238	0.0364045	0.148184
FBgn0004101	bs	339.572	0.532678	0.193978	2.74607	0.00603141	0.0151229	0.192386	0.19878	0.967837	0.333126	0.622527
FBgn0004102	oc	0.913427	-1.78659	2.67994	-0.666652	0.504995	NA	-0.0685023	2.48061	-0.0276151	0.977969	NA
FBgn0004103	Pp1-87B	5653.37	0.0521481	0.101544	0.513552	0.607565	0.705651	0.123765	0.101912	1.21443	0.224583	0.502457
FBgn0004106	Cdk1	36.5276	1.48566	0.466428	3.18519	0.00144661	0.00412698	0.62191	0.493115	1.26119	0.207242	0.478995
FBgn0004107	Cdk2	65.1111	0.865521	0.333089	2.59847	0.00936412	0.0223522	0.158772	0.355147	0.447059	0.654832	0.857708
FBgn0004108	Nrt	129.434	-0.917085	0.245	-3.74321	0.000181685	0.000610296	0.119972	0.240748	0.498329	0.618252	0.834918
FBgn0004110	tin	0.204461	0	4.99745	0	1	NA	1.4276	4.9887	0.286166	0.774751	NA
FBgn0004117	Tm2	898.114	-1.31275	0.128716	-10.1988	2.00784e-24	3.54889e-23	-0.103319	0.126974	-0.813698	0.415818	0.696278
FBgn0004118	nAChRbeta2	0.475328	-0.194681	4.01165	-0.0485289	0.961295	NA	-1.78708	4.13932	-0.431732	0.665936	NA
FBgn0004132	boca	269.335	-0.144146	0.186354	-0.773505	0.439224	0.553383	-0.442436	0.193662	-2.28458	0.0223374	0.103659
FBgn0004133	blow	38.9002	0.341229	0.433799	0.786605	0.431513	0.546117	-0.513929	0.464266	-1.10697	0.268306	0.554496
FBgn0004143	nullo	0.196233	-2.22791	4.99472	-0.446054	0.655558	NA	-1.49472	4.99472	-0.299259	0.764742	NA
FBgn0004167	kst	18915.9	0.358434	0.203641	1.76012	0.0783867	0.140582	0.4705	0.203691	2.30987	0.0208953	0.0986314
FBgn0004168	5-HT1A	21.2022	-1.7945	0.608731	-2.94794	0.00319896	0.00852932	-0.651941	0.592633	-1.10008	0.271299	0.558163
FBgn0004169	up	1269.33	-1.30656	0.115022	-11.3592	6.67811e-30	1.54578e-28	0.0504353	0.113267	0.445278	0.656119	0.858794
FBgn0004170	sc	17.0634	0.878755	0.644715	1.36301	0.172878	0.268008	0.817592	0.664725	1.22997	0.218708	NA
FBgn0004171	Mst98Cb	0.312685	-0.785629	4.99446	-0.1573	0.875008	NA	-1.49415	4.9947	-0.299147	0.764828	NA
FBgn0004172	Mst84Da	0	NA	NA	NA	NA	NA	NA	NA	NA	NA	NA
FBgn0004173	Mst84Db	0	NA	NA	NA	NA	NA	NA	NA	NA	NA	NA
FBgn0004174	Mst84Dc	0	NA	NA	NA	NA	NA	NA	NA	NA	NA	NA
FBgn0004175	Mst84Dd	0	NA	NA	NA	NA	NA	NA	NA	NA	NA	NA
FBgn0004177	mts	7331.29	-0.179875	0.0973752	-1.84723	0.0647138	0.120269	0.158217	0.0975336	1.62218	0.104764	0.314508
FBgn0004179	Csp	3995.79	0.351945	0.103642	3.39578	0.000684327	0.00207474	0.263256	0.104265	2.52487	0.0115741	0.0619915
FBgn0004181	Ebp	0	NA	NA	NA	NA	NA	NA	NA	NA	NA	NA
FBgn0004197	Ser	0.928768	-1.83596	2.97722	-0.616669	0.537453	NA	-0.133201	2.79813	-0.0476036	0.962032	NA
FBgn0004198	ct	9.45297	-1.77404	1.02117	-1.73727	0.0823398	0.146408	0.720423	0.926565	0.77752	0.436852	NA
FBgn0004227	nonA	1000.19	0.367936	0.122867	2.99459	0.00274815	0.0074263	-0.00949922	0.125333	-0.0757921	0.939585	0.983575
FBgn0004228	mex1	5792.68	0.307796	0.142992	2.15254	0.0313548	0.064824	0.375365	0.143235	2.62062	0.00877696	0.0497202
FBgn0004237	Hrb87F	2391.81	0.0962034	0.108362	0.887798	0.37465	0.490148	-0.1662	0.109608	-1.51631	0.129442	0.357978
FBgn0004240	DptA	9.98049	3.85813	1.20668	3.19731	0.00138716	0.00397264	-0.680633	1.57151	-0.433107	0.664937	NA
FBgn0004242	Syt1	55.396	-0.491	0.400438	-1.22616	0.22014	0.324895	0.126311	0.403961	0.31268	0.754524	0.909169
FBgn0004244	Rdl	2.77431	3.67633	2.16685	1.69662	0.0897679	0.157169	-1.4965	2.58494	-0.578928	0.562637	NA
FBgn0004359	T48	19.4746	0.107502	0.616628	0.174339	0.861599	0.904139	0.0327728	0.638254	0.0513476	0.959049	NA
FBgn0004360	Wnt2	0.234701	1.64647	4.89189	0.336571	0.73644	NA	0	4.99745	0	1	NA
FBgn0004362	HmgD	697.518	0.969171	0.132998	7.28713	3.16636e-13	2.81988e-12	-0.377127	0.140714	-2.6801	0.00736	0.0433937
FBgn0004363	porin	20194.1	-0.00887729	0.112881	-0.0786428	0.937317	0.95919	-0.209088	0.113022	-1.84997	0.0643183	0.224736
FBgn0004364	18w	59.3664	0.170028	0.354148	0.480105	0.631153	0.72581	-0.243352	0.372249	-0.653734	0.513283	0.769231
FBgn0004367	mei-41	77.0313	0.535859	0.339505	1.57835	0.114484	0.191261	0.311471	0.350591	0.888415	0.374317	0.657251
FBgn0004368	Ptp4E	336.309	0.343105	0.165514	2.07297	0.0381749	0.0768155	0.507313	0.168516	3.01048	0.00260835	0.0191617
FBgn0004369	Ptp99A	999.497	-0.895448	0.13613	-6.57787	4.77231e-11	3.61506e-10	-0.0684661	0.135791	-0.504202	0.614119	0.832711
FBgn0004370	Ptp10D	76.3401	-0.2539	0.306245	-0.829075	0.407062	0.521973	-0.302943	0.316554	-0.957002	0.338566	0.626995
FBgn0004372	aly	0	NA	NA	NA	NA	NA	NA	NA	NA	NA	NA
FBgn0004373	fwd	1352.71	-0.0371636	0.176369	-0.210715	0.83311	0.883973	0.0456233	0.177231	0.257423	0.796852	0.928085
FBgn0004374	neb	172.632	0.928116	0.30469	3.0461	0.00231834	0.00635908	0.0641727	0.314347	0.204146	0.838239	0.946348
FBgn0004378	Klp61F	81.0203	1.43107	0.340258	4.20584	2.60116e-05	9.99033e-05	-0.0825493	0.367536	-0.224602	0.822289	0.939339
FBgn0004379	Klp67A	27.3542	0.857505	0.548108	1.56448	0.117705	0.195633	0.827398	0.56282	1.47009	0.141537	0.379072
FBgn0004380	Klp64D	617.286	0.513524	0.142955	3.59221	0.000327889	0.00105015	0.142744	0.146875	0.971873	0.331114	0.621375
FBgn0004381	Klp68D	192.316	1.03017	0.213757	4.81934	1.44037e-06	6.62085e-06	0.424538	0.223252	1.90161	0.0572218	0.206266
FBgn0004387	Klp98A	665.488	-0.75883	0.164591	-4.61041	4.0188e-06	1.73525e-05	0.155104	0.164008	0.945709	0.344297	0.632327
FBgn0004389	bnk	17.2381	3.87846	1.00462	3.86061	0.000113106	0.000394203	0.230474	1.15404	0.19971	0.841708	NA
FBgn0004390	RasGAP1	731.021	0.794908	0.127129	6.25278	4.03203e-10	2.7918e-09	0.42577	0.130589	3.26038	0.00111264	0.00984331
FBgn0004391	shtd	378.654	0.832924	0.175056	4.75805	1.95471e-06	8.78689e-06	0.336332	0.180593	1.86237	0.0625503	0.220691
FBgn0004394	pdm2	781.441	0.75785	0.178826	4.23792	2.256e-05	8.73568e-05	0.272792	0.181264	1.50494	0.132339	0.363331
FBgn0004395	unk	563.126	-0.666018	0.276204	-2.41133	0.0158946	0.0357715	-0.191766	0.276246	-0.694184	0.487567	0.754626
FBgn0004396	CrebA	792.607	-0.165895	0.145209	-1.14246	0.253263	0.362807	-0.211948	0.147467	-1.43726	0.150644	0.393728
FBgn0004397	Vinc	1084.78	0.716363	0.149522	4.79102	1.65937e-06	7.55734e-06	0.427462	0.151396	2.82347	0.00475068	0.0309613
FBgn0004400	rhi	2.70635	-4.12646	2.08191	-1.98206	0.047473	0.0925506	-1.82605	1.71933	-1.06207	0.288204	NA
FBgn0004401	Pep	3272.19	0.271048	0.0931678	2.90924	0.00362306	0.00957156	-0.228847	0.0945339	-2.4208	0.0154865	0.0779102
FBgn0004403	RpS14a	16184.4	-1.14442	0.118673	-9.6435	5.23732e-22	8.0401e-21	-0.42873	0.118679	-3.6125	0.000303254	0.00337147
FBgn0004404	RpS14b	6897.13	-1.17929	0.121393	-9.71469	2.61051e-22	4.06154e-21	-0.486501	0.121417	-4.00685	6.15337e-05	0.000870262
FBgn0004406	tam	228.361	0.630359	0.20271	3.10965	0.00187306	0.00523863	0.309808	0.20954	1.47851	0.139271	0.37464
FBgn0004407	DNApol-gamma35	563.383	0.666467	0.165426	4.02879	5.6065e-05	0.00020445	-0.156179	0.170931	-0.913698	0.360876	0.647436
FBgn0004414	msopa	0.936979	3.64403	3.65231	0.997733	0.318409	NA	0	3.89369	0	1	NA
FBgn0004419	me31B	2235.85	0.18325	0.137375	1.33394	0.182224	0.279908	-0.112664	0.138476	-0.813599	0.415875	0.696278
FBgn0004425	LysB	26569	-3.59286	0.420741	-8.53935	1.34975e-17	1.60871e-16	-0.291455	0.420534	-0.693058	0.488273	0.755016
FBgn0004426	LysC	6371.31	-2.88389	0.413525	-6.97392	3.08229e-12	2.58341e-11	0.23256	0.412891	0.563249	0.573265	0.809297
FBgn0004427	LysD	47850.2	-3.58523	0.453282	-7.90951	2.58412e-15	2.71324e-14	-0.122771	0.453167	-0.270917	0.786455	0.923882
FBgn0004428	LysE	13390.9	-3.87462	0.404279	-9.58403	9.33287e-22	1.41601e-20	-0.627551	0.403811	-1.55407	0.120167	0.343171
FBgn0004429	LysP	60.1685	-5.75672	1.80419	-3.19074	0.00141909	0.00405627	-4.61649	1.7884	-2.58136	0.00984132	0.054379
FBgn0004430	LysS	5.02834	-1.6373	1.36918	-1.19583	0.231765	0.33859	0.519636	1.27056	0.408981	0.682554	NA
FBgn0004431	LysX	424.962	7.66733	0.485279	15.7998	3.12001e-56	1.79151e-54	1.39966	0.556103	2.5169	0.0118391	0.0627897
FBgn0004432	Cyp1	16314.3	-0.361754	0.122937	-2.94259	0.00325477	0.00866467	-0.437755	0.123082	-3.55661	0.000375666	0.00403102
FBgn0004435	Galphaq	925.348	0.0584779	0.131816	0.443632	0.657309	0.747338	0.118973	0.133404	0.891829	0.372484	0.656186
FBgn0004436	Ubc6	2189.19	0.577822	0.119534	4.83396	1.3384e-06	6.17948e-06	0.465141	0.120231	3.86874	0.000109398	0.00142818
FBgn0004449	Ten-m	268.26	-0.726575	0.206592	-3.51695	0.000436541	0.00137027	-0.141534	0.207566	-0.681871	0.495321	0.75803
FBgn0004456	mew	1293.5	-0.802236	0.201587	-3.97961	6.90292e-05	0.000248071	-0.456255	0.202188	-2.25659	0.0240337	0.109635
FBgn0004463	RpIII128	462.479	0.305829	0.182379	1.67689	0.0935638	0.162506	0.155747	0.185698	0.838709	0.401633	0.681812
FBgn0004465	Su(P)	867.823	0.292948	0.132068	2.21816	0.026544	0.0560828	0.0150763	0.134899	0.11176	0.911013	0.97222
FBgn0004507	GlyP	2146.86	-0.208437	0.149992	-1.38965	0.164635	0.257727	0.00585597	0.150528	0.0389029	0.968968	0.9918
FBgn0004509	Fur1	1902.85	1.51698	0.110698	13.7038	9.63634e-43	3.82254e-41	0.585169	0.112653	5.19445	2.0533e-07	6.31747e-06
FBgn0004510	Ets97D	140.164	-0.15523	0.262672	-0.590964	0.554544	0.658522	-0.190528	0.269873	-0.70599	0.480194	0.748088
FBgn0004511	dy	0.184775	0	4.99745	0	1	NA	1.35386	4.99376	0.27111	0.786306	NA
FBgn0004512	Mdr49	4681.6	0.752878	0.185191	4.06542	4.79452e-05	0.00017714	0.216386	0.185651	1.16556	0.243794	0.526458
FBgn0004513	Mdr65	1.04375	0.641233	4.04539	0.158509	0.874055	NA	3.63302	3.83714	0.946805	0.343738	NA
FBgn0004514	Oct-TyrR	1.34134	0.803668	2.44912	0.328145	0.742802	0.817484	1.96102	2.41167	0.81314	0.416138	NA
FBgn0004516	Gad1	7.99324	-1.21835	0.919227	-1.32541	0.185035	0.283221	0.0144099	0.890872	0.016175	0.987095	NA
FBgn0004552	Akh	0.677576	1.14146	3.51789	0.324473	0.74558	NA	-1.5547	3.73298	-0.416477	0.677061	NA
FBgn0004554	Edg91	1.33989	3.89594	2.74249	1.42059	0.155437	0.245734	1.49625	3.04292	0.491714	0.622922	NA
FBgn0004556	Dbp73D	244.415	0.372739	0.217362	1.71483	0.0863772	0.152289	-0.0483192	0.224383	-0.215342	0.8295	0.942488
FBgn0004567	slp2	0	NA	NA	NA	NA	NA	NA	NA	NA	NA	NA
FBgn0004569	aos	62.3108	1.02787	0.363589	2.82701	0.00469853	0.0120394	-0.145323	0.390973	-0.371697	0.710119	0.888557
FBgn0004573	5-HT7	16.6299	-0.198488	0.616794	-0.321806	0.747599	0.821245	0.000745074	0.637028	0.00116961	0.999067	NA
FBgn0004574	Rop	3306.08	0.551027	0.0939588	5.86456	4.50315e-09	2.8092e-08	0.214768	0.0950213	2.26021	0.0238081	0.108845
FBgn0004575	Syn	21.5177	-1.23356	0.605642	-2.03678	0.0416725	0.0828429	0.206048	0.582491	0.353736	0.723537	0.894445
FBgn0004577	Pxd	3.08129	0.634593	1.3961	0.454547	0.649435	0.741244	0.252387	1.47425	0.171197	0.864069	NA
FBgn0004580	Cbp53E	351.248	-0.915347	0.241594	-3.78878	0.000151391	0.000515363	-0.207856	0.241881	-0.859334	0.390156	0.671202
FBgn0004581	bgcn	6.53636	1.37201	1.00765	1.36159	0.173327	0.268664	-0.0713793	1.11646	-0.0639335	0.949023	NA
FBgn0004583	ex	792.574	0.627179	0.170613	3.67603	0.000236892	0.000777645	0.206703	0.173236	1.19319	0.232794	0.512282
FBgn0004584	Rrp1	203.077	1.41946	0.213795	6.63936	3.15053e-11	2.41116e-10	0.335872	0.226468	1.48308	0.138052	0.37262
FBgn0004587	B52	3321.21	0.191316	0.106301	1.79976	0.0718983	0.131095	-0.516855	0.107697	-4.79914	1.59347e-06	3.88601e-05
FBgn0004588	Eig71Ea	0	NA	NA	NA	NA	NA	NA	NA	NA	NA	NA
FBgn0004589	Eig71Eb	0	NA	NA	NA	NA	NA	NA	NA	NA	NA	NA
FBgn0004590	Eig71Ec	0	NA	NA	NA	NA	NA	NA	NA	NA	NA	NA
FBgn0004591	Eig71Ed	0	NA	NA	NA	NA	NA	NA	NA	NA	NA	NA
FBgn0004592	Eig71Ee	0	NA	NA	NA	NA	NA	NA	NA	NA	NA	NA
FBgn0004593	Eig71Ef	0	NA	NA	NA	NA	NA	NA	NA	NA	NA	NA
FBgn0004594	Eig71Eg	0	NA	NA	NA	NA	NA	NA	NA	NA	NA	NA
FBgn0004595	pros	153.677	-0.575156	0.252502	-2.27782	0.022737	0.0488943	0.252832	0.252127	1.00279	0.315961	0.605707
FBgn0004597	CycC	323.142	-0.00523693	0.166367	-0.0314782	0.974888	0.984183	0.0755503	0.170343	0.443519	0.657391	0.859101
FBgn0004598	Fur2	139.543	0.0652782	0.248727	0.262449	0.792975	0.855626	0.0471042	0.255744	0.184185	0.853868	0.951728
FBgn0004606	zfh1	14.1345	-1.53625	0.716187	-2.14504	0.0319496	0.0658573	-0.897713	0.720029	-1.24677	0.21248	NA
FBgn0004607	zfh2	171.937	-0.582751	0.238058	-2.44794	0.0143676	0.0327032	0.204082	0.237753	0.858381	0.390682	0.671483
FBgn0004611	Plc21C	326.081	-0.855651	0.177828	-4.81169	1.49659e-06	6.86412e-06	-0.20044	0.178367	-1.12375	0.26112	0.547252
FBgn0004618	gl	1.16819	2.23639	3.87595	0.576993	0.563944	NA	3.43732	3.85103	0.892571	0.372087	NA
FBgn0004619	GluRIA	1.88105	-2.79364	2.23989	-1.24723	0.212315	0.315407	0.24854	1.83221	0.13565	0.892098	NA
FBgn0004620	GluRIIA	18.6631	-1.92097	0.670525	-2.86488	0.00417173	0.0108365	-0.976232	0.661911	-1.47487	0.140248	NA
FBgn0004622	TkR99D	8.41349	-2.15077	0.921562	-2.33384	0.0196043	0.0428762	-0.782105	0.875965	-0.89285	0.371938	NA
FBgn0004623	Gbeta76C	2.45353	0	3.84622	0	1	1	5.03069	3.58852	1.40188	0.16095	NA
FBgn0004629	Cys	515.119	-0.312721	0.145257	-2.15288	0.0313281	0.0648133	-0.125353	0.147847	-0.847859	0.396516	0.676812
FBgn0004635	rho	47.5578	4.96729	0.70281	7.06776	1.57454e-12	1.34574e-11	2.74765	0.732675	3.75016	0.000176719	0.00214854
FBgn0004636	Rap1	2796.59	0.224533	0.103267	2.17428	0.0296839	0.061837	0.196855	0.104064	1.89168	0.0585334	0.209812
FBgn0004638	drk	1213.06	0.489248	0.110481	4.42834	9.49615e-06	3.89785e-05	0.416341	0.112031	3.71629	0.000202171	0.00242255
FBgn0004643	Zw10	482	0.168079	0.162578	1.03383	0.301213	0.414967	0.287968	0.164987	1.7454	0.0809154	0.263569
FBgn0004644	hh	438.338	0.761767	0.550397	1.38403	0.166349	0.259862	-0.220316	0.552809	-0.39854	0.690232	0.876064
FBgn0004646	ogre	15.8602	-0.656177	0.687567	-0.954345	0.339909	0.455065	-0.135821	0.694907	-0.195452	0.845039	NA
FBgn0004647	N	159.502	0.0604109	0.263135	0.229582	0.818417	0.874184	0.433981	0.265787	1.63281	0.102508	0.31055
FBgn0004648	svr	2618.32	-0.568515	0.0971521	-5.8518	4.86271e-09	3.02262e-08	0.170953	0.0974163	1.75487	0.0792821	0.260504
FBgn0004649	yl	37.4739	-2.36503	0.948882	-2.49244	0.0126868	0.0292618	-0.518434	0.93085	-0.556947	0.577564	0.810773
FBgn0004650	fs(1)N	4.77519	-2.39092	1.24862	-1.91485	0.0555116	0.105762	-1.37799	1.2206	-1.12894	0.258922	NA
FBgn0004652	fru	447.979	1.54325	0.341974	4.51276	6.39897e-06	2.68922e-05	-1.22613	0.353387	-3.46966	0.000521112	0.00528484
FBgn0004654	Pgd	3179.94	0.185916	0.158757	1.17107	0.241572	0.349479	-0.0229717	0.159367	-0.144143	0.885388	0.96454
FBgn0004655	wapl	533.732	0.462171	0.173752	2.65994	0.00781539	0.019063	0.0813079	0.177526	0.458007	0.646948	0.852482
FBgn0004656	fs(1)h	1652.63	0.556292	0.137028	4.05971	4.91335e-05	0.000181208	-0.00674816	0.138823	-0.0486098	0.96123	0.989375
FBgn0004657	mys	5017.87	1.1942	0.105007	11.3726	5.72702e-30	1.32859e-28	0.577635	0.10575	5.46229	4.70025e-08	1.65624e-06
FBgn0004666	sim	0.663203	1.21768	4.46271	0.272856	0.784964	NA	-1.49182	4.63419	-0.321917	0.747516	NA
FBgn0004687	Mlc-c	13076.7	-0.40444	0.111548	-3.62572	0.00028816	0.000931524	-0.100712	0.111647	-0.902058	0.367026	0.651641
FBgn0004698	Xpc	906.472	0.603186	0.119268	5.05739	4.25037e-07	2.11562e-06	0.187711	0.122564	1.53154	0.125636	0.351543
FBgn0004777	Ccp84Ag	2.62644	-2.92	1.69714	-1.72055	0.0853332	0.150781	-1.65747	1.59037	-1.04219	0.297323	NA
FBgn0004778	Ccp84Af	0	NA	NA	NA	NA	NA	NA	NA	NA	NA	NA
FBgn0004779	Ccp84Ae	0	NA	NA	NA	NA	NA	NA	NA	NA	NA	NA
FBgn0004780	Ccp84Ad	0	NA	NA	NA	NA	NA	NA	NA	NA	NA	NA
FBgn0004781	Ccp84Ac	0	NA	NA	NA	NA	NA	NA	NA	NA	NA	NA
FBgn0004782	Ccp84Ab	0	NA	NA	NA	NA	NA	NA	NA	NA	NA	NA
FBgn0004783	Ccp84Aa	0	NA	NA	NA	NA	NA	NA	NA	NA	NA	NA
FBgn0004784	inaC	3.65053	-2.23408	4.99496	-0.447267	0.654682	0.745493	4.09197	4.79431	0.853506	0.393379	NA
FBgn0004795	retn	10.7664	1.4718	0.835232	1.76215	0.0780444	0.140067	-0.328031	0.951023	-0.344924	0.730152	NA
FBgn0004797	mdy	205.644	-0.280722	0.213522	-1.31472	0.188602	0.28758	-0.413385	0.220645	-1.87353	0.0609951	0.216397
FBgn0004811	fs(2)ltoPP43	327.486	0.466404	0.172267	2.70745	0.00678022	0.0167898	0.262093	0.177406	1.47736	0.13958	0.374918
FBgn0004828	His3.3B	5448.25	-0.352251	0.0903177	-3.90013	9.61405e-05	0.000338708	0.154163	0.0904296	1.70479	0.0882336	0.279118
FBgn0004832	Xpac	98.4345	1.18843	0.295322	4.02418	5.7173e-05	0.000208199	0.0388246	0.316006	0.12286	0.902218	0.970614
FBgn0004837	Su(H)	56.688	0.182498	0.362541	0.503386	0.614693	0.71197	-0.200155	0.380642	-0.525836	0.599002	0.824856
FBgn0004838	Hrb27C	8981.25	-0.120794	0.0939029	-1.28637	0.198314	0.299618	-0.0291401	0.0941312	-0.309569	0.756889	0.909908
FBgn0004839	otk	93.2778	-0.231924	0.284424	-0.815416	0.414834	0.529782	-0.350147	0.295661	-1.18428	0.236301	0.517262
FBgn0004841	TkR86C	0.652375	2.64015	3.49352	0.755726	0.449814	NA	1.35829	3.7051	0.366599	0.713918	NA
FBgn0004842	RYa-R	0.702791	-0.804895	3.25745	-0.247094	0.804836	NA	0.940677	3.09468	0.303966	0.761154	NA
FBgn0004852	Ac76E	449.992	1.90743	0.199289	9.57117	1.05701e-21	1.58979e-20	-0.532335	0.214496	-2.4818	0.0130721	0.0679845
FBgn0004854	B-H2	0.301771	0.652035	4.99634	0.130503	0.896169	NA	1.34892	4.99357	0.270131	0.78706	NA
FBgn0004855	RpII15	292.012	0.658306	0.172082	3.82554	0.000130486	0.000449055	0.115117	0.179735	0.64048	0.521861	0.774548
FBgn0004856	Bx42	911.499	-0.217102	0.125597	-1.72855	0.0838895	0.148554	0.0230956	0.127145	0.181648	0.855859	0.951728
FBgn0004858	elB	650.455	1.28335	0.191679	6.69532	2.15196e-11	1.67656e-10	0.110035	0.196547	0.559842	0.575587	0.809697
FBgn0004859	ci	26.6873	-0.846248	0.506403	-1.6711	0.0947028	0.163669	-0.0826138	0.505011	-0.163588	0.870055	0.957441
FBgn0004860	ph-d	104.074	-0.0884914	0.263217	-0.336191	0.736727	0.81315	-0.209163	0.273715	-0.764165	0.444769	0.721478
FBgn0004861	ph-p	411.384	-0.0614504	0.170395	-0.360635	0.718373	0.797466	-0.161891	0.174419	-0.928176	0.353316	0.641804
FBgn0004862	bap	0	NA	NA	NA	NA	NA	NA	NA	NA	NA	NA
FBgn0004863	C15	0	NA	NA	NA	NA	NA	NA	NA	NA	NA	NA
FBgn0004864	hop	517.289	0.0395268	0.148452	0.266259	0.790039	0.853611	-0.137515	0.152426	-0.902177	0.366963	0.651641
FBgn0004865	Eip78C	70.0853	1.57179	0.368241	4.26838	1.96894e-05	7.7098e-05	1.19444	0.379394	3.14828	0.00164232	0.0131957
FBgn0004867	RpS2	29811.5	-1.09825	0.0915026	-12.0024	3.45298e-33	9.22541e-32	-0.541787	0.0915296	-5.91925	3.23412e-09	1.54569e-07
FBgn0004868	Gdi	8090.74	0.0681582	0.102275	0.666422	0.505141	0.61489	0.230467	0.102488	2.24872	0.0245305	0.111189
FBgn0004870	bab1	43.6789	-0.711398	0.398573	-1.78486	0.0742839	0.134536	-0.517478	0.410125	-1.26176	0.207036	0.478857
FBgn0004872	piwi	14.7305	0.214613	0.680053	0.315582	0.75232	0.825209	-0.599548	0.733492	-0.817389	0.413706	NA
FBgn0004875	enc	487.514	0.169083	0.183389	0.921989	0.356534	0.472094	-0.0220995	0.18675	-0.118337	0.905801	0.971387
FBgn0004876	cdi	6487.72	-0.472133	0.1583	-2.98252	0.00285886	0.00769347	-0.381946	0.158522	-2.40942	0.0159781	0.0799961
FBgn0004878	cas	0.184775	0	4.99745	0	1	NA	1.35386	4.99376	0.27111	0.786306	NA
FBgn0004880	scrt	0	NA	NA	NA	NA	NA	NA	NA	NA	NA	NA
FBgn0004882	orb	15.4487	-2.65221	0.991369	-2.6753	0.00746617	0.018288	-0.795995	0.970654	-0.82006	0.412182	NA
FBgn0004885	tok	9.56865	-1.40162	0.884963	-1.58382	0.113234	0.189569	0.495079	0.823148	0.601446	0.547543	NA
FBgn0004888	Scsalpha	3685.04	-0.295474	0.129705	-2.27804	0.0227241	0.0488765	-0.149157	0.130143	-1.1461	0.251754	0.535581
FBgn0004889	tws	970.07	0.05392	0.141063	0.38224	0.702283	0.78575	0.188023	0.142391	1.32047	0.186678	0.449454
FBgn0004892	sob	139.742	0.111018	0.227006	0.489054	0.624803	0.719829	-0.624624	0.243551	-2.56466	0.0103278	0.0563986
FBgn0004893	bowl	782.513	-0.396674	0.165458	-2.39743	0.0165106	0.0369578	-0.763691	0.168727	-4.52619	6.0057e-06	0.000121517
FBgn0004895	FoxL1	4.0778	-0.387155	1.27394	-0.303903	0.761202	0.832732	0.646813	1.25343	0.516035	0.60583	NA
FBgn0004896	fd59A	2.75805	1.72852	1.80968	0.955152	0.339501	0.454797	-1.63275	2.27821	-0.716682	0.47357	NA
FBgn0004897	fd96Ca	0	NA	NA	NA	NA	NA	NA	NA	NA	NA	NA
FBgn0004898	fd96Cb	0	NA	NA	NA	NA	NA	NA	NA	NA	NA	NA
FBgn0004901	Prat	437.841	0.33106	0.193774	1.70849	0.0875459	0.154032	-0.0727197	0.19812	-0.367049	0.713582	0.890433
FBgn0004903	Rb97D	574.15	0.454681	0.158839	2.86252	0.00420287	0.0109147	-0.0865948	0.163139	-0.530804	0.595555	0.821912
FBgn0004907	14-3-3zeta	26924.6	-0.333711	0.0802257	-4.15965	3.18737e-05	0.000120418	-0.142367	0.08031	-1.77272	0.0762747	0.252887
FBgn0004908	Arl2	193.872	0.714185	0.23054	3.09788	0.00194913	0.005428	0.170035	0.239338	0.710436	0.477434	0.746521
FBgn0004910	Eip63F-1	1539.56	0.0604749	0.120373	0.502398	0.615388	0.712378	0.043303	0.121431	0.356606	0.721387	0.893756
FBgn0004913	Gnf1	343.258	0.244862	0.16374	1.49543	0.134802	0.218769	0.227368	0.167941	1.35386	0.175782	0.435968
FBgn0004914	Hnf4	1636.21	0.00189204	0.133612	0.0141607	0.988702	0.993193	-0.126634	0.134944	-0.938419	0.348029	0.636385
FBgn0004915	TfIIB	531.841	0.458891	0.150502	3.04906	0.00229556	0.00630324	-0.00825589	0.155091	-0.0532324	0.957547	0.989301
FBgn0004919	gol	474.48	-0.745219	0.20229	-3.68391	0.000229679	0.000758277	0.211893	0.201324	1.0525	0.292571	0.580277
FBgn0004921	Ggamma1	3472.05	-0.915634	0.113151	-8.09211	5.86378e-16	6.47633e-15	-0.306838	0.1133	-2.7082	0.00676499	0.040357
FBgn0004924	Top1	2097.21	0.184244	0.106528	1.72953	0.0837142	0.148319	0.0733644	0.107675	0.68135	0.49565	0.758234
FBgn0004926	eIF2beta	5421.23	0.2579	0.0933769	2.76192	0.00574618	0.0144776	-0.0774077	0.0940682	-0.822889	0.410571	0.690178
FBgn0004956	upd1	2.39759	3.30154	2.12072	1.5568	0.119518	0.198206	-0.0507112	2.52939	-0.0200488	0.984004	NA
FBgn0004957	por	87.0936	0.393293	0.28957	1.3582	0.174401	0.270006	0.202747	0.298059	0.680226	0.496362	0.758234
FBgn0004959	phm	0	NA	NA	NA	NA	NA	NA	NA	NA	NA	NA
FBgn0005198	gig	1056.47	-0.148861	0.126938	-1.17271	0.240914	0.349013	0.153948	0.128026	1.20247	0.229182	0.508476
FBgn0005278	Sam-S	3454.86	-0.604051	0.149409	-4.04294	5.27861e-05	0.000193444	-0.139119	0.149587	-0.930024	0.352359	0.640624
FBgn0005322	nmd	1557.26	-0.324235	0.105587	-3.07078	0.00213498	0.00589502	-0.208615	0.106934	-1.95087	0.0510725	0.191196
FBgn0005355	Su(fu)	225.074	0.126043	0.196597	0.641126	0.521441	0.630112	-0.032139	0.203163	-0.158193	0.874305	0.959451
FBgn0005386	ash1	330.985	-0.216262	0.23246	-0.93032	0.352205	0.467612	0.0121211	0.234725	0.0516396	0.958816	0.989375
FBgn0005390	fs(1)M3	15.2016	-2.41137	0.852814	-2.82754	0.00469071	0.0120223	0.0961892	0.770733	0.124802	0.90068	NA
FBgn0005391	Yp2	1038.08	-2.11331	0.501557	-4.2135	2.51439e-05	9.68213e-05	0.147658	0.500003	0.295314	0.767754	0.915492
FBgn0005411	U2af50	1306.4	0.904053	0.134979	6.69775	2.11651e-11	1.65018e-10	0.0283917	0.137889	0.205902	0.836867	0.945312
FBgn0005427	ewg	541.01	-0.447277	0.163329	-2.73851	0.00617187	0.0154304	0.0232297	0.16442	0.141282	0.887647	0.965676
FBgn0005533	RpS17	21743.8	-1.32511	0.133564	-9.92114	3.36901e-23	5.49672e-22	-0.581833	0.133564	-4.35622	1.32328e-05	0.000238375
FBgn0005536	Mbs	1895.97	0.60726	0.134858	4.50297	6.70113e-06	2.80374e-05	0.0809659	0.136558	0.592903	0.553246	0.798179
FBgn0005558	ey	3.22129	2.04347	1.84902	1.10516	0.269089	0.380703	1.55422	1.90403	0.816282	0.414339	NA
FBgn0005561	sv	0.558469	-2.26505	3.77637	-0.599795	0.548643	NA	-2.71706	3.79009	-0.716886	0.473445	NA
FBgn0005564	Shal	55.9228	-0.176518	0.366988	-0.480991	0.630523	0.725374	0.149802	0.373298	0.401294	0.688203	0.874824
FBgn0005585	Calr	18161.5	-0.788524	0.0892576	-8.83425	1.00772e-18	1.28664e-17	-0.787285	0.089444	-8.80199	1.34408e-18	3.28745e-16
FBgn0005586	Rab3	132.466	-0.00108465	0.239789	-0.00452335	0.996391	0.998023	0.533799	0.241651	2.20897	0.0271766	0.120149
FBgn0005590	scw	0.11735	0.645466	4.99681	0.129176	0.897219	NA	0	4.99745	0	1	NA
FBgn0005593	RpL7	34924.1	-1.06513	0.0922156	-11.5505	7.34246e-31	1.75023e-29	-0.413104	0.0922236	-4.47937	7.4862e-06	0.000147176
FBgn0005596	yem	182.196	0.240679	0.204985	1.17413	0.240343	0.348282	0.0416895	0.212919	0.1958	0.844767	0.947704
FBgn0005612	Sox14	848.93	1.96625	0.153742	12.7893	1.88168e-37	6.13049e-36	0.938949	0.157768	5.95145	2.65784e-09	1.30016e-07
FBgn0005613	Sox15	0.116502	0.640197	4.99719	0.128111	0.898061	NA	0	4.99745	0	1	NA
FBgn0005614	trpl	20.3698	0.525415	0.989481	0.531001	0.595418	0.696021	2.5665	0.968373	2.65032	0.00804157	NA
FBgn0005616	msl-2	172.519	-0.646764	0.243959	-2.65112	0.00802253	0.0195174	-0.167868	0.246176	-0.681901	0.495302	0.75803
FBgn0005617	msl-1	476.042	0.280933	0.176213	1.59428	0.110874	0.186129	0.222724	0.178947	1.24464	0.213266	0.488303
FBgn0005619	Hdc	31.7026	5.14783	0.856357	6.01132	1.84021e-09	1.19683e-08	0.644916	1.01148	0.637598	0.523735	0.775669
FBgn0005624	Psc	397.797	1.88524	0.225703	8.35272	6.67105e-17	7.67798e-16	-0.00226729	0.236559	-0.00958444	0.992353	0.997943
FBgn0005626	ple	1171.83	-2.49397	0.971523	-2.56707	0.0102561	0.0241925	2.31353	0.96804	2.38991	0.0168525	0.0834198
FBgn0005631	robo1	222.176	0.952026	0.218952	4.34811	1.37316e-05	5.50378e-05	0.597947	0.225414	2.65266	0.00798597	0.046055
FBgn0005632	faf	3768.69	-0.366515	0.140859	-2.602	0.0092683	0.0221642	0.229497	0.140954	1.62817	0.103489	0.31193
FBgn0005633	fln	0.11735	0.645466	4.99681	0.129176	0.897219	NA	0	4.99745	0	1	NA
FBgn0005636	nvy	22.9764	-1.13116	0.592457	-1.90928	0.0562266	0.106948	-0.329655	0.587011	-0.561583	0.5744	0.809303
FBgn0005638	slbo	39.902	3.74422	0.578477	6.47255	9.63611e-11	7.04772e-10	1.2486	0.629836	1.98241	0.0474328	0.180694
FBgn0005640	Eip63E	1044.85	1.20187	0.131448	9.14334	6.05528e-20	8.31341e-19	0.114747	0.135753	0.845266	0.397962	0.678445
FBgn0005642	wdn	635.832	0.466534	0.184569	2.52769	0.0114815	0.026701	-0.0976189	0.188187	-0.518734	0.603946	0.82657
FBgn0005648	Pabp2	1057.25	0.120481	0.122977	0.979704	0.327232	0.44221	-0.531377	0.126912	-4.18697	2.82702e-05	0.000454729
FBgn0005649	Rox8	1540.67	0.170498	0.119219	1.43013	0.152681	0.242267	0.0642703	0.12067	0.532611	0.594303	0.820831
FBgn0005654	Orc3	81.7002	1.00394	0.298896	3.35883	0.00078273	0.00234706	0.58014	0.312586	1.85594	0.0634626	0.222682
FBgn0005655	PCNA	332.881	2.32332	0.187262	12.4068	2.40018e-35	6.9874e-34	0.266604	0.203579	1.30959	0.190336	0.455492
FBgn0005658	Ets65A	0.204461	0	4.99745	0	1	NA	1.4276	4.9887	0.286166	0.774751	NA
FBgn0005659	Ets98B	5.8836	-2.80618	1.17036	-2.39771	0.0164978	0.036937	-0.603691	1.01886	-0.592518	0.553504	NA
FBgn0005660	Ets21C	1510.95	5.09398	0.205385	24.802	8.52446e-136	2.16085e-133	1.17614	0.216539	5.43155	5.58679e-08	1.93582e-06
FBgn0005664	Crys	1181.17	3.4889	0.234643	14.8689	5.24308e-50	2.52275e-48	0.583222	0.240702	2.42301	0.0153926	0.0775787
FBgn0005666	bt	425.654	-0.984723	0.222284	-4.43003	9.42196e-06	3.87045e-05	0.193026	0.220665	0.874748	0.381711	0.663562
FBgn0005670	Cyp4d1	803.573	-5.1819	0.199325	-25.9972	5.32179e-149	1.72842e-146	-0.103987	0.138236	-0.752247	0.451902	0.726328
FBgn0005671	Vha55	31187	-0.738477	0.131876	-5.59977	2.14638e-08	1.23313e-07	0.32079	0.131849	2.43301	0.0149739	0.0762541
FBgn0005672	spi	610.224	-0.6728	0.135637	-4.96028	7.03917e-07	3.37134e-06	-0.153035	0.136648	-1.11992	0.262746	0.548673
FBgn0005674	GluProRS	2420.81	-0.1862	0.115756	-1.60855	0.107715	0.181822	-0.224749	0.116734	-1.92531	0.05419	0.198609
FBgn0005677	dac	37.8815	-0.0927439	0.49739	-0.186461	0.852083	0.897025	0.372013	0.501831	0.741312	0.458505	0.731988
FBgn0005683	pie	57.2614	1.07588	0.435968	2.46778	0.0135952	0.0311017	0.375079	0.453163	0.827691	0.407845	0.687424
FBgn0005694	Aef1	840.427	-0.242105	0.155794	-1.55401	0.120183	0.199085	-0.233209	0.157769	-1.47817	0.139363	0.3747
FBgn0005695	gcl	358.019	-0.682531	0.210442	-3.24333	0.00118143	0.00342882	-0.0809277	0.211108	-0.383346	0.701463	0.88304
FBgn0005696	DNApol-alpha73	65.2595	0.98873	0.339307	2.91397	0.00356869	0.0094399	-0.119652	0.366178	-0.326759	0.743851	0.90569
FBgn0005771	noc	665.188	0.0871914	0.155318	0.561373	0.574543	0.677778	-0.303738	0.159005	-1.91024	0.0561019	0.203021
FBgn0005775	Con	1.37309	1.52945	2.40061	0.637109	0.524054	0.632357	1.5311	2.456	0.623414	0.533012	NA
FBgn0005777	PpD3	1823.63	0.488178	0.105506	4.62702	3.70966e-06	1.60979e-05	-0.0182845	0.10759	-0.169947	0.865052	0.955621
FBgn0005778	PpD5	0	NA	NA	NA	NA	NA	NA	NA	NA	NA	NA
FBgn0005779	PpD6	0	NA	NA	NA	NA	NA	NA	NA	NA	NA	NA
FBgn0008635	betaCOP	3288.7	-0.79332	0.1061	-7.47712	7.59707e-14	7.13891e-13	-0.426962	0.106509	-4.00868	6.10595e-05	0.000866503
FBgn0008636	hbn	14.8266	-2.34641	0.757106	-3.09918	0.00194057	0.00540706	-0.194755	0.681522	-0.285765	0.775058	NA
FBgn0008646	E5	14.5591	-1.3479	0.748129	-1.8017	0.0715934	0.130645	-0.0946637	0.728072	-0.13002	0.896551	NA
FBgn0008651	lbl	0.327518	-0.800724	4.99025	-0.160458	0.872521	NA	-1.53152	4.99215	-0.306786	0.759007	NA
FBgn0010014	CanB	30.1185	-1.01198	0.57669	-1.75481	0.0792915	0.14198	0.268304	0.56328	0.476324	0.633843	0.843303
FBgn0010015	CanA1	8.76733	0.480747	0.978431	0.491345	0.623183	0.718839	0.794225	0.988385	0.803557	0.421653	NA
FBgn0010019	Cyp4g1	2351.57	-2.69389	0.413858	-6.5092	7.55528e-11	5.59274e-10	-1.88101	0.413804	-4.54565	5.47649e-06	0.000114142
FBgn0010038	GstD2	139.996	6.0896	0.604484	10.074	7.19627e-24	1.23214e-22	2.7679	0.629147	4.39945	1.08525e-05	0.00020145
FBgn0010039	GstD3	46.3242	1.25542	0.470447	2.66857	0.00761748	0.0186323	0.746596	0.486443	1.53481	0.124831	0.350303
FBgn0010040	GstD4	48.3774	4.33643	0.59206	7.32432	2.40109e-13	2.16995e-12	1.03812	0.662762	1.56636	0.117265	0.337548
FBgn0010041	GstD5	2430.17	6.38125	0.2461	25.9295	3.09652e-148	9.75215e-146	2.11539	0.252718	8.37055	5.73487e-17	1.08389e-14
FBgn0010042	GstD6	100.708	6.86548	0.798239	8.60078	7.91748e-18	9.60168e-17	1.97433	0.870764	2.26735	0.0233686	0.107248
FBgn0010043	GstD7	331.633	0.252893	0.233496	1.08307	0.278776	0.391371	0.179901	0.236847	0.759565	0.447515	0.72373
FBgn0010044	GstD8	142.019	1.60515	0.399783	4.01506	5.94306e-05	0.000215815	-0.824874	0.424879	-1.94143	0.0522056	0.193808
FBgn0010051	Itp-r83A	1443.16	-0.251124	0.147467	-1.70292	0.0885839	0.155358	0.458901	0.147512	3.11095	0.00186488	0.0146999
FBgn0010052	Jhe	3.20871	5.33365	2.08825	2.55413	0.0106454	0.0249972	1.37267	2.51438	0.545927	0.585116	NA
FBgn0010053	Jheh1	3813.88	-2.28391	0.158203	-14.4366	3.04539e-47	1.39431e-45	-0.352827	0.157124	-2.24553	0.0247339	0.111839
FBgn0010078	RpL23	28219.9	-1.26574	0.132487	-9.55369	1.25152e-21	1.86883e-20	-0.458447	0.132479	-3.46052	0.00053913	0.00539752
FBgn0010097	gammaTub37C	10.0711	1.04447	0.841302	1.24149	0.214424	0.317994	0.0441733	0.906865	0.0487099	0.96115	NA
FBgn0010100	Acon	14776.4	-1.02736	0.160369	-6.40618	1.4921e-10	1.07021e-09	-0.255964	0.160365	-1.59614	0.110458	0.325486
FBgn0010105	comm	17.1966	-1.33914	0.747219	-1.79216	0.0731071	0.132879	-0.683474	0.747446	-0.914412	0.3605	NA
FBgn0010109	dpn	1.16949	3.96392	3.33549	1.18841	0.234673	NA	0	3.60536	0	1	NA
FBgn0010113	hdc	560.561	1.08601	0.279902	3.87997	0.00010447	0.000365453	0.201987	0.282449	0.715127	0.47453	0.744183
FBgn0010114	hig	1.29378	1.76096	2.43871	0.722087	0.470241	0.583224	0.95332	2.57827	0.369752	0.711567	NA
FBgn0010173	RpA-70	1699.64	2.58639	0.136226	18.9861	2.22374e-80	2.13994e-78	0.686974	0.140093	4.9037	9.40479e-07	2.45173e-05
FBgn0010194	Wnt5	44.1832	1.10052	0.404973	2.71752	0.00657722	0.016326	0.315048	0.430507	0.731808	0.464286	0.736533
FBgn0010197	Gyc32E	1.48385	0.784997	2.08605	0.376309	0.706687	0.789148	-0.0532245	2.24619	-0.0236955	0.981096	NA
FBgn0010198	RpS15Aa	33001.6	-1.22868	0.110376	-11.1317	8.79191e-29	1.89967e-27	-0.498181	0.11038	-4.51331	6.38225e-06	0.000127891
FBgn0010213	Sod2	1757.26	-0.292912	0.142882	-2.05002	0.0403626	0.0806864	-0.207585	0.143801	-1.44356	0.148862	0.39081
FBgn0010215	alpha-Cat	1877.05	0.186867	0.103096	1.81256	0.0699001	0.128193	0.186318	0.104268	1.78692	0.0739499	0.246678
FBgn0010217	ATPsynbeta	36245.1	-0.745816	0.121107	-6.15832	7.35211e-10	4.96172e-09	-0.146138	0.12112	-1.20655	0.227604	0.50649
FBgn0010220	Dbp45A	482.755	0.1207	0.167282	0.721536	0.47058	0.58355	0.196952	0.169898	1.15924	0.246359	0.53007
FBgn0010222	Nmdmc	194.551	1.86929	0.230035	8.12612	4.43245e-16	4.92689e-15	-0.28567	0.254608	-1.122	0.261863	0.547827
FBgn0010223	Galphaf	1123.48	-0.25832	0.183981	-1.40406	0.160301	0.252158	0.274775	0.184335	1.49063	0.136059	0.369156
FBgn0010225	Gel	1000.17	-0.0744201	0.135591	-0.548856	0.583104	0.684923	-0.0885298	0.137442	-0.644126	0.519494	0.773244
FBgn0010226	GstS1	2180.41	1.13053	0.160912	7.02581	2.12831e-12	1.80567e-11	0.314509	0.16225	1.93842	0.0525718	0.194738
FBgn0010228	HmgZ	2266.34	-0.374051	0.177055	-2.11262	0.0346334	0.0706468	0.00714552	0.177402	0.0402786	0.967871	0.990989
FBgn0010235	Klc	2350.24	0.555014	0.118143	4.69782	2.6295e-06	1.16291e-05	0.231092	0.11932	1.93674	0.0527767	0.195323
FBgn0010238	Lac	35.2658	-1.1428	0.484429	-2.35907	0.018321	0.0403667	-0.419754	0.484609	-0.866171	0.386396	0.667762
FBgn0010240	Lcch3	14.686	-0.688762	0.667745	-1.03147	0.302319	0.416103	0.00844856	0.669497	0.0126193	0.989932	NA
FBgn0010241	Mdr50	6473.06	0.172436	0.135515	1.27245	0.203215	0.304808	-1.21687	0.136572	-8.91011	5.09836e-19	1.36768e-16
FBgn0010246	Myo61F	35525.7	-0.617957	0.10842	-5.69966	1.20049e-08	7.09708e-08	0.273641	0.108406	2.52422	0.0115955	0.0620117
FBgn0010247	Parp	1340.38	0.0930556	0.152251	0.6112	0.541067	0.647623	0.170648	0.153211	1.1138	0.265363	0.551382
FBgn0010258	Rbp4	6.1929	0.195142	1.17469	0.166122	0.868061	0.908993	1.98461	1.12791	1.75954	0.0784856	NA
FBgn0010263	Rbp9	142.38	-0.734113	0.280244	-2.61955	0.00880455	0.0211574	-0.0217308	0.280277	-0.0775336	0.938199	0.983247
FBgn0010265	RpS13	18546.9	-0.905854	0.0929931	-9.74108	2.01401e-22	3.14761e-21	-0.253356	0.0930121	-2.7239	0.00645162	0.0392478
FBgn0010269	Dsor1	560.797	0.173698	0.161923	1.07272	0.283396	0.396144	0.222791	0.164235	1.35654	0.174928	0.434774
FBgn0010278	Ssrp	1662.08	3.09505	0.135696	22.8088	3.75338e-115	6.84367e-113	0.378407	0.142352	2.65825	0.00785483	0.0454564
FBgn0010280	Taf4	1132.07	-0.0866632	0.132444	-0.654337	0.512895	0.621852	-0.159086	0.134195	-1.18548	0.235827	0.516496
FBgn0010282	TfIIFalpha	657.915	0.105633	0.137256	0.769607	0.441533	0.555686	-0.0607226	0.140541	-0.432065	0.665694	0.863643
FBgn0010287	Trf	130.077	0.620186	0.241983	2.56293	0.0103793	0.0244354	-0.0930233	0.256585	-0.362544	0.716946	0.891964
FBgn0010288	Uch	973.474	0.489779	0.125883	3.89074	9.99384e-05	0.00035078	0.254744	0.12828	1.98584	0.0470512	0.179485
FBgn0010292	bys	645.145	-0.0122585	0.165762	-0.0739528	0.941048	0.961658	-0.0299824	0.168127	-0.178332	0.858463	0.952625
FBgn0010294	ng2	0	NA	NA	NA	NA	NA	NA	NA	NA	NA	NA
FBgn0010295	ng3	0	NA	NA	NA	NA	NA	NA	NA	NA	NA	NA
FBgn0010296	ng4	0	NA	NA	NA	NA	NA	NA	NA	NA	NA	NA
FBgn0010300	brat	425.311	1.40933	0.182472	7.72354	1.13141e-14	1.14385e-13	0.537937	0.187975	2.86175	0.00421307	0.0280287
FBgn0010303	hep	1213.18	0.0613814	0.119631	0.513089	0.607889	0.705899	0.176357	0.12102	1.45726	0.145044	0.385733
FBgn0010309	pigeon	192.746	0.560607	0.211361	2.65237	0.00799283	0.0194633	0.408191	0.217763	1.87448	0.0608646	0.216027
FBgn0010313	corto	441.391	-0.191977	0.217552	-0.882442	0.377538	0.492778	0.0416995	0.219659	0.189837	0.849437	0.949251
FBgn0010314	Cks30A	17.8959	1.326	0.65507	2.02422	0.0429479	0.0848817	0.661244	0.688529	0.960372	0.336868	NA
FBgn0010315	CycD	341.66	0.114059	0.163716	0.696687	0.485999	0.597679	-0.277246	0.17049	-1.62617	0.103914	0.312983
FBgn0010316	dap	172.419	-0.577832	0.241737	-2.39034	0.0168329	0.0375578	-0.138316	0.244124	-0.566581	0.570999	0.807957
FBgn0010317	CycJ	4.04713	-3.41928	1.50073	-2.27841	0.0227022	0.0488396	-0.870093	1.22894	-0.708	0.478945	NA
FBgn0010323	Gsc	1.96637	-1.7936	1.92117	-0.933593	0.350514	0.465902	-1.66183	2.01016	-0.826717	0.408398	NA
FBgn0010328	woc	1437.51	0.200033	0.123993	1.61325	0.106689	0.180436	0.101185	0.125512	0.806177	0.420141	0.700178
FBgn0010329	Tbh	5.63621	-0.968182	1.20853	-0.801121	0.423061	0.537844	-0.0870688	1.19983	-0.0725675	0.94215	NA
FBgn0010333	Rac1	1742.74	-0.213744	0.115396	-1.85226	0.063988	0.119159	0.0247971	0.116191	0.213417	0.831002	0.942913
FBgn0010339	128up	1183.7	-0.408818	0.124442	-3.28521	0.00101907	0.00299693	-0.402427	0.126265	-3.18717	0.00143673	0.0119598
FBgn0010340	140up	303.845	-0.449315	0.178777	-2.51326	0.0119619	0.0277377	-0.0446584	0.181004	-0.246726	0.805121	0.931591
FBgn0010341	Cdc42	5994.84	0.703153	0.108608	6.47424	9.52924e-11	6.97447e-10	0.521633	0.109006	4.78534	1.707e-06	4.0909e-05
FBgn0010342	Map60	155.18	0.941366	0.232154	4.05493	5.01501e-05	0.000184647	-0.120541	0.248282	-0.485502	0.627321	0.839972
FBgn0010348	Arf79F	12805.4	-0.460611	0.0877671	-5.24811	1.53668e-07	8.06602e-07	-0.0897358	0.0878808	-1.02111	0.307203	0.59561
FBgn0010350	CdsA	920.362	-0.996043	0.166696	-5.97521	2.29796e-09	1.47515e-08	-0.043497	0.166118	-0.261844	0.793442	0.926723
FBgn0010352	Nc73EF	8154.62	-0.0618676	0.181726	-0.340444	0.733522	0.810579	-0.290342	0.18195	-1.59573	0.11055	0.325543
FBgn0010355	Taf1	1437.81	-0.189337	0.132349	-1.4306	0.152546	0.242121	-0.00561509	0.133324	-0.0421163	0.966406	0.99058
FBgn0010356	Taf5	304.034	0.28855	0.170783	1.68957	0.0911105	0.159145	-0.00273969	0.1771	-0.0154697	0.987657	0.997092
FBgn0010357	betaTry	78115.1	-1.72685	0.123178	-14.0191	1.19098e-44	5.13604e-43	0.752821	0.123091	6.11599	9.59601e-10	5.32003e-08
FBgn0010358	deltaTry	21266.6	-1.2569	0.243384	-5.16426	2.41387e-07	1.23401e-06	1.7888	0.243166	7.3563	1.89076e-13	2.04202e-11
FBgn0010359	gammaTry	29174.5	-0.864601	0.175264	-4.93314	8.09196e-07	3.83142e-06	2.64124	0.174977	15.0948	1.75233e-51	2.91447e-48
FBgn0010379	Akt1	1746.58	0.793336	0.126494	6.27173	3.57052e-10	2.48549e-09	0.22046	0.12815	1.72033	0.0853725	0.273166
FBgn0010380	AP-1-2beta	1647.27	0.0994688	0.119809	0.830227	0.40641	0.521267	0.199618	0.120836	1.65198	0.0985393	0.30227
FBgn0010382	CycE	77.2869	1.70123	0.343896	4.94693	7.53934e-07	3.58939e-06	-0.147574	0.377897	-0.390515	0.696156	0.879601
FBgn0010383	Cyp18a1	13.3061	-1.63161	0.777684	-2.09804	0.0359015	0.0728814	-0.630011	0.765369	-0.823147	0.410425	NA
FBgn0010385	Def	0.407664	-3.24422	4.89225	-0.663134	0.507245	NA	-2.51102	4.89225	-0.513264	0.607766	NA
FBgn0010387	Dbi	6405.53	-0.959313	0.186383	-5.14701	2.64672e-07	1.34445e-06	-0.036103	0.186324	-0.193765	0.84636	0.948434
FBgn0010388	Dro	2.27429	1.03368	2.02166	0.511305	0.609138	0.707111	-1.69955	2.42753	-0.700114	0.483856	NA
FBgn0010389	htl	84.9168	-0.964562	0.353605	-2.7278	0.00637588	0.0158793	-0.275295	0.354236	-0.777153	0.437068	0.714204
FBgn0010391	Gtp-bp	2596.75	-1.13442	0.116826	-9.71038	2.72332e-22	4.2244e-21	-0.806589	0.117407	-6.87002	6.41945e-12	5.66566e-10
FBgn0010395	Itgbn	1917.07	-0.249296	0.104879	-2.37698	0.0174549	0.0387512	0.305472	0.105163	2.90475	0.00367547	0.0252704
FBgn0010397	LamC	1647.16	0.843573	0.129437	6.51726	7.1605e-11	5.31565e-10	0.430224	0.131028	3.28346	0.00102543	0.00920893
FBgn0010398	Lrr47	57.7605	-0.240299	0.340164	-0.706422	0.479926	0.592199	-0.466808	0.358231	-1.30309	0.192543	0.458661
FBgn0010399	Nmdar1	1.64561	-0.365736	1.83326	-0.199501	0.841871	0.890269	-0.0672782	1.88183	-0.0357514	0.971481	NA
FBgn0010401	Os-C	0.233004	1.63695	4.89259	0.334578	0.737944	NA	0	4.99745	0	1	NA
FBgn0010403	Obp83b	79.3739	0.26508	0.367118	0.722056	0.47026	0.583224	0.285838	0.374841	0.762558	0.445727	0.721951
FBgn0010406	RNaseX25	865.795	-0.58056	0.151195	-3.8398	0.000123133	0.000425581	0.239066	0.150946	1.58378	0.113243	0.330085
FBgn0010407	Ror	25.1668	2.47035	0.675986	3.65443	0.000257749	0.000840008	0.664462	0.724549	0.91707	0.359106	0.646386
FBgn0010408	RpS9	34839.3	-1.28972	0.100502	-12.8327	1.07513e-37	3.52487e-36	-0.611636	0.100511	-6.08525	1.16308e-09	6.1606e-08
FBgn0010409	RpL18A	20096	-0.996321	0.0915229	-10.886	1.34372e-27	2.72228e-26	-0.290497	0.0915295	-3.1738	0.00150456	0.012425
FBgn0010411	RpS18	27016.2	-1.1373	0.108362	-10.4954	9.06752e-26	1.71032e-24	-0.416222	0.108362	-3.84102	0.000122525	0.00156757
FBgn0010412	RpS19a	18129.9	-1.20004	0.108098	-11.1014	1.23472e-28	2.64586e-27	-0.492933	0.108108	-4.55963	5.12443e-06	0.000108159
FBgn0010414	SerT	0.351126	2.228	4.85659	0.458759	0.646407	NA	0	4.99745	0	1	NA
FBgn0010415	Sdc	1653.7	0.130922	0.124126	1.05475	0.291538	0.404597	0.246126	0.125274	1.96471	0.0494482	0.186321
FBgn0010416	TH1	571.644	-0.266583	0.147116	-1.81206	0.0699767	0.128289	-0.0899005	0.149236	-0.602405	0.546905	0.794281
FBgn0010417	Taf6	355.076	0.225132	0.169831	1.32562	0.184965	0.283156	0.103449	0.174338	0.593383	0.552925	0.798008
FBgn0010421	TfIIFbeta	194.142	-0.0059325	0.202972	-0.0292282	0.976683	0.98538	0.0263232	0.208752	0.126098	0.899654	0.970072
FBgn0010422	TfIIS	675.96	-0.356266	0.135732	-2.62477	0.00867073	0.0208647	-0.328768	0.138519	-2.37344	0.017623	0.0863768
FBgn0010423	TpnC47D	184.976	-1.42452	0.223159	-6.38346	1.73131e-10	1.23667e-09	0.223299	0.213483	1.04598	0.295571	0.583286
FBgn0010424	TpnC73F	164.327	-0.566794	0.211808	-2.67598	0.00745104	0.0182638	-0.127855	0.214565	-0.595882	0.551254	0.79698
FBgn0010425	epsilonTry	71731.8	-2.32818	0.129129	-18.0298	1.13617e-72	9.22517e-71	0.862201	0.128967	6.68546	2.30204e-11	1.84074e-09
FBgn0010431	mtrm	9.12869	-0.688598	0.908867	-0.757645	0.448664	0.562684	0.079874	0.906377	0.0881245	0.929778	NA
FBgn0010433	ato	0	NA	NA	NA	NA	NA	NA	NA	NA	NA	NA
FBgn0010434	cora	5165.99	0.868691	0.118526	7.32909	2.3172e-13	2.09779e-12	0.682313	0.118959	5.73571	9.71045e-09	4.07839e-07
FBgn0010435	emp	587.635	-0.552689	0.131858	-4.19155	2.77055e-05	0.000105862	-0.374148	0.134528	-2.78119	0.00541595	0.0344598
FBgn0010438	mtSSB	389.58	0.345224	0.162378	2.12605	0.0334987	0.0685204	-0.738508	0.172959	-4.26984	1.95612e-05	0.000330632
FBgn0010441	pll	278.625	0.351704	0.178817	1.96684	0.049202	0.0952957	0.0746201	0.185302	0.402694	0.687173	0.874368
FBgn0010452	trn	68.2597	0.0475383	0.345602	0.137552	0.890594	0.927372	0.571093	0.348268	1.63981	0.101045	0.307236
FBgn0010453	Wnt4	13.0184	0.584133	0.691141	0.845173	0.398014	0.513221	-0.6525	0.765376	-0.852522	0.393924	NA
FBgn0010470	Fkbp14	3393.27	-1.3591	0.111821	-12.1543	5.44187e-34	1.51223e-32	-0.0963453	0.111222	-0.866242	0.386357	0.667762
FBgn0010473	tutl	15.4277	-0.588855	0.663489	-0.887513	0.374803	0.4902	0.494956	0.6534	0.757508	0.448746	NA
FBgn0010482	l(2)01289	142.65	-1.21601	0.243797	-4.98782	6.1064e-07	2.96007e-06	-0.374925	0.241799	-1.55056	0.121007	0.344149
FBgn0010488	NAT1	5582.37	-0.031745	0.126112	-0.251721	0.801257	0.862146	0.306803	0.126292	2.42932	0.0151271	0.0766184
FBgn0010497	dmGlut	15232.9	-4.00209	0.206082	-19.4199	5.24199e-84	5.34118e-82	-1.00265	0.205312	-4.88353	1.04205e-06	2.6746e-05
FBgn0010501	Dcp-1	1378.93	0.870556	0.122478	7.10785	1.17863e-12	1.01487e-11	0.0335506	0.125451	0.26744	0.78913	0.924825
FBgn0010504	kermit	4037.57	-0.203985	0.0899615	-2.26747	0.0233616	0.0500761	-0.109378	0.0905362	-1.20811	0.227003	0.505424
FBgn0010516	wal	5030.64	-0.746584	0.120317	-6.20515	5.4645e-10	3.74127e-09	-0.3825	0.120553	-3.17287	0.00150942	0.0124527
FBgn0010520	Bka	267.299	-0.306002	0.217473	-1.40708	0.159403	0.251012	-0.460852	0.223027	-2.06635	0.0387958	0.155407
FBgn0010531	Ccs	429.461	-0.320686	0.200938	-1.59594	0.110501	0.185681	-0.218617	0.203516	-1.0742	0.282732	0.570265
FBgn0010548	Aldh-III	2258.88	-1.08822	0.13773	-7.90113	2.76388e-15	2.88115e-14	-0.329917	0.137741	-2.3952	0.0166115	0.0825216
FBgn0010549	l(2)03659	339.958	1.28093	0.221404	5.7855	7.22985e-09	4.39671e-08	-0.512858	0.23414	-2.19039	0.0284958	0.124264
FBgn0010551	Phb2	4637.86	0.394114	0.0924651	4.2623	2.02336e-05	7.90557e-05	-0.175676	0.0934593	-1.8797	0.0601488	0.214468
FBgn0010583	dock	697.05	1.09469	0.163511	6.69488	2.15844e-11	1.68035e-10	0.335664	0.167442	2.00465	0.0450002	0.173733
FBgn0010590	Prosbeta1	1738.75	-0.217679	0.119406	-1.82301	0.0683015	0.12575	-0.0357401	0.120318	-0.297047	0.76643	0.91485
FBgn0010591	Sply	3925.49	-0.606914	0.135075	-4.49316	7.01742e-06	2.92665e-05	0.135578	0.135075	1.00372	0.315513	0.60526
FBgn0010602	lwr	1200.33	-0.357667	0.11238	-3.18267	0.00145925	0.00415847	-0.156774	0.113794	-1.3777	0.168296	0.424751
FBgn0010607	l(2)05714	293.408	0.827913	0.258404	3.20395	0.00135557	0.00389182	0.0323183	0.26483	0.122034	0.902872	0.970823
FBgn0010611	Hmgs	2181.45	-0.0519831	0.139342	-0.373061	0.709103	0.790721	-0.130881	0.140262	-0.933116	0.35076	0.638555
FBgn0010612	ATPsynG	2445.43	-0.761737	0.154538	-4.92913	8.25964e-07	3.90904e-06	-0.0615078	0.154587	-0.397885	0.690715	0.876409
FBgn0010620	CG10939	582.094	-0.444469	0.167662	-2.65098	0.00802597	0.0195212	-0.365779	0.170104	-2.15033	0.031529	0.133501
FBgn0010621	CCT5	6706.37	0.522779	0.104725	4.99191	5.97858e-07	2.90217e-06	-0.277126	0.10547	-2.62753	0.00860072	0.0489904
FBgn0010622	DCTN3-p24	427.866	-0.0874638	0.156149	-0.56013	0.575391	0.678467	0.162316	0.158422	1.02458	0.305562	0.593705
FBgn0010638	Sec61beta	4226.02	-1.02624	0.184286	-5.56876	2.56565e-08	1.46108e-07	-0.933788	0.18464	-5.05734	4.25154e-07	1.1985e-05
FBgn0010651	MFS14	2944.33	1.15203	0.24732	4.65806	3.19197e-06	1.39868e-05	0.473854	0.247893	1.91153	0.0559369	0.202598
FBgn0010660	Nup214	615.025	1.02167	0.135213	7.55601	4.15624e-14	3.98853e-13	0.474114	0.139747	3.39266	0.000692177	0.00660866
FBgn0010741	Pfdn2	1827.26	0.558837	0.113788	4.9112	9.05222e-07	4.26279e-06	-0.241497	0.116281	-2.07683	0.0378169	0.152482
FBgn0010747	Srp54k	2001.06	-0.745026	0.127733	-5.83267	5.45483e-09	3.35853e-08	-0.255287	0.128104	-1.99282	0.0462817	0.177118
FBgn0010750	atms	420.395	0.369152	0.162894	2.26621	0.0234383	0.0502049	-0.228355	0.169381	-1.34817	0.177602	0.43844
FBgn0010762	simj	624.382	1.67443	0.140469	11.9203	9.2752e-33	2.39794e-31	0.0620664	0.14929	0.415744	0.677597	0.87012
FBgn0010768	sqz	84.885	1.0485	0.354445	2.95816	0.00309483	0.00827491	-0.0091433	0.373468	-0.0244821	0.980468	0.995661
FBgn0010770	ppan	379.214	0.443118	0.169557	2.61339	0.00896502	0.0215032	-0.0443596	0.175689	-0.25249	0.800663	0.929843
FBgn0010772	Xe7	1426.33	-0.433433	0.123193	-3.51832	0.000434293	0.00136363	-0.108849	0.124008	-0.877763	0.380072	0.66156
FBgn0010774	Ref1	1913.39	0.626684	0.111172	5.63708	1.72956e-08	1.00309e-07	0.163869	0.112904	1.4514	0.146668	0.387696
FBgn0010786	l(3)02640	911.01	0.961089	0.158614	6.05928	1.36736e-09	8.97155e-09	-0.174587	0.162957	-1.07137	0.284002	0.571855
FBgn0010803	TrpRS	1224.83	-0.0956311	0.118131	-0.809532	0.418209	0.532875	-0.331341	0.120477	-2.75024	0.00595516	0.0368476
FBgn0010808	Chchd3	1380.91	-0.698008	0.135558	-5.14916	2.61662e-07	1.33111e-06	-0.222301	0.136074	-1.63367	0.102327	0.310227
FBgn0010812	unc-45	1035.12	0.615329	0.130769	4.70545	2.53306e-06	1.12265e-05	0.168558	0.133474	1.26285	0.206642	0.47854
FBgn0010825	Gug	1464.51	-0.222375	0.154076	-1.44328	0.14894	0.237523	-0.150019	0.155081	-0.967355	0.333367	0.622527
FBgn0010830	l(3)04053	310.723	0.148821	0.182894	0.813698	0.415818	0.530648	-0.156592	0.188928	-0.828846	0.407191	0.686857
FBgn0010877	l(3)05822	703.326	0.834322	0.142483	5.85561	4.7527e-09	2.95777e-08	0.318602	0.146202	2.17918	0.0293181	0.126723
FBgn0010894	sinu	89.156	-0.559138	0.334307	-1.67253	0.0944195	0.16341	-0.147597	0.337986	-0.436696	0.662332	0.861901
FBgn0010905	Spn	2324.03	-0.263051	0.149179	-1.76332	0.0778466	0.139826	-0.110334	0.149732	-0.736878	0.461197	0.734844
FBgn0010909	msn	4426.27	0.958954	0.10787	8.88988	6.11751e-19	7.91772e-18	0.644716	0.10848	5.94318	2.79552e-09	1.35951e-07
FBgn0010926	l(3)07882	532.285	0.654421	0.15781	4.14689	3.37024e-05	0.000127001	-0.00928493	0.162904	-0.0569963	0.954548	0.988669
FBgn0011016	SsRbeta	3827.34	-1.20035	0.150341	-7.98422	1.41415e-15	1.51051e-14	-0.561249	0.150419	-3.73125	0.000190533	0.00229967
FBgn0011020	Sas-4	59.1359	0.15291	0.386561	0.395564	0.692427	0.777568	0.687679	0.389276	1.76656	0.0773022	0.255706
FBgn0011202	dia	3057.63	0.829538	0.152005	5.45733	4.8336e-08	2.66502e-07	0.747974	0.152484	4.90527	9.32993e-07	2.43987e-05
FBgn0011204	cue	2056.76	-0.60543	0.120016	-5.04456	4.54567e-07	2.25612e-06	-0.116045	0.120372	-0.96405	0.335021	0.623972
FBgn0011205	fbl	4183.62	-0.563341	0.128638	-4.37929	1.19065e-05	4.81683e-05	0.0157695	0.128733	0.122498	0.902505	0.970671
FBgn0011206	bol	261.549	-0.354221	0.191686	-1.84793	0.0646126	0.120107	-0.454006	0.197976	-2.29324	0.0218342	0.101665
FBgn0011207	pelo	644.667	0.15976	0.150453	1.06186	0.288298	0.40143	-0.00656948	0.153435	-0.0428161	0.965848	0.990524
FBgn0011211	blw	25222.3	-0.712624	0.142197	-5.01151	5.40037e-07	2.63998e-06	-0.028368	0.142203	-0.199489	0.84188	0.947182
FBgn0011217	eff	9821.67	-0.332517	0.116525	-2.85361	0.00432252	0.0112002	-0.187327	0.116702	-1.60517	0.108457	0.321428
FBgn0011224	heph	231.453	1.2579	0.22093	5.69368	1.2433e-08	7.32932e-08	0.284882	0.229846	1.23944	0.215181	0.490394
FBgn0011225	jar	7439.28	0.57416	0.107264	5.35279	8.66094e-08	4.67601e-07	0.286698	0.107664	2.66288	0.00774741	0.0449772
FBgn0011227	ox	1102.24	-1.06512	0.174308	-6.11055	9.92853e-10	6.63157e-09	-0.233677	0.174109	-1.34213	0.179555	0.441507
FBgn0011230	poe	4186.4	-0.477965	0.186794	-2.55878	0.010504	0.0246876	0.433301	0.186725	2.32053	0.0203124	0.0967858
FBgn0011232	scat	631.537	0.141889	0.141671	1.00154	0.316567	0.431429	-0.147946	0.145486	-1.01691	0.309195	0.597896
FBgn0011236	ken	137.813	1.85805	0.349223	5.32052	1.03471e-07	5.54031e-07	-0.456305	0.37543	-1.21542	0.224206	0.502169
FBgn0011239	ms(2)35Ci	0	NA	NA	NA	NA	NA	NA	NA	NA	NA	NA
FBgn0011244	Hsp60B	0.21147	-2.28233	4.99094	-0.457295	0.647459	NA	-1.54913	4.99094	-0.310389	0.756265	NA
FBgn0011259	Sema1a	41.3636	0.89563	0.455949	1.96432	0.0494927	0.0957159	0.00135142	0.479579	0.00281794	0.997752	0.999625
FBgn0011260	Sema2a	638.059	0.882714	0.167662	5.26482	1.40323e-07	7.41424e-07	0.597649	0.170387	3.5076	0.000452171	0.0047121
FBgn0011270	Pglym87	0	NA	NA	NA	NA	NA	NA	NA	NA	NA	NA
FBgn0011272	RpL13	21149.4	-0.942638	0.0880699	-10.7033	9.82213e-27	1.92244e-25	-0.244603	0.0880786	-2.7771	0.0054846	0.0348434
FBgn0011273	Acam	0	NA	NA	NA	NA	NA	NA	NA	NA	NA	NA
FBgn0011274	Dif	1105.39	0.751114	0.136078	5.51973	3.39525e-08	1.90328e-07	-0.0825138	0.139306	-0.592321	0.553635	0.79834
FBgn0011276	HLH3B	0.116502	0.640197	4.99719	0.128111	0.898061	NA	0	4.99745	0	1	NA
FBgn0011277	HLH4C	0.328002	-0.814019	4.99026	-0.163121	0.870423	NA	-1.53818	4.99169	-0.308148	0.75797	NA
FBgn0011278	lbe	0	NA	NA	NA	NA	NA	NA	NA	NA	NA	NA
FBgn0011279	Obp69a	1.9919	-1.43715	2.05646	-0.698846	0.484648	0.596583	0.856546	1.8801	0.455587	0.648687	NA
FBgn0011280	Obp19d	1.56678	-3.14269	2.59272	-1.21212	0.225467	0.331252	-1.36364	2.37777	-0.573494	0.56631	NA
FBgn0011281	Obp83a	10.3927	0.666096	0.903117	0.737552	0.460787	0.574284	0.162887	0.943285	0.17268	0.862903	NA
FBgn0011282	Obp84a	0	NA	NA	NA	NA	NA	NA	NA	NA	NA	NA
FBgn0011283	Obp28a	0	NA	NA	NA	NA	NA	NA	NA	NA	NA	NA
FBgn0011284	RpS4	35684.4	-0.969075	0.108683	-8.91656	4.81005e-19	6.25668e-18	-0.351922	0.108695	-3.23772	0.0012049	0.0104484
FBgn0011286	RyR	75.9167	-0.605055	0.333503	-1.81424	0.0696407	0.127785	-0.327817	0.340249	-0.963461	0.335316	0.624104
FBgn0011288	Snap25	5.32217	2.46899	1.26233	1.95591	0.0504761	0.0974365	1.14472	1.34732	0.849623	0.395535	NA
FBgn0011289	TfIIA-L	905.911	0.104123	0.124429	0.836807	0.402701	0.517595	-0.0656408	0.127064	-0.516594	0.605439	0.827281
FBgn0011290	Taf12	288.985	0.101576	0.17372	0.58471	0.558743	0.662296	0.170462	0.178201	0.956571	0.338784	0.627048
FBgn0011291	Taf11	140.269	0.309624	0.232838	1.32978	0.183589	0.281464	0.174112	0.241082	0.722211	0.470165	0.741071
FBgn0011293	a10	0	NA	NA	NA	NA	NA	NA	NA	NA	NA	NA
FBgn0011294	a5	0	NA	NA	NA	NA	NA	NA	NA	NA	NA	NA
FBgn0011296	l(2)efl	452.337	-1.4483	0.314445	-4.6059	4.10685e-06	1.76741e-05	0.0723543	0.312062	0.231859	0.816648	0.937111
FBgn0011297	l(2)not	540.506	-0.405789	0.134476	-3.01756	0.00254818	0.0069455	-0.394941	0.138036	-2.86115	0.00422112	0.0280598
FBgn0011300	babo	1101.36	-0.463028	0.130187	-3.55663	0.000375642	0.00119099	0.0763161	0.130637	0.584187	0.559095	0.800918
FBgn0011305	Rsf1	267.87	-0.339305	0.1889	-1.79621	0.0724607	0.131889	0.0430697	0.191042	0.225446	0.821632	0.939339
FBgn0011327	Uch-L5	622.308	0.459116	0.172603	2.65995	0.00781513	0.019063	0.0726779	0.175923	0.413124	0.679515	0.87097
FBgn0011335	vers	324.754	0.328706	0.195006	1.68562	0.0918685	0.1602	-0.251286	0.201925	-1.24445	0.213333	0.488323
FBgn0011336	Stt3B	4091.36	-0.615578	0.107096	-5.74793	9.03445e-09	5.42432e-08	-0.642351	0.107775	-5.96013	2.52035e-09	1.24019e-07
FBgn0011361	ND-ACP	4716.83	-0.662754	0.113338	-5.84759	4.98741e-09	3.09462e-08	-0.211015	0.113512	-1.85896	0.0630321	0.221553
FBgn0011455	ND-SGDH	3200.5	-0.717445	0.110725	-6.47951	9.20206e-11	6.75402e-10	0.0302457	0.11072	0.273174	0.78472	0.922816
FBgn0011474	PR-Set7	224.2	0.172259	0.20644	0.834427	0.40404	0.518867	0.0734908	0.212221	0.346294	0.729122	0.897499
FBgn0011476	l(3)neo43	133.978	-0.162457	0.242407	-0.670183	0.502741	0.613261	-0.566736	0.255678	-2.2166	0.0266504	0.118453
FBgn0011481	Ssdp	713.544	-0.388637	0.130709	-2.9733	0.00294612	0.0079091	-0.121308	0.132377	-0.916385	0.359465	0.646386
FBgn0011509	SrpRbeta	1056.93	-0.677246	0.112894	-5.99897	1.98573e-09	1.28744e-08	-0.646361	0.115212	-5.61021	2.02084e-08	7.78024e-07
FBgn0011554	etaTry	3542.98	-1.16603	0.0920353	-12.6694	8.73946e-37	2.76918e-35	0.131492	0.0913661	1.43918	0.1501	0.392929
FBgn0011555	thetaTry	26152.5	-2.29005	0.172755	-13.2561	4.16231e-40	1.50205e-38	0.324937	0.172521	1.88346	0.0596382	0.213037
FBgn0011556	zetaTry	5496.96	-4.23067	0.121858	-34.7179	4.22331e-264	4.87698e-261	-0.715369	0.116939	-6.11745	9.5085e-10	5.32003e-08
FBgn0011559	Acp36DE	0.58542	2.96548	4.40893	0.672609	0.501196	NA	0	4.59392	0	1	NA
FBgn0011566	Smyd3	230.663	0.622636	0.191019	3.25954	0.00111591	0.00325687	0.125688	0.199563	0.629816	0.528815	0.7798
FBgn0011569	can	0.233855	1.64173	4.89224	0.335579	0.737189	NA	0	4.99745	0	1	NA
FBgn0011570	cpb	2091.04	0.839429	0.107771	7.78901	6.75358e-15	6.90846e-14	0.390228	0.109313	3.56982	0.000357233	0.00384812
FBgn0011573	Cdc37	1080.02	0.0259668	0.12566	0.206643	0.836289	0.886477	0.0662568	0.127338	0.520321	0.60284	0.826445
FBgn0011576	Cyp4d2	910.218	-1.34234	0.176385	-7.61028	2.73504e-14	2.67154e-13	-0.0554698	0.174997	-0.316976	0.751262	0.908165
FBgn0011581	Ms	3.03166	-4.74893	2.30108	-2.06378	0.0390383	0.0783102	-5.35952	2.31121	-2.31892	0.0203994	NA
FBgn0011582	Dop1R1	6.0019	1.04898	1.21027	0.866735	0.386087	0.500887	-0.911568	1.33699	-0.681808	0.49536	NA
FBgn0011584	Trp1	2679.15	-0.982536	0.120981	-8.12142	4.60777e-16	5.11084e-15	-0.243883	0.120947	-2.01645	0.0437529	0.169944
FBgn0011586	e(r)	680.116	-0.532796	0.130495	-4.08288	4.44805e-05	0.000164984	-0.270404	0.13244	-2.04171	0.0411801	0.162377
FBgn0011589	Elk	25.0766	-0.468027	0.513846	-0.910831	0.362384	0.477891	0.0312616	0.520689	0.0600389	0.952125	0.987902
FBgn0011591	fng	74.423	0.36589	0.328914	1.11242	0.265959	0.377421	0.646327	0.334421	1.93267	0.0532763	0.196484
FBgn0011592	fra	662.957	-0.388683	0.176225	-2.20561	0.0274113	0.0576691	0.152888	0.176788	0.86481	0.387143	0.668784
FBgn0011596	fzo	3.09083	0.604227	1.66634	0.362608	0.716898	0.796733	-1.46005	1.91535	-0.76229	0.445887	NA
FBgn0011603	ine	422.895	-1.85878	0.185733	-10.0078	1.40829e-23	2.3799e-22	-0.33607	0.180521	-1.86167	0.0626499	0.220855
FBgn0011604	Iswi	649.522	0.606656	0.144475	4.19903	2.6806e-05	0.000102689	0.135883	0.148466	0.915244	0.360063	0.646994
FBgn0011606	Klp3A	88.1454	0.441819	0.329278	1.34178	0.179668	0.276635	0.622009	0.334778	1.85797	0.0631726	0.22185
FBgn0011638	La	3140.72	1.51264	0.129635	11.6684	1.8476e-31	4.48648e-30	-0.272575	0.131937	-2.06594	0.0388337	0.155484
FBgn0011640	lark	1635.84	0.452201	0.108711	4.15965	3.18743e-05	0.000120418	0.00746409	0.110868	0.0673244	0.946323	0.985861
FBgn0011642	Zyx	983.41	0.206244	0.132103	1.56124	0.118467	0.19667	0.13036	0.134047	0.9725	0.330802	0.621262
FBgn0011648	Mad	1491.19	1.04972	0.120792	8.6903	3.61498e-18	4.45148e-17	0.187439	0.123543	1.51719	0.129219	0.357598
FBgn0011653	mas	0.627406	-0.763883	3.59734	-0.212346	0.831837	NA	-2.47052	3.73919	-0.660711	0.508797	NA
FBgn0011655	Med	733.703	0.502633	0.128075	3.92451	8.6905e-05	0.00030805	0.0760447	0.13189	0.576576	0.564226	0.803855
FBgn0011656	Mef2	956.877	-0.209436	0.194933	-1.0744	0.282643	0.395518	-0.417107	0.19668	-2.12074	0.0339437	0.141208
FBgn0011659	Mlh1	77.7956	1.51206	0.428067	3.53229	0.000411974	0.00129825	0.112841	0.449006	0.251314	0.801571	0.929905
FBgn0011660	Pms2	67.4726	1.53839	0.343959	4.4726	7.72744e-06	3.2086e-05	0.865533	0.360652	2.39991	0.0163991	0.0815638
FBgn0011661	Moe	11138.7	0.33687	0.129542	2.60047	0.00930955	0.0222474	0.170354	0.129735	1.3131	0.189151	0.453438
FBgn0011666	msi	87.4133	-0.372373	0.285194	-1.30568	0.191661	0.291474	-0.1011	0.291253	-0.34712	0.728501	0.897248
FBgn0011668	Mst57Da	0	NA	NA	NA	NA	NA	NA	NA	NA	NA	NA
FBgn0011669	Mst57Db	0	NA	NA	NA	NA	NA	NA	NA	NA	NA	NA
FBgn0011670	Mst57Dc	0	NA	NA	NA	NA	NA	NA	NA	NA	NA	NA
FBgn0011672	Mvl	1611.61	-0.617971	0.124732	-4.95441	7.25514e-07	3.46679e-06	-0.135084	0.125198	-1.07896	0.280603	0.568591
FBgn0011674	insc	552.102	0.691378	0.145304	4.75814	1.95381e-06	8.78665e-06	0.14758	0.150214	0.98247	0.325868	0.616617
FBgn0011676	Nos	33.7086	3.4456	0.595727	5.78385	7.30102e-09	4.42819e-08	0.603214	0.675083	0.89354	0.371568	0.655347
FBgn0011692	pav	43.7509	2.03371	0.440188	4.62009	3.83582e-06	1.66107e-05	0.470084	0.477774	0.983906	0.325162	0.616237
FBgn0011693	Pdh	9.20691	2.26048	1.98449	1.13907	0.254673	0.364425	4.03082	1.96874	2.04741	0.0406176	NA
FBgn0011694	EbpII	0	NA	NA	NA	NA	NA	NA	NA	NA	NA	NA
FBgn0011695	EbpIII	122.436	-0.584469	0.244988	-2.38571	0.0170462	0.0379686	-0.10263	0.248391	-0.413179	0.679475	0.87097
FBgn0011701	repo	1.57827	3.96671	2.72316	1.45666	0.14521	0.232861	2.42018	2.86591	0.844472	0.398406	NA
FBgn0011703	RnrL	462.484	2.85483	0.189814	15.0402	4.00546e-51	1.98232e-49	0.701169	0.20156	3.47872	0.000503822	0.00513951
FBgn0011704	RnrS	671.357	1.49452	0.171787	8.69984	3.32352e-18	4.11207e-17	-0.146012	0.179001	-0.815702	0.41467	0.694821
FBgn0011705	rost	1847.56	0.140099	0.110884	1.26347	0.206419	0.308279	-0.46008	0.113159	-4.06579	4.78699e-05	0.000699624
FBgn0011706	rpr	2.33723	3.97189	2.11346	1.87934	0.0601987	0.113301	3.9528	2.14604	1.84191	0.0654888	NA
FBgn0011708	Syx5	1442.37	-0.457091	0.132484	-3.45017	0.000560237	0.00172878	-0.412043	0.133813	-3.07925	0.00207519	0.0159347
FBgn0011710	Sep1	402.545	-0.0861533	0.160896	-0.535459	0.592332	0.693256	0.0763285	0.163776	0.466056	0.641176	0.848507
FBgn0011715	Snr1	406.815	0.205639	0.150861	1.3631	0.172851	0.268005	-0.0544701	0.156084	-0.34898	0.727104	0.896871
FBgn0011722	Tig	16.4836	-0.0506046	0.642395	-0.0787749	0.937212	0.95919	0.183193	0.657818	0.278486	0.780639	NA
FBgn0011723	byn	0	NA	NA	NA	NA	NA	NA	NA	NA	NA	NA
FBgn0011725	twin	702.082	0.167465	0.129613	1.29204	0.196342	0.297244	0.0592935	0.132431	0.447732	0.654346	0.857611
FBgn0011726	tsr	11906.7	0.534037	0.123875	4.31108	1.62456e-05	6.4443e-05	0.258596	0.124086	2.084	0.0371599	0.150663
FBgn0011737	Wee1	149.334	0.890107	0.238037	3.73937	0.000184482	0.000618691	0.154941	0.25105	0.617172	0.537122	0.786253
FBgn0011739	wts	610.026	-0.181601	0.169843	-1.06923	0.284968	0.397914	-0.0933623	0.171936	-0.543007	0.587125	0.816204
FBgn0011740	alpha-Man-IIa	81.2383	-0.573951	0.309205	-1.85622	0.0634227	0.118318	0.00484611	0.311534	0.0155556	0.987589	0.997092
FBgn0011741	Arp6	379.724	0.162214	0.161299	1.00568	0.314572	0.42916	-0.135017	0.166893	-0.809003	0.418513	0.699007
FBgn0011742	Arp2	4604.41	0.751421	0.0885845	8.48253	2.20342e-17	2.59051e-16	0.449028	0.0893266	5.02681	4.98696e-07	1.3642e-05
FBgn0011743	Arp53D	0	NA	NA	NA	NA	NA	NA	NA	NA	NA	NA
FBgn0011745	Arp1	2618.83	0.301527	0.101097	2.98254	0.00285872	0.00769347	0.10048	0.102208	0.983091	0.325563	0.616594
FBgn0011746	ana	11.6434	-0.032318	0.774531	-0.0417259	0.966717	0.978486	-0.641397	0.827269	-0.775318	0.438152	NA
FBgn0011747	Ank	3011.8	-0.51198	0.111156	-4.60595	4.10583e-06	1.76741e-05	0.205583	0.111172	1.84924	0.0644233	0.224936
FBgn0011754	PhKgamma	737.285	-0.0541552	0.151576	-0.357281	0.720881	0.799701	0.0820504	0.153482	0.534594	0.59293	0.820831
FBgn0011758	B-H1	0.21147	-2.28233	4.99094	-0.457295	0.647459	NA	-1.54913	4.99094	-0.310389	0.756265	NA
FBgn0011760	ctp	4880.61	0.211882	0.129143	1.64068	0.100863	0.172356	-0.152395	0.129725	-1.17475	0.240094	0.522494
FBgn0011761	dhd	49.3053	-3.20518	0.784378	-4.08627	4.38355e-05	0.000162766	-1.02404	0.754852	-1.35661	0.174906	0.434774
FBgn0011762	DNApol-alpha50	56.0652	1.22422	0.367166	3.33424	0.000855339	0.00254277	0.233669	0.392562	0.595241	0.551682	0.797079
FBgn0011763	Dp	1169.42	0.2202	0.120768	1.82333	0.0682536	0.125728	0.0471194	0.122791	0.383736	0.701174	0.883001
FBgn0011766	E2f1	1543.63	0.145264	0.12808	1.13416	0.256726	0.366899	-0.0648747	0.129637	-0.500433	0.61677	0.834145
FBgn0011768	Fdh	3128.79	-0.142536	0.128999	-1.10494	0.269187	0.380765	-0.309042	0.129787	-2.38115	0.0172585	0.0850247
FBgn0011769	Fdx1	126.891	0.319169	0.243855	1.30885	0.190587	0.290052	0.00602314	0.254522	0.0236645	0.98112	0.99585
FBgn0011770	Gip	803.261	-0.762479	0.172311	-4.42502	9.64319e-06	3.95196e-05	-0.457875	0.173531	-2.63858	0.0083254	0.047649
FBgn0011771	Hem	722.783	0.0232938	0.135028	0.172511	0.863036	0.905282	0.199287	0.136895	1.45577	0.145457	0.386367
FBgn0011774	Irbp	491.366	3.1002	0.189795	16.3345	5.61287e-60	3.45175e-58	0.846296	0.201455	4.20093	2.65823e-05	0.000434299
FBgn0011785	BRWD3	891.465	-0.612108	0.157023	-3.8982	9.69113e-05	0.000341076	-2.04483e-05	0.157346	-0.000129958	0.999896	1
FBgn0011787	mRpL12	867.371	0.109108	0.131798	0.827842	0.40776	0.522739	-0.42299	0.135677	-3.11761	0.00182321	0.0143987
FBgn0011802	Gem3	109.213	0.458279	0.276545	1.65716	0.0974873	0.167469	-0.226037	0.29152	-0.775373	0.438119	0.714532
FBgn0011812	Lcp1Psi	0	NA	NA	NA	NA	NA	NA	NA	NA	NA	NA
FBgn0011817	nmo	126.45	0.559635	0.243803	2.29544	0.021708	0.0469827	0.134742	0.254479	0.529481	0.596472	0.82268
FBgn0011818	oaf	381.621	0.299922	0.158514	1.89208	0.0584803	0.110566	-0.0446887	0.162939	-0.274266	0.78388	0.922421
FBgn0011822	Pgcl	4521.83	0.392201	0.0908595	4.31657	1.58474e-05	6.30078e-05	0.704574	0.0911623	7.72879	1.08577e-14	1.45634e-12
FBgn0011824	CG4038	878.212	-0.619039	0.160941	-3.84636	0.000119885	0.000415877	-0.585119	0.162852	-3.59296	0.000326949	0.00359168
FBgn0011826	Pp2B-14D	1051.17	-0.191642	0.139707	-1.37175	0.170141	0.264594	0.166228	0.140676	1.18163	0.237351	0.518613
FBgn0011828	Pxn	84.5734	-1.61637	0.363411	-4.44778	8.67614e-06	3.58106e-05	-0.360577	0.356107	-1.01255	0.311274	0.599825
FBgn0011829	Ret	37.8528	-0.936505	0.474943	-1.97182	0.0486297	0.094363	0.408912	0.46259	0.88396	0.376718	0.658389
FBgn0011832	Ser12	0	NA	NA	NA	NA	NA	NA	NA	NA	NA	NA
FBgn0011834	Ser6	1308.83	-1.63977	0.146851	-11.1662	5.96814e-29	1.30583e-27	0.141762	0.1444	0.981734	0.326231	0.616857
FBgn0011836	Taf2	364.713	0.792099	0.169523	4.67251	2.97541e-06	1.30921e-05	0.126289	0.176585	0.715173	0.474502	0.744183
FBgn0011837	Tis11	1412.06	0.279007	0.116316	2.39869	0.0164537	0.0368701	0.248284	0.117447	2.11401	0.0345147	0.143012
FBgn0011877	tRNA:His-GTG-2-1Psi	0.11735	0.645466	4.99681	0.129176	0.897219	NA	0	4.99745	0	1	NA
FBgn0012034	AcCoAS	6323.86	-0.195058	0.136737	-1.42651	0.153721	0.243606	0.513144	0.13675	3.75242	0.000175136	0.00213273
FBgn0012036	Aldh	8759.66	-1.38357	0.188499	-7.33995	2.13666e-13	1.93941e-12	-0.299458	0.188409	-1.5894	0.11197	0.327867
FBgn0012037	Ance	18874.1	-2.35276	0.124905	-18.8363	3.80608e-79	3.53184e-77	-0.0477603	0.124531	-0.383521	0.701334	0.883011
FBgn0012042	AttA	2.44018	2.21171	1.98492	1.11426	0.265169	0.376695	-1.06092	2.41796	-0.438769	0.660829	NA
FBgn0012051	CalpA	267.405	-0.154303	0.200049	-0.771328	0.440513	0.554801	0.40042	0.201728	1.98496	0.0471494	0.179778
FBgn0012058	Cdc27	458.413	0.237871	0.152871	1.55602	0.119703	0.19848	0.0244994	0.157086	0.155962	0.876063	0.960113
FBgn0012344	Dh44	39.8884	3.74793	0.536571	6.98496	2.84942e-12	2.39596e-11	1.7949	0.581591	3.08619	0.00202739	0.0156544
FBgn0013263	Trl	1233.84	0.175576	0.12746	1.3775	0.168357	0.262448	-0.166116	0.129627	-1.28149	0.200022	0.469483
FBgn0013269	FK506-bp1	1985.06	-0.0459817	0.164979	-0.278713	0.780465	0.84661	-0.770489	0.16669	-4.62229	3.79524e-06	8.32749e-05
FBgn0013272	Gp150	22088.9	-0.270971	0.100862	-2.68655	0.00721943	0.0177589	0.209594	0.100901	2.07722	0.0377808	0.152482
FBgn0013275	Hsp70Aa	91.5333	23.0855	4.78498	4.82457	1.40308e-06	6.46089e-06	0	4.99745	0	1	1
FBgn0013276	Hsp70Ab	785.935	4.27284	1.17644	3.63201	0.000281218	0.000911065	1.32953	1.17827	1.12837	0.259164	0.545621
FBgn0013277	Hsp70Ba	6.76993	6.26134	3.56634	1.75568	0.0791437	0.14177	3.76247	3.61583	1.04055	0.298083	NA
FBgn0013278	Hsp70Bb	289.321	6.23474	1.91815	3.25038	0.0011525	0.00335144	2.55088	1.92303	1.32649	0.184677	0.447227
FBgn0013279	Hsp70Bc	60.9799	3.81531	2.06549	1.84717	0.064723	0.120269	0.804353	2.07977	0.38675	0.698941	0.881394
FBgn0013300	ProtA	0	NA	NA	NA	NA	NA	NA	NA	NA	NA	NA
FBgn0013301	ProtB	0	NA	NA	NA	NA	NA	NA	NA	NA	NA	NA
FBgn0013303	Nca	424.891	-0.362476	0.151235	-2.39678	0.01654	0.0370076	-0.219653	0.154378	-1.42283	0.154786	0.400774
FBgn0013305	Nmda1	2126.78	1.30467	0.101584	12.8433	9.38301e-38	3.086e-36	0.171292	0.104312	1.64212	0.100565	0.306337
FBgn0013307	Odc1	27.4319	-1.58429	0.633962	-2.49902	0.0124537	0.0287753	-0.560844	0.626458	-0.895261	0.370647	0.654834
FBgn0013308	Odc2	0.78428	-2.28041	3.56032	-0.640507	0.521843	NA	1.45333	3.36144	0.432354	0.665484	NA
FBgn0013323	Ptth	12.5452	-0.920012	0.785103	-1.17184	0.241263	0.349352	-0.720209	0.828115	-0.869697	0.384466	NA
FBgn0013325	RpL11	29728.7	-1.2222	0.0895933	-13.6417	2.26224e-42	8.93971e-41	-0.560536	0.0896086	-6.25539	3.96535e-10	2.407e-08
FBgn0013334	Sap47	1103.2	-0.70907	0.126502	-5.6052	2.0801e-08	1.19571e-07	0.269874	0.125746	2.14619	0.0318582	0.13462
FBgn0013342	nSyb	67.9282	-0.715764	0.397032	-1.80279	0.0714218	0.130409	0.405547	0.39321	1.03137	0.302365	0.590803
FBgn0013343	Syx1A	1247.33	0.903593	0.143929	6.27807	3.42809e-10	2.39597e-09	0.287758	0.14619	1.96839	0.0490234	0.18514
FBgn0013347	TfIIA-S	774.07	-0.633399	0.175687	-3.60527	0.000311825	0.0010021	-0.0294418	0.17609	-0.167197	0.867215	0.956248
FBgn0013348	TpnC41C	2.02654	0.94096	1.90688	0.493454	0.621692	0.717358	-0.254831	2.08668	-0.122122	0.902802	NA
FBgn0013432	bcn92	262.432	0.532652	0.210277	2.53309	0.0113061	0.0263462	-0.422409	0.220848	-1.91267	0.0557904	0.20247
FBgn0013433	beat-Ia	0	NA	NA	NA	NA	NA	NA	NA	NA	NA	NA
FBgn0013435	Cdc2rk	108.525	0.608137	0.278361	2.18471	0.0289104	0.060468	0.119108	0.290944	0.409385	0.682258	0.872441
FBgn0013467	igl	13.6353	-0.915605	0.76614	-1.19509	0.232053	0.338904	0.739178	0.73058	1.01177	0.311649	NA
FBgn0013469	klu	132.366	0.0457118	0.262067	0.174428	0.861529	0.904139	0.495797	0.264725	1.87288	0.0610854	0.216605
FBgn0013531	MED20	143.386	0.448572	0.232982	1.92535	0.0541852	0.103729	0.179032	0.242222	0.739125	0.459831	0.733542
FBgn0013548	l(2)dtl	96.6544	1.01865	0.294502	3.45891	0.000542376	0.00167765	0.118296	0.312319	0.378768	0.70486	0.885709
FBgn0013563	Pex1	877.56	-1.2725	0.142869	-8.90681	5.25215e-19	6.8232e-18	-0.0956756	0.141465	-0.67632	0.498838	0.760444
FBgn0013576	mtd	4607.27	-0.252641	0.134273	-1.88154	0.0598981	0.112837	0.0114139	0.134551	0.0848296	0.932397	0.98075
FBgn0013672	mt:ATPase6	42538	-0.941318	0.0956944	-9.83671	7.82284e-23	1.24507e-21	-0.149383	0.0956794	-1.56129	0.118455	0.340149
FBgn0013673	mt:ATPase8	24.7305	-1.24091	0.539822	-2.29874	0.0215198	0.0466045	-0.516022	0.543198	-0.94997	0.342127	0.63042
FBgn0013674	mt:CoI	225138	-1.04345	0.131965	-7.907	2.63671e-15	2.76243e-14	-0.255031	0.131963	-1.93259	0.0532865	0.196484
FBgn0013675	mt:CoII	50650.7	-1.14448	0.102798	-11.1333	8.64251e-29	1.87128e-27	-0.20162	0.102775	-1.96176	0.0497909	0.187358
FBgn0013676	mt:CoIII	163259	-1.117	0.116791	-9.5641	1.13181e-21	1.69984e-20	-0.171915	0.116784	-1.47207	0.141002	0.378248
FBgn0013678	mt:Cyt-b	94977.1	-1.00875	0.122861	-8.21045	2.20358e-16	2.49475e-15	-0.148838	0.122854	-1.21151	0.2257	0.503891
FBgn0013679	mt:ND1	16021.4	-1.02796	0.139363	-7.37614	1.62947e-13	1.49736e-12	-0.144941	0.139318	-1.04036	0.298173	0.586751
FBgn0013680	mt:ND2	696.26	-0.935057	0.310691	-3.0096	0.00261593	0.00710966	-0.0590987	0.310448	-0.190366	0.849023	0.949251
FBgn0013681	mt:ND3	4338.42	-1.21451	0.13187	-9.20995	3.2629e-20	4.57026e-19	-0.25683	0.131714	-1.94991	0.051187	0.191271
FBgn0013683	mt:ND4L	24.1387	-1.14345	0.529754	-2.15846	0.0308921	0.0640202	0.0382982	0.515784	0.0742524	0.94081	0.983751
FBgn0013684	mt:ND5	25932.7	-0.748582	0.153924	-4.86332	1.15433e-06	5.36535e-06	-0.141325	0.153927	-0.918132	0.35855	0.646195
FBgn0013685	mt:ND6	18.7828	-0.94935	0.658366	-1.44198	0.149308	0.237817	-0.245225	0.659202	-0.372003	0.709891	NA
FBgn0013687	mt:ori	0	NA	NA	NA	NA	NA	NA	NA	NA	NA	NA
FBgn0013717	not	430.888	0.703004	0.175112	4.01459	5.95484e-05	0.000216167	-0.059092	0.181382	-0.325788	0.744585	0.905827
FBgn0013718	nuf	349.404	0.164327	0.17789	0.923754	0.355614	0.471175	-0.69139	0.186331	-3.71055	0.000206808	0.002471
FBgn0013720	pck	111.571	0.00342681	0.28988	0.0118215	0.990568	0.994203	-0.453171	0.302849	-1.49636	0.13456	0.366568
FBgn0013725	phyl	2.87468	3.36702	2.14681	1.56838	0.116792	0.194351	1.46163	2.28259	0.64034	0.521952	NA
FBgn0013726	pnut	1490.36	1.32311	0.129353	10.2287	1.47511e-24	2.65239e-23	0.391578	0.131948	2.96767	0.00300069	0.0213828
FBgn0013732	sced	66.7239	0.432841	0.343992	1.25829	0.208288	0.310623	-0.00751174	0.360312	-0.0208479	0.983367	0.997092
FBgn0013733	shot	6404.62	-0.535749	0.162972	-3.28737	0.00101129	0.0029766	0.33447	0.162947	2.05263	0.0401082	0.159208
FBgn0013746	alien	1106.18	-0.14306	0.156621	-0.913414	0.361025	0.476521	-0.0154799	0.15793	-0.0980177	0.921918	0.976261
FBgn0013749	Arf102F	3037.67	-0.586709	0.130153	-4.50783	6.54955e-06	2.74695e-05	-0.469357	0.130726	-3.59038	0.000330199	0.00361307
FBgn0013750	Arf51F	1312.58	-0.0736625	0.112378	-0.655491	0.512152	0.621183	-0.024742	0.113883	-0.217258	0.828007	0.942235
FBgn0013751	Awh	0	NA	NA	NA	NA	NA	NA	NA	NA	NA	NA
FBgn0013753	Bgb	39.8666	-0.222599	0.51942	-0.428552	0.668249	0.757126	-0.0988988	0.52942	-0.186806	0.851813	0.950318
FBgn0013755	Bro	3.32443	2.88813	1.86504	1.54856	0.121487	0.200836	-2.47143	2.34017	-1.05609	0.290927	NA
FBgn0013756	Mtor	1250.47	-0.135579	0.170934	-0.793165	0.427682	0.541929	0.0636918	0.171772	0.370794	0.710791	0.888596
FBgn0013759	CASK	1480.77	-0.250121	0.118364	-2.11315	0.0345875	0.0705808	0.141086	0.119007	1.18553	0.235808	0.516496
FBgn0013762	Cdk5	476.044	0.703174	0.178906	3.93042	8.47978e-05	0.000300786	0.403981	0.182423	2.21453	0.0267925	0.11883
FBgn0013763	Idgf6	96.8714	-1.78271	0.325688	-5.47366	4.40834e-08	2.43961e-07	-0.259535	0.313806	-0.827056	0.408205	0.687869
FBgn0013764	Chi	516.807	0.348528	0.143845	2.42294	0.0153954	0.0348139	0.058336	0.148161	0.393733	0.693778	0.878152
FBgn0013765	cnn	705.638	3.07931	0.172499	17.8512	2.83138e-71	2.26358e-69	1.29345	0.17904	7.22434	5.03533e-13	5.04503e-11
FBgn0013767	Crz	0	NA	NA	NA	NA	NA	NA	NA	NA	NA	NA
FBgn0013770	Cp1	11594	0.0973417	0.0902967	1.07802	0.281024	0.393571	0.50047	0.0903972	5.53635	3.08847e-08	1.15174e-06
FBgn0013771	Cyp6a9	1528.99	-1.21733	0.122956	-9.90056	4.1393e-23	6.7009e-22	0.379897	0.121093	3.13724	0.00170549	0.0135851
FBgn0013772	Cyp6a8	75.0418	-6.47405	0.839974	-7.70743	1.28373e-14	1.29281e-13	-1.171	0.553585	-2.1153	0.034404	0.142838
FBgn0013773	Cyp6a22	32.2813	1.20899	0.518207	2.33303	0.0196465	0.0429503	0.268141	0.548435	0.488921	0.624898	0.838981
FBgn0013799	Deaf1	472.221	0.0313007	0.147892	0.211646	0.832383	0.883382	-0.070635	0.151613	-0.465891	0.641293	0.848528
FBgn0013810	Dhc36C	2.20433	0.759883	1.80946	0.41995	0.674522	0.76199	-0.124279	1.93907	-0.0640924	0.948897	NA
FBgn0013811	Dhc62B	91.1567	0.467084	0.297371	1.57071	0.11625	0.193743	0.245714	0.308089	0.797543	0.425136	0.703728
FBgn0013812	Dhc93AB	1.26921	2.63901	2.65043	0.995694	0.319399	0.43398	3.41235	2.64853	1.28839	0.19761	NA
FBgn0013813	Dhc98D	1.11546	0.733302	3.31373	0.221292	0.824865	NA	1.40985	3.31844	0.424852	0.670944	NA
FBgn0013949	Elal	13.3657	-3.39133	1.04906	-3.23273	0.00122615	0.0035487	-1.15814	0.995724	-1.16311	0.244785	NA
FBgn0013953	Esp	8.7693	-1.20432	0.909866	-1.32363	0.185627	0.283912	-0.0101729	0.890181	-0.0114279	0.990882	NA
FBgn0013954	FK506-bp2	4953.92	-0.461991	0.1465	-3.15351	0.00161318	0.00456708	-0.334222	0.146813	-2.27652	0.0228148	0.105404
FBgn0013972	Gycalpha99B	22.6143	-1.39154	0.592663	-2.34795	0.0188773	0.0414483	-0.0170722	0.572097	-0.0298414	0.976194	0.994409
FBgn0013973	Gycbeta100B	5.1936	-0.32112	1.10501	-0.290602	0.771355	0.840112	-0.418069	1.15611	-0.361616	0.717639	NA
FBgn0013981	His4r	6667.43	-2.01631	0.09854	-20.4618	4.71474e-93	5.26885e-91	-0.571227	0.0979868	-5.82964	5.55478e-09	2.4571e-07
FBgn0013983	imd	383.861	0.771145	0.155536	4.95799	7.1226e-07	3.40659e-06	0.336057	0.161322	2.08314	0.0372385	0.15084
FBgn0013987	MAPk-Ak2	3363.21	0.642023	0.0924429	6.94507	3.78263e-12	3.1526e-11	0.36032	0.093404	3.85765	0.000114481	0.00147601
FBgn0013995	Calx	3546.9	-0.281587	0.0974077	-2.89081	0.0038425	0.0100592	0.0753863	0.0977873	0.770921	0.440754	0.717562
FBgn0013997	Nrx-IV	460.946	0.494773	0.14804	3.34215	0.00083131	0.00248199	0.0550229	0.153416	0.358651	0.719856	0.893456
FBgn0014000	Hf	41.5509	0.513526	0.503661	1.01959	0.307925	0.422087	-0.0277159	0.523147	-0.0529792	0.957749	0.989301
FBgn0014002	Pdi	17782.2	-1.22398	0.105064	-11.6499	2.29784e-31	5.56677e-30	-0.511122	0.105069	-4.86461	1.14682e-06	2.88126e-05
FBgn0014006	Ask1	836.392	-0.487355	0.124679	-3.90887	9.2729e-05	0.000327577	0.148889	0.125076	1.19038	0.233897	0.514029
FBgn0014007	Ptp69D	333.079	-0.142166	0.169653	-0.837978	0.402043	0.517172	0.0554294	0.172715	0.320929	0.748264	0.906763
FBgn0014009	Rab2	2623.1	0.182298	0.104157	1.75022	0.0800802	0.143175	0.347977	0.104797	3.32048	0.000898623	0.00824829
FBgn0014010	Rab5	6098.28	0.11852	0.0924687	1.28174	0.199935	0.301296	0.450628	0.092691	4.86162	1.16428e-06	2.91632e-05
FBgn0014011	Rac2	2087.11	1.05718	0.110403	9.5756	1.01265e-21	1.52972e-20	0.470084	0.112009	4.19683	2.7068e-05	0.000439643
FBgn0014018	Rel	4705.65	1.84937	0.132103	13.9995	1.57004e-44	6.74274e-43	0.451732	0.133195	3.39152	0.000695069	0.00662866
FBgn0014019	Rh5	5.95192	1.28808	1.38653	0.928993	0.352893	0.468084	-0.112255	1.47571	-0.076069	0.939364	NA
FBgn0014020	Rho1	9961.64	0.459096	0.0994506	4.61632	3.90602e-06	1.68936e-05	0.431366	0.099644	4.32907	1.49739e-05	0.00026382
FBgn0014022	Rlb1	188.803	0.662147	0.232855	2.8436	0.00446066	0.0115093	0.219937	0.241001	0.912598	0.361454	0.648007
FBgn0014023	mRpL47	725.999	-0.184861	0.138124	-1.33837	0.180775	0.278052	-0.698823	0.142822	-4.89295	9.93355e-07	2.58148e-05
FBgn0014024	Rnp4F	611.685	0.201855	0.139573	1.44624	0.148111	0.236512	0.0624103	0.142916	0.436694	0.662333	0.861901
FBgn0014026	RpL7A	45465.5	-1.13222	0.100225	-11.2967	1.36221e-29	3.07771e-28	-0.458667	0.100233	-4.57601	4.7393e-06	0.000101577
FBgn0014028	SdhB	3433.58	-0.288432	0.12693	-2.27238	0.0230638	0.0495276	0.0255873	0.127262	0.20106	0.840652	0.946902
FBgn0014029	Sep2	1163.37	0.836855	0.111864	7.48103	7.3745e-14	6.93603e-13	0.251171	0.114951	2.18503	0.0288864	0.125572
FBgn0014031	Spat	47.544	0.25834	0.522237	0.49468	0.620826	0.716518	-0.0705539	0.536118	-0.131601	0.8953	0.96864
FBgn0014032	Sptr	390.212	-0.472996	0.182849	-2.58681	0.00968697	0.0230223	-0.135931	0.184859	-0.735322	0.462143	0.735115
FBgn0014033	Sr-CI	35.4247	-0.726903	0.55746	-1.30396	0.192249	0.292325	0.0992825	0.556701	0.178341	0.858455	0.952625
FBgn0014037	Su(Tpl)	2130.32	0.426678	0.108491	3.93283	8.39516e-05	0.000298192	0.184205	0.109664	1.67971	0.0930129	0.290234
FBgn0014073	Tie	18.6646	-2.1791	0.769864	-2.8305	0.00464751	0.0119204	-0.214511	0.722991	-0.296699	0.766696	NA
FBgn0014075	Ugt	1016.2	-0.238932	0.137356	-1.73951	0.0819443	0.145855	-0.403583	0.139674	-2.88947	0.00385887	0.0263029
FBgn0014076	Vm32E	0.204461	0	4.99745	0	1	NA	1.4276	4.9887	0.286166	0.774751	NA
FBgn0014092	CG4278	430.954	0.014306	0.170663	0.0838259	0.933195	0.956573	-0.197256	0.175012	-1.1271	0.259699	0.54599
FBgn0014127	barr	118.352	0.212131	0.265644	0.798555	0.424548	0.53901	0.155977	0.273632	0.570024	0.568661	0.806857
FBgn0014133	bif	4143.79	0.763933	0.130735	5.84336	5.11594e-09	3.16488e-08	0.608578	0.131207	4.63829	3.51295e-06	7.76961e-05
FBgn0014135	bnl	252.127	-0.319795	0.287853	-1.11097	0.266582	0.378157	0.777102	0.286182	2.71541	0.00661935	0.0398023
FBgn0014141	cher	510.647	0.425418	0.149038	2.85443	0.00431138	0.0111741	0.419493	0.152024	2.75938	0.00579108	0.0362095
FBgn0014143	croc	4.45562	0.224479	1.18443	0.189525	0.849681	0.895521	-0.740051	1.30053	-0.569038	0.56933	NA
FBgn0014163	fax	278.332	-0.767303	0.205378	-3.73605	0.000186932	0.000625694	-0.516898	0.208665	-2.47716	0.0132432	0.0687883
FBgn0014179	gcm	0.11735	0.645466	4.99681	0.129176	0.897219	NA	0	4.99745	0	1	NA
FBgn0014184	Oda	27984.9	-0.977912	0.0881577	-11.0928	1.36032e-28	2.90305e-27	0.129246	0.0880953	1.46712	0.142343	0.38062
FBgn0014189	Hel25E	2210.26	0.644012	0.10517	6.12353	9.15245e-10	6.12501e-09	-0.123426	0.107312	-1.15016	0.250078	0.533679
FBgn0014269	prod	363.085	0.266183	0.20291	1.31183	0.189577	0.288727	0.074079	0.206865	0.358104	0.720266	0.893456
FBgn0014340	mof	90.7985	0.242487	0.279723	0.866883	0.386006	0.500844	0.0106503	0.291786	0.0365006	0.970883	0.992363
FBgn0014342	mia	474.494	-0.0683418	0.215736	-0.316784	0.751407	0.824433	-0.0754368	0.218156	-0.345793	0.729499	0.897678
FBgn0014343	mirr	30.8114	-1.08325	0.473577	-2.28738	0.0221735	0.0478806	-0.365304	0.473556	-0.771406	0.440466	0.717234
FBgn0014366	noi	482.148	1.04243	0.153564	6.78829	1.13472e-11	9.04384e-11	0.106761	0.160597	0.664776	0.506194	0.763763
FBgn0014368	nol	0.116502	0.640197	4.99719	0.128111	0.898061	NA	0	4.99745	0	1	NA
FBgn0014380	RhoL	3586.48	-0.0935542	0.109346	-0.855582	0.392229	0.507588	0.265524	0.109663	2.42127	0.0154665	0.0778568
FBgn0014388	sty	952.379	0.44038	0.14233	3.09408	0.00197425	0.00548913	0.321611	0.14418	2.23062	0.0257064	0.11518
FBgn0014391	sun	2619.1	-1.04847	0.13944	-7.51917	5.51249e-14	5.24165e-13	-0.200516	0.139326	-1.43919	0.150098	0.392929
FBgn0014395	tilB	165.474	-1.17881	0.255138	-4.6203	3.83185e-06	1.66004e-05	-0.0819482	0.25177	-0.325489	0.744811	0.905827
FBgn0014396	tim	5862.58	0.23294	0.200052	1.1644	0.244264	0.352784	-0.472221	0.200476	-2.35549	0.0184981	0.0897491
FBgn0014411	Vps26	1029.94	0.137155	0.116453	1.17777	0.238887	0.346492	0.178965	0.11827	1.51319	0.130232	0.359041
FBgn0014417	CG13397	873.352	0.86241	0.24151	3.57091	0.000355743	0.00113273	0.00932556	0.243936	0.0382295	0.969505	0.991929
FBgn0014427	CG11899	889.488	-0.368594	0.137343	-2.68376	0.00727999	0.0178952	-0.60661	0.140347	-4.32223	1.54462e-05	0.000269313
FBgn0014454	Acp1	0	NA	NA	NA	NA	NA	NA	NA	NA	NA	NA
FBgn0014455	Ahcy	3295.24	-0.59866	0.106022	-5.64658	1.63667e-08	9.51336e-08	-0.488114	0.106706	-4.5744	4.77582e-06	0.000101893
FBgn0014464	Cp7Fa	4.02208	4.1727	1.88189	2.21729	0.0266033	0.056187	-0.0662403	2.347	-0.0282234	0.977484	NA
FBgn0014465	Cp7Fb	2.11011	4.57218	2.50562	1.82477	0.0680355	0.125371	1.81702	2.82711	0.64271	0.520412	NA
FBgn0014466	Cp7Fc	0.41859	1.64213	4.15378	0.395335	0.692596	NA	1.3544	4.27277	0.316984	0.751256	NA
FBgn0014469	Cyp4e2	867.112	-1.0747	0.214789	-5.00351	5.62945e-07	2.74423e-06	0.128264	0.213863	0.599746	0.548675	0.795049
FBgn0014848	Eig71Eh	0	NA	NA	NA	NA	NA	NA	NA	NA	NA	NA
FBgn0014849	Eig71Ei	0	NA	NA	NA	NA	NA	NA	NA	NA	NA	NA
FBgn0014850	Eig71Ej	0	NA	NA	NA	NA	NA	NA	NA	NA	NA	NA
FBgn0014851	Eig71Ek	0	NA	NA	NA	NA	NA	NA	NA	NA	NA	NA
FBgn0014857	His3.3A	3421.15	0.0428797	0.136372	0.314431	0.753194	0.825819	0.0617101	0.136883	0.450823	0.652117	0.856232
FBgn0014859	Hr38	28.2364	1.65417	0.629424	2.62807	0.00858713	0.0206971	0.766112	0.656794	1.16644	0.243436	0.526348
FBgn0014861	Mcm2	140.2	1.29056	0.243735	5.29494	1.19055e-07	6.32586e-07	0.298701	0.259086	1.1529	0.248951	0.532295
FBgn0014863	Mlp84B	602.99	-0.753194	0.177407	-4.24556	2.18047e-05	8.47799e-05	0.0193134	0.177206	0.108989	0.913212	0.97222
FBgn0014865	Mtk	2.747	2.27261	1.93124	1.17676	0.239291	0.346951	-0.06903	2.15566	-0.0320227	0.974454	NA
FBgn0014868	Ost48	2839.38	-0.309857	0.126725	-2.44512	0.0144802	0.0329235	-0.820225	0.128097	-6.40315	1.52203e-10	1.01258e-08
FBgn0014869	Pglym78	2379.72	-0.139542	0.166795	-0.836607	0.402814	0.517612	-0.0969611	0.167381	-0.579283	0.562398	0.802888
FBgn0014870	Psi	749.561	0.452868	0.134024	3.379	0.000727496	0.00219601	0.169037	0.136923	1.23454	0.217002	0.493867
FBgn0014877	Roe1	1027.98	0.0456865	0.122678	0.372409	0.709588	0.790883	-0.628389	0.126773	-4.95682	7.16545e-07	1.90377e-05
FBgn0014879	Set	726.957	0.423953	0.15613	2.71539	0.00661977	0.0164199	-0.276118	0.160389	-1.72155	0.0851514	0.272668
FBgn0014903	CG14630	4334.39	-1.28446	0.134954	-9.5178	1.76889e-21	2.60397e-20	0.614951	0.134136	4.58454	4.54983e-06	9.87894e-05
FBgn0014906	Hydr2	3836.73	0.414768	0.185674	2.23385	0.0254928	0.0541703	0.471438	0.185955	2.53522	0.0112376	0.0606675
FBgn0014930	CG2846	1133.78	0.105853	0.158779	0.66667	0.504983	0.614842	-0.103085	0.160509	-0.642239	0.520718	0.773819
FBgn0014931	CG2678	80.2327	0.18812	0.328091	0.573377	0.56639	0.669299	0.0224008	0.339459	0.0659898	0.947386	0.98624
FBgn0014949	btn	0.51514	-0.868726	4.02979	-0.215576	0.829318	NA	-0.150954	4.02501	-0.0375041	0.970083	NA
FBgn0015000	betaggt-I	1156.88	0.361817	0.121524	2.97733	0.00290771	0.00780875	0.111811	0.123703	0.903868	0.366065	0.651305
FBgn0015001	iotaTry	4719.81	-5.02214	0.19198	-26.1598	7.62744e-151	2.83114e-148	-0.394212	0.184557	-2.13599	0.0326801	0.137187
FBgn0015008	Actn3	0.233004	1.63695	4.89259	0.334578	0.737944	NA	0	4.99745	0	1	NA
FBgn0015010	Ag5r	355.682	-2.98899	1.15198	-2.59465	0.00946881	0.0225531	-3.6758	1.15673	-3.17775	0.00148421	0.0122813
FBgn0015011	AhcyL2	982.307	0.241301	0.159041	1.51723	0.129209	0.211642	-0.155765	0.161484	-0.964589	0.334751	0.623669
FBgn0015019	CCT3	4537.79	0.702873	0.105513	6.66151	2.71034e-11	2.09276e-10	-0.334777	0.106795	-3.13476	0.00171993	0.0136871
FBgn0015024	CkIalpha	3052.59	-0.140821	0.106403	-1.32347	0.185678	0.283912	0.149979	0.106823	1.404	0.16032	0.409262
FBgn0015025	CkIIalpha-i1	109.498	2.0095	0.282944	7.10212	1.22857e-12	1.05612e-11	0.688114	0.302596	2.27403	0.0229641	0.105805
FBgn0015031	cype	2857.02	-0.877347	0.126315	-6.94572	3.76543e-12	3.14078e-11	0.0855444	0.126096	0.678408	0.497513	0.759306
FBgn0015032	Cyp4c3	0.781847	-3.20035	3.504	-0.913342	0.361063	NA	-0.0234112	3.35222	-0.00698378	0.994428	NA
FBgn0015033	Cyp4d8	283.086	-1.11957	0.340917	-3.284	0.00102344	0.00300724	-1.965	0.35016	-5.61173	2.00309e-08	7.74778e-07
FBgn0015034	Cyp4e1	37.2466	1.82695	0.536646	3.40439	0.000663109	0.00201629	-0.236564	0.588916	-0.401694	0.68791	0.874824
FBgn0015035	Cyp4e3	13.7795	3.34343	0.923678	3.6197	0.000294949	0.00095199	1.01207	1.01053	1.00152	0.316574	NA
FBgn0015036	Cyp4ae1	1595.24	-1.18849	0.148374	-8.0101	1.14619e-15	1.23444e-14	0.267236	0.147195	1.81553	0.069443	0.237064
FBgn0015037	Cyp4p1	4001.9	0.135887	0.165777	0.819697	0.412389	0.527562	0.277681	0.166059	1.67218	0.0944889	0.293138
FBgn0015038	Cyp9b1	635.918	0.317781	0.165171	1.92396	0.0543599	0.103987	-0.247009	0.169325	-1.45878	0.144625	0.384864
FBgn0015039	Cyp9b2	18800.5	2.01149	0.427768	4.70231	2.57241e-06	1.13863e-05	0.412992	0.427864	0.96524	0.334425	0.623669
FBgn0015040	Cyp9c1	1207.77	0.590525	0.123542	4.77995	1.75336e-06	7.94364e-06	-0.243342	0.127088	-1.91476	0.0555235	0.201895
FBgn0015075	Ddx1	406.861	0.564391	0.150658	3.74619	0.000179543	0.000603684	0.0113335	0.157293	0.072053	0.94256	0.984604
FBgn0015218	eIF4E1	3365.72	-0.115123	0.102385	-1.12441	0.260838	0.371558	-0.0909903	0.103132	-0.882266	0.377633	0.659055
FBgn0015221	Fer2LCH	31061.2	-0.231633	0.104467	-2.21728	0.0266041	0.056187	0.13124	0.104505	1.25582	0.209179	0.4824
FBgn0015222	Fer1HCH	37112.1	-0.364177	0.10708	-3.40098	0.000671448	0.00204046	-0.010067	0.107113	-0.0939849	0.925121	0.976804
FBgn0015229	glec	369.621	1.14593	0.236077	4.85406	1.20958e-06	5.6046e-06	-0.288778	0.244697	-1.18014	0.237944	0.519218
FBgn0015230	Glut3	0	NA	NA	NA	NA	NA	NA	NA	NA	NA	NA
FBgn0015239	Hr78	671.611	-0.317946	0.136826	-2.32372	0.0201405	0.0439103	-0.159458	0.139003	-1.14716	0.251315	0.534783
FBgn0015240	Hr96	2008.38	0.441179	0.105227	4.19263	2.75742e-05	0.000105437	0.770997	0.105782	7.28852	3.13369e-13	3.26729e-11
FBgn0015245	Hsp60A	7666.56	0.0181317	0.100956	0.1796	0.857467	0.901032	-0.651292	0.101638	-6.40798	1.47459e-10	9.8893e-09
FBgn0015247	Diap2	1215.22	0.123546	0.141118	0.875481	0.381312	0.496552	-0.0557878	0.142884	-0.390441	0.696211	0.879601
FBgn0015268	Nap1	7167.41	-1.18283	0.123921	-9.54504	1.36057e-21	2.02294e-20	-0.443156	0.123925	-3.57601	0.000348885	0.00378269
FBgn0015269	Nf1	222.212	-0.690752	0.264503	-2.61151	0.00901425	0.0216014	-0.188392	0.265949	-0.708376	0.478712	0.747029
FBgn0015270	Orc2	42.1762	1.00963	0.421671	2.39436	0.0166493	0.0372282	0.0999418	0.450287	0.221951	0.824352	0.941146
FBgn0015271	Orc5	43.3791	0.815649	0.397682	2.05101	0.0402662	0.0805344	-0.00558411	0.42608	-0.0131058	0.989543	0.997092
FBgn0015277	Pi3K59F	814.528	-0.784373	0.15622	-5.02095	5.14175e-07	2.52663e-06	0.36728	0.155059	2.36865	0.0178529	0.0873838
FBgn0015278	Pi3K68D	1660.05	-0.0536602	0.130728	-0.410473	0.681459	0.767657	0.33128	0.131253	2.52398	0.0116033	0.0620136
FBgn0015279	Pi3K92E	933.582	0.861945	0.131242	6.56762	5.11257e-11	3.85594e-10	0.394214	0.134182	2.93789	0.0033045	0.023151
FBgn0015282	Rpt2	2633.4	0.0882684	0.0967157	0.912659	0.361422	0.476925	0.165394	0.0975436	1.69559	0.0899641	0.283078
FBgn0015283	Rpn10	2418.38	-0.193215	0.114825	-1.6827	0.0924333	0.160915	0.182247	0.115256	1.58123	0.113825	0.331512
FBgn0015286	Rala	3179.76	0.590941	0.114258	5.17198	2.31622e-07	1.18818e-06	0.354283	0.115039	3.07969	0.00207219	0.0159264
FBgn0015288	RpL22	18631.8	-1.22181	0.109066	-11.2024	3.96651e-29	8.77106e-28	-0.315016	0.109031	-2.88922	0.00386194	0.0263029
FBgn0015295	Shark	532.363	0.0855324	0.154082	0.555111	0.578819	0.680736	-0.00881788	0.157374	-0.0560314	0.955317	0.988936
FBgn0015296	Shc	517.708	1.15025	0.156141	7.36676	1.7482e-13	1.60362e-12	0.366483	0.161735	2.26595	0.0234542	0.107527
FBgn0015298	Srp19	840.616	-0.750604	0.131742	-5.69752	1.21559e-08	7.18229e-08	-0.503208	0.13347	-3.7702	0.000163117	0.00200071
FBgn0015299	Ssb-c31a	453.041	-0.00670725	0.194115	-0.0345529	0.972436	0.98249	-0.0914005	0.197224	-0.463435	0.643053	0.849369
FBgn0015300	Ssl	0	NA	NA	NA	NA	NA	NA	NA	NA	NA	NA
FBgn0015316	Try29F	796.184	-3.94586	0.495461	-7.96401	1.66546e-15	1.76804e-14	-2.40749	0.493212	-4.88125	1.05417e-06	2.69737e-05
FBgn0015320	Ubc2	833.573	0.895527	0.133879	6.68906	2.24612e-11	1.74469e-10	0.227964	0.137553	1.65729	0.0974618	0.29996
FBgn0015321	Ubc4	1090.95	-0.187035	0.122721	-1.52406	0.127493	0.209359	-0.0305959	0.124067	-0.246607	0.805213	0.931591
FBgn0015331	abs	186.213	0.038058	0.256514	0.148366	0.882054	0.9204	0.165745	0.260642	0.635908	0.524836	0.776608
FBgn0015336	CG15865	1749.64	-0.852679	0.147821	-5.76832	8.00636e-09	4.83499e-08	0.865431	0.146419	5.91066	3.4074e-09	1.61e-07
FBgn0015338	CG5861	1254.32	-0.575917	0.121247	-4.74995	2.03469e-06	9.11882e-06	-0.535064	0.122958	-4.3516	1.3515e-05	0.000242221
FBgn0015351	CG14906	1070.6	4.59335	0.191444	23.9932	3.2785e-127	7.09865e-125	1.23032	0.202046	6.08932	1.13389e-09	6.04453e-08
FBgn0015359	CG2034	211.813	0.665506	0.202945	3.27925	0.00104085	0.00305321	-0.146915	0.214698	-0.684285	0.493795	0.757695
FBgn0015360	oxt	540.734	0.0665023	0.13684	0.485987	0.626976	0.722013	0.0944383	0.139912	0.674986	0.499685	0.760686
FBgn0015371	chn	77.5611	0.0036776	0.365894	0.010051	0.991981	0.994948	0.0840369	0.373995	0.224701	0.822212	0.939339
FBgn0015372	RabX1	538.034	1.3895	0.160883	8.6367	5.78599e-18	7.06624e-17	0.43465	0.166732	2.60687	0.00913732	0.051238
FBgn0015376	cutlet	187.488	3.17997	0.288773	11.012	3.3449e-28	6.99467e-27	0.314052	0.318451	0.986184	0.324043	0.614816
FBgn0015379	dod	328.279	-0.220806	0.167189	-1.32069	0.186604	0.285034	-0.230388	0.171905	-1.3402	0.18018	0.441999
FBgn0015380	drl	294.722	-0.857797	0.206734	-4.14927	3.33541e-05	0.000125871	-0.273058	0.207647	-1.31501	0.188505	0.452151
FBgn0015381	dsf	0	NA	NA	NA	NA	NA	NA	NA	NA	NA	NA
FBgn0015391	glu	113.904	1.10131	0.304745	3.61387	0.000301658	0.000971532	0.206111	0.319138	0.645837	0.518385	0.772422
FBgn0015393	hoip	1435.42	-0.259211	0.138126	-1.87663	0.0605692	0.113844	-0.945924	0.14101	-6.70821	1.97027e-11	1.59075e-09
FBgn0015396	jumu	60.6922	0.460883	0.418373	1.10161	0.270632	0.382365	0.237068	0.429826	0.551545	0.58126	0.812421
FBgn0015399	kek1	2.22559	-0.378054	1.67859	-0.225221	0.821808	0.876074	0.59054	1.68288	0.35091	0.725656	NA
FBgn0015400	kek2	6.28684	-1.99471	1.16796	-1.70786	0.087662	0.154103	-0.583453	1.11881	-0.521494	0.602022	NA
FBgn0015402	ksr	321.241	0.020244	0.163545	0.123783	0.901487	0.935864	-0.265016	0.170182	-1.55725	0.119411	0.341714
FBgn0015477	Rme-8	1648.46	0.236174	0.140911	1.67605	0.0937289	0.162707	0.502506	0.141539	3.55029	0.000384811	0.00411439
FBgn0015509	Cul1	1574.8	0.756157	0.115026	6.57377	4.90562e-11	3.70794e-10	0.333803	0.116948	2.85429	0.00431335	0.028536
FBgn0015513	mbc	2291.95	-0.18791	0.147687	-1.27235	0.203248	0.304814	-0.0830553	0.148325	-0.559955	0.57551	0.809697
FBgn0015519	nAChRalpha3	0.535917	2.2354	4.79337	0.466351	0.640964	NA	1.34486	4.93195	0.272683	0.785097	NA
FBgn0015520	nonA-l	104.925	0.195198	0.295249	0.66113	0.508529	0.617712	-0.0669831	0.305725	-0.219096	0.826575	0.941753
FBgn0015521	RpS21	15299.4	-1.32453	0.0910365	-14.5494	5.89271e-48	2.74632e-46	-0.615124	0.0910636	-6.75488	1.42955e-11	1.17704e-09
FBgn0015522	olf186-M	121.242	-1.03043	0.254983	-4.04119	5.31812e-05	0.000194823	0.290898	0.247648	1.17465	0.240136	0.522494
FBgn0015524	otp	0.530039	-0.8218	4.00016	-0.205442	0.837227	NA	-0.303338	4.00656	-0.0757104	0.939649	NA
FBgn0015527	peng	1193.46	0.0529316	0.154236	0.343187	0.731458	0.809417	-0.285057	0.156226	-1.82464	0.0680559	0.23319
FBgn0015544	spag	337.669	-0.616548	0.176405	-3.49508	0.000473916	0.00147955	0.194445	0.175997	1.10482	0.269238	0.555502
FBgn0015546	spel1	114.743	0.163279	0.287411	0.568103	0.569965	0.672912	0.495511	0.291209	1.70157	0.0888368	0.280261
FBgn0015550	tap	41.1137	-0.692896	0.415112	-1.66918	0.0950817	0.164178	0.296544	0.409467	0.72422	0.468931	0.739875
FBgn0015553	tos	30.1661	0.150665	0.584011	0.257983	0.79642	0.858185	-0.0333378	0.600897	-0.05548	0.955756	0.988936
FBgn0015558	tty	7.13857	1.37907	0.984435	1.40087	0.161253	0.25331	0.496205	1.03836	0.477873	0.632741	NA
FBgn0015561	unpg	0.11735	0.645466	4.99681	0.129176	0.897219	NA	0	4.99745	0	1	NA
FBgn0015568	alpha-Est1	1457.79	-1.13517	0.156868	-7.23646	4.60556e-13	4.05984e-12	0.250338	0.155754	1.60726	0.107997	0.320954
FBgn0015569	alpha-Est10	732.216	0.23578	0.181598	1.29836	0.194165	0.294506	-0.178454	0.184483	-0.967322	0.333383	0.622527
FBgn0015570	alpha-Est2	157.307	0.341136	0.252147	1.35293	0.176079	0.272033	-0.80118	0.270076	-2.9665	0.00301212	0.0214275
FBgn0015571	alpha-Est3	1822.71	-0.0292858	0.111328	-0.263058	0.792506	0.855208	0.129555	0.112292	1.15373	0.248611	0.532025
FBgn0015572	alpha-Est4	276.504	-1.1765	0.187153	-6.28632	3.25072e-10	2.27814e-09	-0.0913171	0.184608	-0.494655	0.620844	0.836076
FBgn0015574	alpha-Est6	1.05182	3.81097	3.47349	1.09716	0.272572	NA	0	3.73029	0	1	NA
FBgn0015575	alpha-Est7	849.192	-0.396062	0.221671	-1.78671	0.0739843	0.134122	0.406089	0.221574	1.83275	0.0668401	0.230736
FBgn0015576	alpha-Est8	637.628	0.0938019	0.200279	0.468355	0.639531	0.733139	0.575366	0.200915	2.86372	0.00418694	0.0278995
FBgn0015577	alpha-Est9	1643.26	1.05228	0.116552	9.02842	1.74168e-19	2.32964e-18	0.126646	0.119263	1.0619	0.288281	0.576561
FBgn0015582	dare	626.989	0.163834	0.163693	1.00086	0.316894	0.431705	-0.0974944	0.166925	-0.584062	0.559179	0.800918
FBgn0015583	Acp29AB	0	NA	NA	NA	NA	NA	NA	NA	NA	NA	NA
FBgn0015584	Acp53Ea	0.196233	-2.22791	4.99472	-0.446054	0.655558	NA	-1.49472	4.99472	-0.299259	0.764742	NA
FBgn0015585	Acp63F	3.14703	1.64719	1.49153	1.10436	0.269436	0.380935	0.945445	1.53611	0.615481	0.538237	NA
FBgn0015586	Acp76A	0	NA	NA	NA	NA	NA	NA	NA	NA	NA	NA
FBgn0015589	Apc	1385.85	0.736443	0.147476	4.99364	5.92533e-07	2.87766e-06	0.625722	0.148675	4.20866	2.56895e-05	0.000421369
FBgn0015591	AstA	863.745	-1.26658	0.12551	-10.0914	6.02835e-24	1.03729e-22	0.403897	0.121957	3.3118	0.000926993	0.00848061
FBgn0015600	toc	419.976	-0.23906	0.188312	-1.26949	0.204266	0.305854	0.207514	0.189351	1.09592	0.273114	0.560518
FBgn0015602	BEAF-32	374.054	0.200856	0.213773	0.939577	0.347435	0.462816	0.103045	0.217036	0.474784	0.634941	0.843913
FBgn0015609	CadN	6.77257	-1.65827	0.989824	-1.67532	0.0938719	0.162819	-0.706186	0.969255	-0.728587	0.466254	NA
FBgn0015614	CanB2	825.635	-0.0721921	0.15002	-0.481217	0.630362	0.725269	0.124007	0.151598	0.817996	0.41336	0.693131
FBgn0015615	SMC3	529.371	0.263977	0.156446	1.68734	0.0915374	0.159729	0.0078441	0.160322	0.0489272	0.960977	0.989375
FBgn0015618	Cdk8	112.119	0.224697	0.2629	0.854688	0.392724	0.507975	0.0522367	0.272732	0.191531	0.848109	0.948988
FBgn0015621	Clp	167.635	0.885695	0.229428	3.86044	0.000113183	0.000394337	-0.191609	0.245006	-0.78206	0.434179	0.711595
FBgn0015622	Cnx99A	4406.65	-0.986119	0.145177	-6.79255	1.10169e-11	8.80762e-11	-0.442913	0.145289	-3.0485	0.00229987	0.0173415
FBgn0015623	Cpr	9868.79	-0.876341	0.139943	-6.26215	3.7971e-10	2.63264e-09	0.0992719	0.139879	0.709701	0.47789	0.746521
FBgn0015625	CycB3	19.3514	0.33006	0.715727	0.461153	0.644689	0.737669	-0.646119	0.760066	-0.850083	0.395279	NA
FBgn0015663	Dot	669.896	-0.31108	0.13438	-2.31493	0.0206166	0.0448542	0.251021	0.135114	1.85785	0.0631909	0.22185
FBgn0015664	Dref	659.252	0.516542	0.12852	4.01917	5.84036e-05	0.000212234	0.356918	0.131725	2.70956	0.00673721	0.040249
FBgn0015714	Cyp6a17	1135.6	1.53106	0.179497	8.52974	1.46676e-17	1.74417e-16	0.501808	0.182083	2.75593	0.00585247	0.0363946
FBgn0015721	ktub	40.2402	-0.858349	0.457156	-1.87758	0.0604381	0.113689	-0.00717261	0.454713	-0.0157739	0.987415	0.997092
FBgn0015737	Hmu	2193.04	0.18424	0.0949387	1.94062	0.0523042	0.10048	0.0106242	0.0963604	0.110255	0.912207	0.97222
FBgn0015754	Lis-1	2278.63	1.02207	0.102822	9.94019	2.78286e-23	4.59083e-22	0.295487	0.104585	2.82533	0.00472318	0.0308547
FBgn0015756	RpL9	31187.7	-1.13166	0.131911	-8.57895	9.57402e-18	1.15299e-16	-0.47992	0.131921	-3.63793	0.000274833	0.00310532
FBgn0015765	p38a	894.989	0.196487	0.139403	1.40949	0.158689	0.250077	0.203503	0.141245	1.44078	0.149646	0.392338
FBgn0015766	Msr-110	380.726	-1.07886	0.186483	-5.78531	7.23789e-09	4.39903e-08	-0.478744	0.187194	-2.55747	0.0105435	0.0574349
FBgn0015770	MstProx	0	NA	NA	NA	NA	NA	NA	NA	NA	NA	NA
FBgn0015772	Nak	1336.24	-0.268374	0.134948	-1.98871	0.0467329	0.0913303	0.281299	0.135307	2.07897	0.0376203	0.152017
FBgn0015773	NetA	439.815	-0.01867	0.169312	-0.11027	0.912195	0.943047	-0.384934	0.174396	-2.20723	0.0272977	0.120524
FBgn0015774	NetB	83.79	-1.17209	0.295902	-3.96108	7.46131e-05	0.000266662	-0.457912	0.295245	-1.55096	0.120912	0.344084
FBgn0015776	nrv1	3095.99	-0.229049	0.136515	-1.67783	0.0933799	0.162263	-0.146749	0.137036	-1.07088	0.284225	0.572165
FBgn0015777	nrv2	97.4768	-0.443032	0.286105	-1.5485	0.121503	0.200836	0.125282	0.288104	0.434849	0.663672	0.862427
FBgn0015778	rin	3484.91	0.700064	0.114349	6.12219	9.22977e-10	6.17278e-09	0.164642	0.115301	1.42794	0.15331	0.398415
FBgn0015781	P5cr	691.229	-0.942751	0.170434	-5.53148	3.17543e-08	1.78583e-07	-0.302616	0.17072	-1.77258	0.0762978	0.252887
FBgn0015789	Rab10	4022.83	0.152247	0.0931914	1.6337	0.102321	0.174396	0.306667	0.0936752	3.27373	0.00106138	0.00948061
FBgn0015790	Rab11	6532.46	0.000458669	0.0979989	0.00468035	0.996266	0.998023	0.207273	0.0982621	2.10939	0.0349106	0.144078
FBgn0015791	Rab14	661.83	0.6023	0.13717	4.39091	1.12875e-05	4.58836e-05	0.708227	0.139202	5.08778	3.62283e-07	1.04577e-05
FBgn0015793	Rab19	279.683	0.305479	0.230972	1.32258	0.185975	0.284282	0.284217	0.234631	1.21134	0.225766	0.503891
FBgn0015794	Rab18	1279.83	-0.101827	0.107799	-0.944604	0.344861	0.460331	0.365641	0.108422	3.37239	0.00074518	0.00702598
FBgn0015795	Rab7	4662.12	-0.223988	0.0875723	-2.55775	0.0105351	0.0247494	0.55198	0.0875099	6.30763	2.83339e-10	1.79867e-08
FBgn0015797	Rab6	2872.24	0.628461	0.112	5.61127	2.00849e-08	1.15647e-07	0.179708	0.113139	1.58837	0.112202	0.328315
FBgn0015799	Rbf	813.521	0.662223	0.137059	4.83168	1.35389e-06	6.24529e-06	-0.15595	0.141637	-1.10105	0.270874	0.557571
FBgn0015801	Reg-5	14.324	-2.36363	0.741067	-3.1895	0.00142518	0.00406919	-0.96341	0.703695	-1.36907	0.170976	NA
FBgn0015803	RtGEF	869.211	0.589407	0.14008	4.20764	2.58055e-05	9.91851e-05	0.449361	0.142121	3.16182	0.00156786	0.0128204
FBgn0015805	HDAC1	867.212	0.529807	0.162977	3.2508	0.00115081	0.00334836	-0.0297616	0.165945	-0.179347	0.857666	0.952625
FBgn0015808	ScpX	2445.75	-1.42693	0.143448	-9.94738	2.58908e-23	4.29846e-22	-0.322013	0.14299	-2.252	0.0243225	0.110649
FBgn0015818	Spx	221.98	0.55939	0.20506	2.72793	0.00637328	0.0158767	-0.185725	0.215551	-0.861629	0.388892	0.670403
FBgn0015828	TfIIEalpha	365.232	0.709022	0.161892	4.3796	1.18898e-05	4.81195e-05	0.10003	0.168984	0.591949	0.553884	0.79834
FBgn0015829	TfIIEbeta	222.908	0.138548	0.188693	0.734253	0.462794	0.576249	0.205799	0.193716	1.06238	0.288065	0.576268
FBgn0015831	Rtnl2	0.808561	1.64907	3.4692	0.475346	0.634541	NA	2.93829	3.42094	0.858913	0.390389	NA
FBgn0015834	eIF3i	4781.97	-0.52338	0.0887376	-5.89806	3.67801e-09	2.3167e-08	-0.321083	0.0891967	-3.59971	0.000318566	0.00350887
FBgn0015838	Vang	201.166	0.220639	0.192964	1.14342	0.252865	0.362536	-0.228002	0.202952	-1.12343	0.261254	0.547252
FBgn0015872	Drip	1181.72	-0.775777	0.167864	-4.62147	3.81039e-06	1.6518e-05	-0.213847	0.168246	-1.27104	0.203714	0.474805
FBgn0015903	apt	854.133	-0.174047	0.165015	-1.05474	0.291545	0.404597	0.015377	0.166253	0.0924913	0.926308	0.977312
FBgn0015904	ara	0	NA	NA	NA	NA	NA	NA	NA	NA	NA	NA
FBgn0015905	ast	313.994	0.340698	0.186423	1.82755	0.0676171	0.124733	0.177957	0.191234	0.930571	0.352075	0.640389
FBgn0015919	caup	0	NA	NA	NA	NA	NA	NA	NA	NA	NA	NA
FBgn0015924	crq	1748.94	-0.28991	0.127741	-2.26951	0.0232373	0.0498463	0.407633	0.12782	3.18912	0.00142707	0.0119527
FBgn0015925	csul	261.322	0.828012	0.210207	3.93903	8.18122e-05	0.000290891	0.284069	0.217201	1.30786	0.190921	0.456366
FBgn0015926	dah	10.0889	0.401879	0.942275	0.426498	0.669745	0.758076	-1.07192	1.03557	-1.03511	0.300619	NA
FBgn0015929	dpa	214.691	1.53378	0.209084	7.33572	2.20541e-13	1.99832e-12	0.30524	0.222719	1.37052	0.170525	0.427908
FBgn0015946	grim	1.0744	1.22027	2.88272	0.423304	0.672073	NA	0.907946	2.97237	0.305462	0.760014	NA
FBgn0015949	hrg	1448.02	-0.268209	0.109515	-2.44905	0.0143233	0.0326094	0.233186	0.10999	2.12007	0.0340003	0.141373
FBgn0016013	Faa	7.06784	0.0204063	0.961725	0.0212184	0.983071	0.98945	0.13196	0.991536	0.133086	0.894125	NA
FBgn0016031	lama	3290.89	2.65282	0.156394	16.9624	1.55745e-64	1.08635e-62	0.338072	0.158706	2.13018	0.0331571	0.138979
FBgn0016032	lbm	65.5613	-0.591157	0.365177	-1.61882	0.105486	0.178815	0.505514	0.360149	1.40363	0.16043	0.409262
FBgn0016034	mael	61.1156	0.106719	0.380428	0.280523	0.779077	0.845634	0.860811	0.380323	2.26337	0.023613	0.108131
FBgn0016036	mei-P22	1.58325	1.98816	2.25841	0.880334	0.378679	0.493865	1.49648	2.34614	0.637845	0.523574	NA
FBgn0016038	Vsp37A	604.427	-0.189996	0.158509	-1.19864	0.230668	0.33732	-0.032491	0.16056	-0.20236	0.839635	0.946862
FBgn0016041	Tom40	2065.31	-0.0103034	0.117861	-0.0874202	0.930338	0.954868	-0.703897	0.120005	-5.86559	4.47547e-09	2.04495e-07
FBgn0016047	nompA	0.693806	-1.75903	3.6365	-0.483716	0.628587	NA	-1.0397	3.63178	-0.286278	0.774665	NA
FBgn0016053	pgc	10.5897	0.511685	0.95994	0.533039	0.594007	0.694668	-1.36849	1.10129	-1.24263	0.214006	NA
FBgn0016054	phr6-4	41.7045	0.708135	0.425192	1.66545	0.095824	0.165184	0.156038	0.448399	0.347988	0.727849	0.897146
FBgn0016059	Sema1b	286.474	-0.425439	0.206031	-2.06493	0.0389297	0.0781073	-0.00319718	0.207746	-0.0153898	0.987721	0.997092
FBgn0016061	side	9.23269	-0.827732	0.869013	-0.952496	0.340845	0.456025	-0.695983	0.88708	-0.784578	0.432701	NA
FBgn0016070	smg	398.039	-0.104327	0.167631	-0.622361	0.533705	0.640975	-0.107853	0.171215	-0.629927	0.528742	0.7798
FBgn0016075	vkg	100.649	-0.846269	0.339218	-2.49477	0.0126039	0.0290965	-0.636402	0.345273	-1.84319	0.0653019	0.227313
FBgn0016076	vri	3265.41	2.06043	0.189957	10.8468	2.06463e-27	4.15042e-26	0.560294	0.191106	2.93185	0.00336946	0.0235432
FBgn0016078	wun	2082.15	-0.944097	0.129289	-7.3022	2.8309e-13	2.53197e-12	-0.167692	0.129046	-1.29948	0.19378	0.460571
FBgn0016080	xmas-1	32.3025	0.723931	0.468719	1.54449	0.12247	0.202325	0.215672	0.493259	0.43724	0.661937	0.861901
FBgn0016081	fry	3160.22	0.887423	0.187586	4.73074	2.23701e-06	9.9825e-06	0.384345	0.188218	2.04202	0.0411492	0.162377
FBgn0016119	ATPsynCF6	3912.38	-0.89222	0.129518	-6.88876	5.62798e-12	4.62384e-11	-0.163662	0.129526	-1.26354	0.206394	0.478098
FBgn0016120	ATPsynD	4054.63	-0.717309	0.132592	-5.40989	6.30628e-08	3.44229e-07	-0.000721135	0.132608	-0.0054381	0.995661	0.998895
FBgn0016122	Acer	94.6933	-0.886497	0.285652	-3.10342	0.00191298	0.00534021	-0.230624	0.288515	-0.799349	0.424088	0.703146
FBgn0016123	Alp4	146.453	-0.705583	0.347746	-2.02902	0.0424567	0.0841123	-0.145595	0.349058	-0.417108	0.6766	0.869124
FBgn0016126	CaMKI	740.175	-0.315003	0.134691	-2.33871	0.0193504	0.0423921	0.215349	0.135306	1.59157	0.11148	0.327355
FBgn0016131	Cdk4	219.103	0.0837193	0.251264	0.333193	0.738989	0.814541	0.549552	0.253059	2.17164	0.0298832	0.128628
FBgn0016641	PTP-ER	206.188	-0.79702	0.243098	-3.2786	0.00104324	0.00305849	-0.176936	0.244023	-0.725078	0.468404	0.739875
FBgn0016650	Lgr1	15.2907	-1.05375	0.67486	-1.56144	0.11842	0.196636	-0.467732	0.6816	-0.686227	0.49257	NA
FBgn0016660	H15	0.184775	0	4.99745	0	1	NA	1.35386	4.99376	0.27111	0.786306	NA
FBgn0016672	Ipp	568.873	-0.0575291	0.175115	-0.328521	0.742518	0.817309	0.00278848	0.177349	0.0157231	0.987455	0.997092
FBgn0016675	Lectin-galC1	19.1313	-1.92755	0.592117	-3.25535	0.00113252	0.00329976	-1.25553	0.592123	-2.12038	0.0339738	NA
FBgn0016684	NaPi-T	62.2357	-0.606214	0.674372	-0.898931	0.368689	0.484274	1.0955	0.668264	1.63932	0.101146	0.307429
FBgn0016685	Nlp	2919.55	-0.0855974	0.114459	-0.747846	0.454553	0.568471	-0.909536	0.1163	-7.82058	5.25807e-15	7.53899e-13
FBgn0016687	Nurf-38	6454.02	-0.789684	0.104831	-7.53294	4.96089e-14	4.73883e-13	-0.342662	0.105005	-3.2633	0.00110122	0.0097631
FBgn0016691	ATPsynO	5541.07	-0.759705	0.118213	-6.42657	1.30515e-10	9.45253e-10	-0.0148979	0.118211	-0.126028	0.899709	0.970072
FBgn0016693	Past1	5242.63	1.1108	0.109466	10.1474	3.40203e-24	5.93244e-23	0.0552499	0.110471	0.500132	0.616982	0.834145
FBgn0016694	Pdp1	5329.73	-0.307289	0.0846959	-3.62815	0.000285462	0.000923377	-0.503311	0.085444	-5.89053	3.84962e-09	1.77852e-07
FBgn0016696	Pitslre	1556.23	-0.0335611	0.141551	-0.237095	0.812583	0.869919	-0.2344	0.142885	-1.64049	0.100904	0.307145
FBgn0016697	Prosalpha5	1957.69	0.137206	0.111219	1.23366	0.21733	0.321406	-0.0162747	0.112561	-0.144585	0.885038	0.96454
FBgn0016698	Ptpa	215.138	0.277612	0.224204	1.23821	0.215638	0.319476	-0.115002	0.231808	-0.496108	0.619818	0.835669
FBgn0016701	Rab4	814.964	-0.269658	0.136387	-1.97716	0.0480238	0.0934491	0.0834245	0.137494	0.60675	0.544017	0.791943
FBgn0016715	Reg-2	465.536	-1.95439	0.186098	-10.5019	8.46315e-26	1.60214e-24	-0.0675919	0.179457	-0.376647	0.706436	0.88637
FBgn0016726	RpL29	11990.6	-1.46923	0.10684	-13.7516	4.97845e-43	2.02114e-41	-0.626127	0.106815	-5.86179	4.57911e-09	2.08087e-07
FBgn0016754	sba	750.505	-0.328429	0.15997	-2.05306	0.0400667	0.0801719	0.464096	0.159874	2.90289	0.00369735	0.0253899
FBgn0016756	Usp47	2912.81	-0.402514	0.139411	-2.88725	0.00388627	0.0101687	0.0809487	0.139633	0.579723	0.562101	0.802753
FBgn0016762	angel	114.577	-0.378573	0.292707	-1.29335	0.195889	0.296648	0.271386	0.293677	0.924095	0.355437	0.643269
FBgn0016794	dos	341.299	0.223738	0.174166	1.28462	0.198924	0.300314	0.288352	0.177661	1.62305	0.104579	0.314077
FBgn0016797	fz2	1082.72	-0.0520062	0.121873	-0.426722	0.669582	0.758057	0.0705446	0.123331	0.571992	0.567328	0.806316
FBgn0016917	Stat92E	5753.78	0.0753714	0.0965918	0.780309	0.435209	0.549323	0.201331	0.0969465	2.07672	0.0378271	0.152482
FBgn0016919	nompB	0	NA	NA	NA	NA	NA	NA	NA	NA	NA	NA
FBgn0016920	nompC	15.4003	2.62829	0.810208	3.24397	0.00117877	0.00342207	-0.154479	0.931734	-0.165797	0.868316	NA
FBgn0016926	Pino	3109.44	-0.951409	0.160291	-5.93553	2.92902e-09	1.86414e-08	0.163348	0.15999	1.02099	0.307259	0.59561
FBgn0016930	Dyrk2	738.248	-0.301996	0.136363	-2.21465	0.0267839	0.0565209	0.00763588	0.137714	0.0554473	0.955782	0.988936
FBgn0016970	l(2)k10201	102.603	-0.0696924	0.292436	-0.238317	0.811635	0.869173	0.0963193	0.298663	0.322501	0.747073	0.906614
FBgn0016974	swaPsi	3.00939	1.18272	1.52118	0.777503	0.436862	0.551142	-2.12287	2.06226	-1.02939	0.303296	NA
FBgn0016976	stnA	75.3627	0.730837	0.350102	2.0875	0.0368429	0.0744234	0.359143	0.362435	0.990919	0.321725	0.612515
FBgn0016977	spen	1842.38	-0.0119466	0.228442	-0.0522959	0.958293	0.972516	0.335153	0.228758	1.4651	0.142894	0.381846
FBgn0016978	snRNP-U1-70K	787.223	0.513944	0.139443	3.68568	0.000228088	0.000753743	-0.0858143	0.143329	-0.598723	0.549358	0.795493
FBgn0016983	smid	1081.33	0.320776	0.122286	2.62316	0.00871194	0.0209542	0.081826	0.124635	0.656525	0.511486	0.767818
FBgn0016984	sktl	2043.63	0.270321	0.102509	2.63704	0.00836322	0.020242	0.292529	0.103566	2.82456	0.00473453	0.0309045
FBgn0017414	cag	69.8118	-0.173875	0.407982	-0.426182	0.669975	0.758223	-0.202461	0.417315	-0.485152	0.627569	0.839972
FBgn0017418	ari-1	1075.72	0.173698	0.152489	1.13908	0.254669	0.364425	0.24948	0.153545	1.6248	0.104205	0.31352
FBgn0017429	CG5989	415.789	-0.00698205	0.149865	-0.046589	0.962841	0.975893	-0.107543	0.154297	-0.696986	0.485811	0.75275
FBgn0017430	Nelf-E	144.345	0.317406	0.255782	1.24092	0.214634	0.318216	0.0332289	0.26444	0.125657	0.900003	0.970072
FBgn0017448	CG2187	10.3234	-2.74898	1.21615	-2.2604	0.0237967	0.0508719	-0.367868	1.14154	-0.322256	0.747259	NA
FBgn0017456	Ubc84D	4.45327	-0.105417	1.45555	-0.0724241	0.942264	0.962124	-1.22375	1.57601	-0.776486	0.437462	NA
FBgn0017457	U2af38	478.962	0.0915723	0.155053	0.590588	0.554796	0.658536	-0.158636	0.159514	-0.9945	0.319979	0.610303
FBgn0017482	T3dh	839.823	-0.907561	0.128573	-7.05871	1.68052e-12	1.43161e-11	0.0141831	0.127899	0.110894	0.911701	0.97222
FBgn0017545	RpS3A	50224.9	-0.901843	0.126491	-7.12972	1.00571e-12	8.68857e-12	-0.399548	0.126505	-3.15836	0.00158661	0.0129102
FBgn0017550	Rga	1309.88	0.166945	0.158454	1.05359	0.292071	0.405114	0.236157	0.159445	1.48112	0.138574	0.373303
FBgn0017551	Rca1	51.3155	-0.000424641	0.378291	-0.00112253	0.999104	1	-0.143593	0.393193	-0.365196	0.714965	0.891375
FBgn0017556	Prosalpha4T2	0	NA	NA	NA	NA	NA	NA	NA	NA	NA	NA
FBgn0017558	Pdk	3111.99	-2.50217	0.243715	-10.2668	9.94759e-25	1.79488e-23	-0.449975	0.24266	-1.85434	0.0636904	0.223261
FBgn0017561	Ork1	533.934	-0.156563	0.191614	-0.817071	0.413888	0.528834	-0.015841	0.193676	-0.081791	0.934813	0.981801
FBgn0017566	ND-75	5641.33	-0.728221	0.123172	-5.91222	3.37523e-09	2.13116e-08	-0.0154297	0.123189	-0.125252	0.900324	0.970072
FBgn0017567	ND-23	1748.81	-0.336802	0.15134	-2.22547	0.0260495	0.055229	-0.169382	0.15209	-1.11369	0.26541	0.551382
FBgn0017572	Mo25	1748.84	-0.0324257	0.105773	-0.306559	0.759179	0.830804	0.115035	0.106784	1.07727	0.281359	0.56888
FBgn0017577	Mcm5	117.035	1.57279	0.283073	5.55611	2.7585e-08	1.56491e-07	0.0762336	0.305189	0.249792	0.802749	0.930405
FBgn0017578	Max	529.093	-0.569793	0.184618	-3.08634	0.00202638	0.00562355	-0.22382	0.186072	-1.20287	0.229028	0.508476
FBgn0017579	RpL14	26149.5	-1.14572	0.127682	-8.97327	2.87835e-19	3.79628e-18	-0.509289	0.127694	-3.98836	6.65307e-05	0.000934576
FBgn0017581	Lk6	8829.38	-0.252222	0.10038	-2.51268	0.0119819	0.0277778	0.0781721	0.100548	0.777461	0.436887	0.714062
FBgn0017590	klg	2.31855	0.617484	1.60716	0.384208	0.700824	0.784624	0.341572	1.68622	0.202566	0.839474	NA
FBgn0019624	COX5A	9040.14	-1.0573	0.127851	-8.2698	1.34179e-16	1.52573e-15	-0.173862	0.127807	-1.36036	0.173718	0.432914
FBgn0019637	Atu	471.261	0.654019	0.143089	4.57072	4.86051e-06	2.07455e-05	0.23766	0.148238	1.60323	0.108884	0.321891
FBgn0019643	Dat	5865.45	-0.479566	0.16721	-2.86805	0.00413007	0.010739	0.470947	0.167137	2.81774	0.00483629	0.0313159
FBgn0019644	ATPsynB	7785.2	-0.897041	0.150591	-5.95682	2.57188e-09	1.64287e-08	-0.151286	0.150588	-1.00464	0.315071	0.604831
FBgn0019650	toy	3.88861	0.975234	1.30292	0.748499	0.454159	0.568136	0.897052	1.34174	0.668571	0.503769	NA
FBgn0019662	qm	874.993	0.647928	0.13895	4.66304	3.11578e-06	1.36923e-05	0.684948	0.140358	4.88001	1.06083e-06	2.70609e-05
FBgn0019686	lok	203.605	-0.138497	0.209569	-0.660864	0.508699	0.617846	0.120559	0.213286	0.565243	0.571908	0.808567
FBgn0019809	gcm2	0.233853	1.64172	4.89224	0.335576	0.737191	NA	0	4.99745	0	1	NA
FBgn0019828	dj	0.35	2.22366	4.85681	0.457844	0.647064	NA	0	4.99745	0	1	NA
FBgn0019830	colt	2565.14	-1.33653	0.121203	-11.0272	2.82442e-28	5.93014e-27	-0.271718	0.12074	-2.25044	0.0244211	0.110915
FBgn0019890	Smg5	2702.54	0.809846	0.148275	5.46178	4.7139e-08	2.6004e-07	0.25799	0.149248	1.7286	0.0838814	0.270237
FBgn0019925	Surf4	3110.54	-1.05195	0.118488	-8.87813	6.79949e-19	8.78945e-18	-0.461257	0.118638	-3.88794	0.000101098	0.00133027
FBgn0019928	Ser8	1984.73	-6.35453	0.243055	-26.1444	1.14074e-150	4.08819e-148	-0.296716	0.202765	-1.46335	0.143371	0.382386
FBgn0019929	Ser7	17.8093	0.31015	0.681875	0.454848	0.649218	0.741244	-0.119745	0.71295	-0.167957	0.866617	NA
FBgn0019932	SamDC	351.52	-0.144427	0.187425	-0.77059	0.44095	0.555052	0.0121933	0.190261	0.0640874	0.948901	0.987233
FBgn0019936	RpS20	18206.5	-1.23146	0.0911859	-13.505	1.46131e-41	5.64585e-40	-0.363891	0.0911527	-3.99211	6.54889e-05	0.00092306
FBgn0019938	RpI1	1135.87	-0.227763	0.153239	-1.48632	0.137193	0.22175	-0.300004	0.154879	-1.93702	0.0527433	0.195286
FBgn0019940	Rh6	0.585486	-2.22557	3.86791	-0.575392	0.565026	NA	0.954696	3.73097	0.255884	0.79804	NA
FBgn0019949	Cdk9	243.313	0.244389	0.18484	1.32216	0.186114	0.284411	0.0309302	0.191586	0.161443	0.871744	0.958158
FBgn0019952	Orct	394.734	-1.2173	0.254388	-4.78522	1.70804e-06	7.76878e-06	0.410539	0.251198	1.63433	0.10219	0.310038
FBgn0019957	ND-42	3327.15	-0.640896	0.119532	-5.36172	8.24348e-08	4.45989e-07	0.0650796	0.119563	0.544312	0.586226	0.815748
FBgn0019960	Mitofilin	3701.83	-0.422754	0.119591	-3.535	0.000407781	0.00128646	-0.00266294	0.119841	-0.0222205	0.982272	0.996532
FBgn0019968	Khc-73	2651.5	0.265708	0.139445	1.90547	0.0567186	0.107628	0.332456	0.140006	2.37458	0.017569	0.0861968
FBgn0019972	Drice	464.335	1.04381	0.151847	6.87409	6.23867e-12	5.09736e-11	0.456892	0.157298	2.90463	0.0036769	0.0252704
FBgn0019982	Gs1l	1021.67	-0.435977	0.178468	-2.44289	0.0145703	0.0331066	-0.0852555	0.17924	-0.47565	0.634324	0.843331
FBgn0019985	mGluR	6.04064	-0.924354	1.09566	-0.843653	0.398863	0.514061	-0.378679	1.10422	-0.342939	0.731644	NA
FBgn0019990	Gcn2	639.348	-0.514643	0.17684	-2.91022	0.00361175	0.00954409	-0.22144	0.178227	-1.24246	0.214066	0.489058
FBgn0020018	Ppox	459.281	0.353956	0.162239	2.18169	0.0291325	0.060879	-0.226423	0.168128	-1.34674	0.178066	0.439014
FBgn0020224	Cbl	730.196	-0.0792709	0.12768	-0.620854	0.534695	0.641656	0.224511	0.129237	1.7372	0.082352	0.266371
FBgn0020235	ATPsyngamma	7309	-0.629552	0.118619	-5.30735	1.11233e-07	5.93147e-07	-0.127428	0.118719	-1.07335	0.283113	0.570617
FBgn0020236	ATPCL	3322.41	0.0488891	0.129246	0.378264	0.705234	0.788203	-0.115144	0.129951	-0.886061	0.375585	0.657411
FBgn0020238	14-3-3epsilon	11922.8	0.502362	0.0962258	5.22066	1.78286e-07	9.2739e-07	0.232637	0.0964799	2.41125	0.0158979	0.0796427
FBgn0020248	stet	6.40283	2.15944	1.13442	1.90356	0.0569673	0.108021	-2.45848	1.79373	-1.37059	0.170502	NA
FBgn0020249	stck	1997.55	0.533192	0.105362	5.06058	4.17987e-07	2.08652e-06	-0.0139614	0.107246	-0.130181	0.896423	0.968892
FBgn0020251	sfl	688.947	0.467689	0.145371	3.21721	0.00129445	0.00373389	-0.0315872	0.1493	-0.211568	0.832444	0.943612
FBgn0020255	Ran	6293.81	0.028715	0.113814	0.252299	0.80081	0.86176	-0.367793	0.11436	-3.21609	0.00129948	0.0110938
FBgn0020257	Ppa	883.434	0.0912025	0.129874	0.702236	0.482532	0.594955	0.329246	0.13118	2.50987	0.0120775	0.0637289
FBgn0020258	ppk	36.8322	-2.17848	0.495155	-4.39959	1.08454e-05	4.42373e-05	-0.685781	0.472057	-1.45275	0.146293	0.387445
FBgn0020261	pcm	691.368	0.200652	0.143479	1.39848	0.161968	0.254242	0.0775049	0.146248	0.529955	0.596143	0.822553
FBgn0020269	mspo	7.2429	-0.517545	1.03454	-0.500265	0.616888	0.713229	1.07393	1.00475	1.06885	0.285138	NA
FBgn0020270	mre11	439.722	1.19452	0.178178	6.70408	2.02676e-11	1.58615e-10	0.496281	0.183555	2.70372	0.00685671	0.0408163
FBgn0020272	mst	237.549	2.22489	0.202102	11.0087	3.46799e-28	7.23751e-27	0.529902	0.218306	2.42733	0.0152104	0.0768904
FBgn0020277	lush	0.11735	0.645466	4.99681	0.129176	0.897219	NA	0	4.99745	0	1	NA
FBgn0020278	loco	1265.41	0.655411	0.145778	4.49597	6.92548e-06	2.89178e-05	0.0749203	0.148053	0.506039	0.61283	0.831504
FBgn0020279	lig	3393.52	0.0802479	0.131672	0.609454	0.542224	0.648583	0.0850624	0.132197	0.64345	0.519932	0.773342
FBgn0020280	laf	0	NA	NA	NA	NA	NA	NA	NA	NA	NA	NA
FBgn0020294	ko	68.7339	-0.941606	0.335475	-2.80678	0.00500393	0.0127747	-0.00555667	0.332277	-0.016723	0.986658	0.997092
FBgn0020299	stumps	215.831	-1.47165	0.201241	-7.31289	2.6146e-13	2.35473e-12	-0.323061	0.197563	-1.63523	0.102	0.309573
FBgn0020300	geko	14.0599	-1.85945	0.684989	-2.71457	0.00663621	0.0164567	-1.35226	0.698099	-1.93707	0.052737	NA
FBgn0020304	drongo	907.554	-0.32286	0.136284	-2.36903	0.017835	0.0394633	0.014968	0.137356	0.108972	0.913224	0.97222
FBgn0020305	dbe	489.026	0.160133	0.173863	0.921028	0.357036	0.472577	-0.200459	0.178197	-1.12493	0.260618	0.547158
FBgn0020306	dom	3923.22	-0.943073	0.182752	-5.1604	2.46428e-07	1.25854e-06	-0.194952	0.182743	-1.06681	0.286057	0.573356
FBgn0020307	dve	1168.86	-0.375775	0.188364	-1.99494	0.0460495	0.0901643	0.0376625	0.188904	0.199374	0.84197	0.947182
FBgn0020309	crol	2326.04	1.05968	0.118091	8.97341	2.87473e-19	3.79628e-18	0.0827947	0.120058	0.689623	0.490431	0.756188
FBgn0020312	CG4050	277.585	-0.171508	0.179146	-0.957365	0.338383	0.453549	-0.316652	0.185323	-1.70865	0.0875161	0.277357
FBgn0020369	Rpt6	3649.84	0.0264755	0.0883495	0.299668	0.76443	0.835495	0.151486	0.0889666	1.70273	0.0886193	0.27987
FBgn0020370	TppII	2731.34	-0.438944	0.115357	-3.80511	0.000141742	0.000484739	0.0719807	0.115607	0.622631	0.533527	0.783612
FBgn0020371	Tim17b2	0.11735	0.645466	4.99681	0.129176	0.897219	NA	0	4.99745	0	1	NA
FBgn0020372	TM4SF	7.69282	-0.815701	0.877906	-0.929144	0.352814	0.468062	-1.53541	0.966643	-1.58839	0.112198	NA
FBgn0020376	Sr-CIII	0.925664	-0.807201	3.5708	-0.226056	0.821158	NA	1.57453	3.36691	0.467649	0.640036	NA
FBgn0020377	Sr-CII	0	NA	NA	NA	NA	NA	NA	NA	NA	NA	NA
FBgn0020378	Sp1	0.326868	-0.813984	4.99154	-0.163073	0.870461	NA	-1.53441	4.99195	-0.307376	0.758557	NA
FBgn0020379	Rfx	136.863	-0.0704502	0.236016	-0.298497	0.765323	0.836032	0.396234	0.238797	1.65929	0.0970577	0.299159
FBgn0020381	Dredd	699.784	0.114243	0.163569	0.698438	0.484903	0.596826	0.0919185	0.165709	0.554697	0.579102	0.811699
FBgn0020385	pug	1710.76	-1.53418	0.156421	-9.80801	1.04002e-22	1.6402e-21	-0.502894	0.155925	-3.22523	0.00125871	0.0108023
FBgn0020386	Pdk1	5339.54	-0.65667	0.245275	-2.67728	0.00742234	0.0182064	-0.126434	0.24533	-0.515362	0.6063	0.827735
FBgn0020388	Gcn5	1860.69	2.55596	0.113113	22.5966	4.68292e-113	8.1116e-111	1.33794	0.115755	11.5584	6.6968e-31	6.18784e-28
FBgn0020389	Papss	858.812	0.91816	0.135241	6.78908	1.12852e-11	9.0013e-11	-0.153874	0.140437	-1.09568	0.273219	0.560594
FBgn0020391	Nrk	68.1667	1.38096	0.336538	4.10343	4.0707e-05	0.000151583	-0.550536	0.38024	-1.44786	0.147655	0.388945
FBgn0020392	Nmt	1328.53	0.543132	0.120595	4.50376	6.67623e-06	2.79557e-05	-0.0952267	0.123409	-0.771632	0.440332	0.717157
FBgn0020399	Mst89B	0.723665	-0.81298	3.75008	-0.21679	0.828372	NA	0.992842	3.60326	0.27554	0.782901	NA
FBgn0020407	asun	132.468	0.493428	0.248102	1.98881	0.046722	0.0913262	0.462019	0.25495	1.81219	0.0699566	0.237956
FBgn0020412	JIL-1	1089.84	0.526054	0.146248	3.59701	0.000321898	0.00103256	0.0237163	0.148468	0.15974	0.873085	0.958673
FBgn0020414	Idgf3	75.4062	-2.03084	0.529675	-3.83413	0.000126009	0.000435088	-0.809039	0.52423	-1.54329	0.12276	0.347087
FBgn0020415	Idgf2	77.0422	-0.921909	0.344382	-2.677	0.00742857	0.0182173	-0.235593	0.345308	-0.682269	0.495069	0.75803
FBgn0020416	Idgf1	28.9558	-1.58946	0.575152	-2.76356	0.00571754	0.0144159	-0.210967	0.558167	-0.377964	0.705457	0.88628
FBgn0020429	GluRIIB	0	NA	NA	NA	NA	NA	NA	NA	NA	NA	NA
FBgn0020440	Fak	587.106	-0.449224	0.138437	-3.24497	0.00117465	0.00341199	-0.0150383	0.139971	-0.107439	0.914441	0.972939
FBgn0020443	eRF3	4254.26	0.157217	0.10371	1.51593	0.129537	0.212146	-0.0575658	0.104395	-0.55142	0.581346	0.812421
FBgn0020445	E23	97.0146	-0.796467	0.300412	-2.65125	0.00801949	0.0195145	0.0500932	0.299163	0.167445	0.86702	0.956248
FBgn0020493	Dad	875.431	1.19078	0.133243	8.93692	4.00171e-19	5.23141e-18	-0.211187	0.13947	-1.51421	0.129972	0.358839
FBgn0020496	CtBP	3449.16	0.389516	0.124412	3.13085	0.00174304	0.00490534	0.121364	0.125102	0.970118	0.331988	0.622365
FBgn0020497	emb	2235.7	0.152461	0.120054	1.26994	0.204108	0.305706	0.292428	0.12075	2.42177	0.0154451	0.0777963
FBgn0020503	CLIP-190	2447.13	-0.0867355	0.12611	-0.687775	0.491595	0.602991	-0.203383	0.126767	-1.60439	0.108628	0.321706
FBgn0020506	Amyrel	67.8405	-0.167133	0.705546	-0.236885	0.812746	0.870004	-1.61558	0.727651	-2.22027	0.0264004	0.117656
FBgn0020508	Ag5r2	10337.1	-2.63306	0.105459	-24.9677	1.37231e-137	3.56561e-135	-0.235086	0.10449	-2.24985	0.0244586	0.110965
FBgn0020509	Acp62F	0.234701	1.64647	4.89189	0.336571	0.73644	NA	0	4.99745	0	1	NA
FBgn0020510	Abi	678.516	0.547524	0.138604	3.95029	7.80573e-05	0.000278206	0.249893	0.141939	1.76057	0.0783113	0.258154
FBgn0020513	ade5	506.085	-0.477282	0.156472	-3.05027	0.00228635	0.00627962	-0.263422	0.158893	-1.65786	0.0973458	0.299811
FBgn0020521	pio	34.4371	-0.515508	0.469064	-1.09901	0.271762	0.383806	-0.285479	0.486188	-0.587178	0.557084	0.799757
FBgn0020545	kraken	3101.79	0.678843	0.142888	4.75087	2.0254e-06	9.08503e-06	0.0381307	0.143878	0.26502	0.790994	0.925573
FBgn0020616	SA	399.979	0.391074	0.153794	2.54285	0.0109954	0.0257144	0.354281	0.15761	2.24783	0.0245872	0.111348
FBgn0020617	Rx	0	NA	NA	NA	NA	NA	NA	NA	NA	NA	NA
FBgn0020618	Rack1	32013.4	-1.16156	0.0933486	-12.4433	1.52151e-35	4.46696e-34	-0.454336	0.0933565	-4.86668	1.13488e-06	2.8599e-05
FBgn0020620	RN-tre	713.685	-0.133652	0.135648	-0.985289	0.324482	0.43945	0.304228	0.13666	2.22617	0.0260025	0.116382
FBgn0020621	Pkn	2831.64	0.606227	0.11264	5.38197	7.36749e-08	4.00263e-07	0.174726	0.113831	1.53497	0.124792	0.350303
FBgn0020622	Pi3K21B	1260.89	2.60985	0.20686	12.6165	1.71199e-36	5.31124e-35	1.08118	0.209345	5.16456	2.41004e-07	7.34134e-06
FBgn0020626	Osbp	2409.68	-0.336647	0.10254	-3.28307	0.00102683	0.0030155	0.297437	0.102687	2.89655	0.00377291	0.0258234
FBgn0020633	Mcm7	167.439	1.53251	0.227767	6.7284	1.7154e-11	1.35164e-10	0.241611	0.244393	0.988614	0.322852	0.613817
FBgn0020637	Lcp65Ag2	0.204461	0	4.99745	0	1	NA	1.4276	4.9887	0.286166	0.774751	NA
FBgn0020638	Lcp65Ag1	0	NA	NA	NA	NA	NA	NA	NA	NA	NA	NA
FBgn0020639	Lcp65Af	0	NA	NA	NA	NA	NA	NA	NA	NA	NA	NA
FBgn0020640	Lcp65Ae	0	NA	NA	NA	NA	NA	NA	NA	NA	NA	NA
FBgn0020641	Lcp65Ad	0	NA	NA	NA	NA	NA	NA	NA	NA	NA	NA
FBgn0020642	Lcp65Ac	0	NA	NA	NA	NA	NA	NA	NA	NA	NA	NA
FBgn0020643	Lcp65Ab2	0	NA	NA	NA	NA	NA	NA	NA	NA	NA	NA
FBgn0020644	Lcp65Ab1	0	NA	NA	NA	NA	NA	NA	NA	NA	NA	NA
FBgn0020645	Lcp65Aa	0	NA	NA	NA	NA	NA	NA	NA	NA	NA	NA
FBgn0020646	Lcp65APsi	0	NA	NA	NA	NA	NA	NA	NA	NA	NA	NA
FBgn0020647	KrT95D	416.525	0.769467	0.168392	4.56949	4.88901e-06	2.08586e-05	-0.230031	0.17702	-1.29946	0.193786	0.460571
FBgn0020653	Trxr-1	8818.79	0.343586	0.11491	2.99003	0.00278947	0.00752815	0.0104786	0.115256	0.0909152	0.92756	0.978026
FBgn0020655	ArfGAP1	1531	-0.690519	0.11164	-6.18525	6.20046e-10	4.21737e-09	-0.223773	0.112229	-1.9939	0.0461625	0.176846
FBgn0020660	eIF4B	3543.71	-0.444527	0.0941809	-4.71993	2.3593e-06	1.04787e-05	0.0195441	0.0944263	0.206978	0.836027	0.945084
FBgn0020762	Atet	1807.06	-2.06957	0.149481	-13.845	1.3639e-43	5.69279e-42	0.505962	0.145857	3.46889	0.000522607	0.00529354
FBgn0020764	Alas	2480.96	-0.305922	0.150879	-2.0276	0.0426009	0.0843497	-0.202427	0.151476	-1.33637	0.18143	0.443162
FBgn0020765	Acp65Aa	0.905296	-2.37045	2.85267	-0.830956	0.405998	NA	-1.66174	2.84612	-0.583861	0.559314	NA
FBgn0020767	Spred	569.963	0.463326	0.161409	2.87051	0.00409806	0.0106664	0.31288	0.163696	1.91134	0.0559604	0.202598
FBgn0020880	CG7179	0.7393	-2.41664	3.42913	-0.704738	0.480973	NA	-3.1199	3.42919	-0.909805	0.362925	NA
FBgn0020887	Su(z)12	465.728	0.322213	0.144429	2.23094	0.0256849	0.0545228	0.140293	0.148612	0.94402	0.345159	0.633179
FBgn0020906	Jon25Bi	7879.6	-2.25858	0.440632	-5.12578	2.96314e-07	1.50004e-06	-1.27545	0.440589	-2.89488	0.00379305	0.02594
FBgn0020907	Scp2	75.4942	-2.19136	0.329818	-6.64414	3.04991e-11	2.33932e-10	-1.06704	0.320374	-3.3306	0.000866579	0.0079983
FBgn0020908	Scp1	8.07816	-0.109504	0.954709	-0.114699	0.908684	0.940726	-0.531316	1.0062	-0.528043	0.597469	NA
FBgn0020909	Rtc1	398.792	0.332665	0.159251	2.08894	0.0367128	0.0741884	-0.11314	0.165333	-0.684318	0.493774	0.757695
FBgn0020910	RpL3	50478	-1.20725	0.120903	-9.98522	1.76909e-23	2.9751e-22	-0.379927	0.120899	-3.14253	0.00167495	0.013399
FBgn0020912	Ptx1	1780.61	-0.436924	0.192774	-2.26651	0.0234203	0.0501767	-0.0540426	0.193115	-0.279846	0.779595	0.921353
FBgn0020930	Dgkepsilon	164.526	0.00409634	0.223138	0.0183579	0.985353	0.991075	-0.0717125	0.230459	-0.311172	0.75567	0.909823
FBgn0021738	Crg-1	0.707552	0.65139	3.67197	0.177395	0.859198	NA	2.97287	3.477	0.85501	0.392546	NA
FBgn0021742	C901	0	NA	NA	NA	NA	NA	NA	NA	NA	NA	NA
FBgn0021750	SerRS-m	267.926	0.46737	0.18236	2.5629	0.0103803	0.0244354	-0.190832	0.191699	-0.995475	0.319505	0.609685
FBgn0021760	chb	1275.96	0.0199171	0.135952	0.146501	0.883526	0.921658	0.109854	0.137169	0.800864	0.423211	0.70271
FBgn0021761	Nup154	659.784	0.459388	0.151451	3.03324	0.0024194	0.00662055	-0.0302329	0.155416	-0.194529	0.845762	0.948268
FBgn0021764	sdk	407.275	0.109298	0.159161	0.686713	0.492264	0.603598	0.499042	0.160856	3.10241	0.00191955	0.0150239
FBgn0021765	scu	1449.85	-0.50953	0.16625	-3.06484	0.00217788	0.00600071	-0.403217	0.167215	-2.41137	0.0158927	0.0796427
FBgn0021767	org-1	103.229	2.49969	0.407474	6.13459	8.53799e-10	5.73967e-09	-0.00864626	0.439234	-0.0196849	0.984295	0.997092
FBgn0021768	nudC	1086.21	0.133606	0.113168	1.1806	0.237763	0.345507	-0.720058	0.117975	-6.10349	1.03776e-09	5.64053e-08
FBgn0021776	mira	678.695	-1.76236	0.146851	-12.001	3.51087e-33	9.35601e-32	-0.223015	0.142921	-1.56041	0.118664	0.340514
FBgn0021795	Tapdelta	3455.7	-1.42539	0.146557	-9.72582	2.34023e-22	3.64648e-21	-0.955538	0.146804	-6.50894	7.56826e-11	5.42566e-09
FBgn0021796	Tor	952.138	-0.178204	0.141029	-1.2636	0.206374	0.308256	0.0525883	0.142311	0.36953	0.711732	0.889238
FBgn0021800	Reph	242.257	0.523738	0.247226	2.11846	0.0341359	0.0697139	0.0340834	0.253547	0.134427	0.893065	0.96757
FBgn0021814	Vps28	742.471	0.883765	0.162572	5.43616	5.44417e-08	2.98897e-07	0.23833	0.165976	1.43594	0.15102	0.394239
FBgn0021818	cnk	564.804	-0.165334	0.143116	-1.15524	0.247992	0.356977	0.0207323	0.145396	0.142592	0.886612	0.965046
FBgn0021825	DCTN2-p50	1511.18	0.168734	0.113005	1.49316	0.135396	0.219356	0.0299757	0.11468	0.261385	0.793795	0.926852
FBgn0021847	l(2)k14710	893.519	-0.122047	0.123914	-0.984934	0.324656	0.439614	-0.0194719	0.125832	-0.154745	0.877022	0.960911
FBgn0021856	l(2)k14505	665.359	0.0930213	0.144289	0.644687	0.51913	0.62802	-0.0352519	0.147269	-0.239371	0.810818	0.93403
FBgn0021872	Xbp1	12712.6	-0.373868	0.116258	-3.21586	0.00130056	0.00375047	-0.000563991	0.116342	-0.0048477	0.996132	0.998895
FBgn0021874	Nle	655.56	0.212313	0.181233	1.17149	0.241401	0.349352	-0.289454	0.184772	-1.56655	0.117221	0.337537
FBgn0021875	Zfrp8	301.628	0.561584	0.192844	2.91212	0.00358989	0.00949116	-0.104149	0.200512	-0.519417	0.60347	0.826493
FBgn0021895	ytr	1211.93	0.285344	0.115385	2.47298	0.0133993	0.0307145	-0.178739	0.118179	-1.51244	0.130422	0.359134
FBgn0021906	RFeSP	4284.48	-0.756823	0.152903	-4.94969	7.43327e-07	3.54538e-06	-0.0858847	0.152948	-0.561528	0.574438	0.809303
FBgn0021944	Coprox	1695.75	0.287414	0.107066	2.68446	0.00726461	0.0178616	-0.0528667	0.10899	-0.48506	0.627634	0.839972
FBgn0021967	ND-PDSW	2726.77	-1.01009	0.157665	-6.40659	1.48808e-10	1.06806e-09	-0.23462	0.157634	-1.48838	0.13665	0.370037
FBgn0021979	l(2)k09913	3970.68	-0.993716	0.178908	-5.55433	2.78678e-08	1.57923e-07	0.169213	0.178723	0.946789	0.343746	0.632153
FBgn0021995	Rs1	898.002	0.0603854	0.175847	0.343398	0.731299	0.809327	-0.122329	0.1778	-0.688013	0.491444	0.756476
FBgn0022023	eIF3h	4284.91	-0.774039	0.0985186	-7.85678	3.94137e-15	4.07588e-14	-0.150237	0.0986122	-1.52352	0.12763	0.354854
FBgn0022027	Vps25	488.803	0.125718	0.164795	0.762874	0.445538	0.559981	-0.0230174	0.168401	-0.136683	0.891282	0.967285
FBgn0022029	l(2)k01209	926.363	1.79841	0.144364	12.4574	1.27383e-35	3.78256e-34	0.326656	0.149873	2.17955	0.0292908	0.126723
FBgn0022069	Nnp-1	811.495	0.206131	0.168635	1.22235	0.221575	0.326549	-0.325381	0.171777	-1.89421	0.0581975	0.20898
FBgn0022097	Vha36-1	12164.9	-0.875578	0.108344	-8.08143	6.40098e-16	7.04718e-15	0.172086	0.108255	1.58963	0.111917	0.32785
FBgn0022153	l(2)k05819	1249.12	-0.274581	0.132318	-2.07516	0.0379718	0.076466	0.20297	0.13286	1.52769	0.126588	0.35314
FBgn0022160	Gpo-1	6775.46	-0.175904	0.151994	-1.15731	0.247145	0.356153	-0.470582	0.15236	-3.08861	0.00201092	0.0155851
FBgn0022213	Cse1	1242.77	1.56916	0.122891	12.7687	2.45227e-37	7.91505e-36	0.0622301	0.127804	0.486918	0.626316	0.839801
FBgn0022224	ubl	220.933	-0.217968	0.199684	-1.09156	0.275025	0.387361	-0.339545	0.20646	-1.64461	0.100051	0.305667
FBgn0022238	lolal	1233.52	0.121733	0.132495	0.918776	0.358213	0.473773	0.223107	0.133732	1.66831	0.0952538	0.29474
FBgn0022288	l(2)09851	893.791	-0.0986364	0.158741	-0.621367	0.534358	0.641514	-0.422856	0.161411	-2.61975	0.0087994	0.0498133
FBgn0022338	dnk	391.611	2.0963	0.188394	11.1272	9.24674e-29	1.99381e-27	0.0029727	0.202452	0.0146834	0.988285	0.997092
FBgn0022343	CG3760	1906.46	-0.553882	0.114166	-4.85157	1.22491e-06	5.67059e-06	-0.413714	0.115204	-3.59113	0.000329245	0.0036095
FBgn0022344	CG10340	991.374	-0.746058	0.127883	-5.83393	5.41373e-09	3.3352e-08	-0.511072	0.129416	-3.94907	7.84546e-05	0.0010678
FBgn0022349	CG1910	1701.24	-0.163467	0.107286	-1.52365	0.127597	0.20943	0.187359	0.107946	1.73568	0.0826212	0.267138
FBgn0022355	Tsf1	111.245	0.74446	0.308176	2.4157	0.0157051	0.0354216	0.331453	0.318059	1.04211	0.29736	0.585982
FBgn0022359	Sodh-2	213.55	5.1711	0.363539	14.2243	6.47305e-46	2.91231e-44	3.13101	0.375098	8.34719	6.99047e-17	1.26376e-14
FBgn0022361	Pur-alpha	957.518	-0.692171	0.138324	-5.00398	5.61575e-07	2.73883e-06	-0.161114	0.138648	-1.16203	0.245222	0.52858
FBgn0022382	Pka-R2	2073.33	-0.383087	0.11328	-3.38176	0.000720234	0.00217725	0.0554224	0.113464	0.488458	0.625226	0.839286
FBgn0022699	D19B	288.195	-0.178782	0.172812	-1.03454	0.300882	0.414565	0.0664021	0.176062	0.377151	0.706061	0.88628
FBgn0022700	Cht4	1549.55	4.74564	0.670563	7.07709	1.47212e-12	1.26028e-11	0.478063	0.674525	0.708739	0.478486	0.746967
FBgn0022702	Cht2	16.5842	2.16786	0.720785	3.00763	0.00263291	0.00715021	-0.613819	0.859022	-0.714556	0.474884	NA
FBgn0022709	Adk1	212.324	-0.939168	0.198518	-4.7309	2.23527e-06	9.97903e-06	-0.148788	0.198051	-0.751259	0.452497	0.726328
FBgn0022710	Ac13E	1266.52	-1.29921	0.173946	-7.46901	8.07993e-14	7.57211e-13	-0.0099655	0.172837	-0.0576586	0.954021	0.988369
FBgn0022724	Taf8	127.946	1.06078	0.261008	4.06417	4.82036e-05	0.000177968	-0.258712	0.281763	-0.918193	0.358518	0.646195
FBgn0022740	HLH54F	10.7161	0.0491818	0.778265	0.0631942	0.949612	0.966916	-0.539622	0.834015	-0.647017	0.517621	NA
FBgn0022764	Sin3A	2255.23	-0.27171	0.163641	-1.6604	0.0968331	0.166556	-0.0858301	0.164164	-0.522831	0.601092	0.825955
FBgn0022768	Pp2C1	557.671	0.193848	0.170782	1.13506	0.25635	0.366493	0.289494	0.172788	1.67543	0.0938499	0.292119
FBgn0022770	Peritrophin-A	5.09014	-1.29541	1.13278	-1.14357	0.252804	0.362498	-0.630827	1.14695	-0.550002	0.582318	NA
FBgn0022772	Orc1	74.6612	1.89908	0.413171	4.59636	4.29932e-06	1.84564e-05	-0.441571	0.454055	-0.972506	0.330799	0.621262
FBgn0022774	Oat	76.1272	1.37237	0.319825	4.291	1.77869e-05	7.01021e-05	-0.178538	0.351736	-0.507591	0.61174	0.830975
FBgn0022786	Hira	353.543	0.594418	0.172524	3.44543	0.000570151	0.00175469	-0.246581	0.18115	-1.3612	0.173451	0.43277
FBgn0022787	Hel89B	872.568	-0.0402018	0.186142	-0.215974	0.829008	0.881239	0.075853	0.187417	0.40473	0.685676	0.874368
FBgn0022800	Cad96Ca	6.37648	-0.438705	1.00303	-0.43738	0.661836	0.751416	-0.630291	1.05709	-0.596254	0.551006	NA
FBgn0022893	Df31	1440.21	0.706587	0.116342	6.07334	1.25273e-09	8.2612e-09	0.0364883	0.118952	0.306749	0.759034	0.911373
FBgn0022935	D19A	392.746	0.0901885	0.171041	0.527291	0.597992	0.697914	0.0257013	0.174869	0.146975	0.883152	0.96424
FBgn0022936	CycH	140.46	1.08253	0.237719	4.55383	5.26772e-06	2.24007e-05	0.193169	0.252536	0.764918	0.44432	0.721392
FBgn0022942	Cbp80	783.95	0.258009	0.134446	1.91905	0.0549777	0.104995	0.0110995	0.137459	0.0807474	0.935643	0.982053
FBgn0022943	Cbp20	204.005	-0.00571458	0.235944	-0.0242201	0.980677	0.987805	-0.104091	0.24169	-0.43068	0.666701	0.864
FBgn0022959	yps	3295.27	-0.33508	0.104528	-3.20565	0.00134756	0.00387324	-0.570688	0.105671	-5.40062	6.64106e-08	2.25416e-06
FBgn0022960	vimar	485.523	0.607465	0.158499	3.8326	0.000126794	0.000437362	0.131338	0.163309	0.804231	0.421264	0.701347
FBgn0022981	rpk	5.10419	-2.17064	1.31506	-1.6506	0.0988201	0.169338	-0.437964	1.23394	-0.354932	0.72264	NA
FBgn0022984	qkr58E-3	638.579	-0.701473	0.151149	-4.64095	3.46808e-06	1.51064e-05	0.0669299	0.151097	0.442959	0.657796	0.859153
FBgn0022985	qkr58E-2	704.105	0.0751705	0.138896	0.5412	0.58837	0.690094	-0.0199076	0.141578	-0.140613	0.888176	0.965839
FBgn0022986	qkr58E-1	308.777	0.266112	0.176476	1.50792	0.131574	0.214805	0.35562	0.179912	1.97664	0.0480827	0.182666
FBgn0022987	qkr54B	304.726	0.228771	0.192036	1.1913	0.233537	0.340653	0.0219624	0.19624	0.111916	0.91089	0.97222
FBgn0023000	mth	317.499	-0.180144	0.243677	-0.739274	0.459741	0.573531	0.0657035	0.245988	0.267101	0.789392	0.924825
FBgn0023001	melt	509.925	-0.0341868	0.148279	-0.230557	0.817659	0.873554	0.134272	0.150682	0.891092	0.37288	0.656186
FBgn0023023	CRMP	141.173	-0.274685	0.303211	-0.905919	0.364979	0.480398	-1.27839	0.320734	-3.98583	6.72459e-05	0.000940101
FBgn0023076	Clk	500.772	-0.422843	0.162582	-2.60081	0.00930046	0.0222308	-0.417246	0.16607	-2.51247	0.0119888	0.0633411
FBgn0023081	gek	302.774	-0.296096	0.16978	-1.74399	0.0811602	0.144757	0.0492741	0.1724	0.285812	0.775022	0.918888
FBgn0023083	fray	1878.43	0.513012	0.133408	3.84543	0.000120339	0.000417172	0.491011	0.1343	3.65608	0.000256106	0.0029221
FBgn0023090	dtr	0.234701	1.64647	4.89189	0.336571	0.73644	NA	0	4.99745	0	1	NA
FBgn0023091	dimm	20.254	0.759819	0.627086	1.21167	0.22564	0.331319	0.157998	0.6581	0.240083	0.810266	NA
FBgn0023094	cyc	659.198	0.710643	0.160557	4.4261	9.59519e-06	3.93539e-05	0.025189	0.164782	0.152862	0.878507	0.961778
FBgn0023095	caps	1695.96	0.190036	0.122902	1.54624	0.122046	0.201689	0.380532	0.123684	3.07665	0.00209343	0.0160304
FBgn0023096	btv	25.1627	1.18052	0.629089	1.87656	0.060578	0.113844	-0.280429	0.676871	-0.414301	0.678653	0.870871
FBgn0023097	bon	442.038	0.51174	0.190727	2.6831	0.00729425	0.0179133	0.000275886	0.195363	0.00141217	0.998873	1
FBgn0023129	aay	2430.36	-2.1929	0.245074	-8.94788	3.6238e-19	4.76133e-18	-1.17397	0.244794	-4.79573	1.62087e-06	3.94127e-05
FBgn0023130	a6	125.54	-0.112608	0.242313	-0.464723	0.64213	0.735582	-0.218268	0.251552	-0.867687	0.385566	0.667487
FBgn0023143	Uba1	4826.69	0.888889	0.116679	7.61826	2.5711e-14	2.52565e-13	0.358952	0.117358	3.0586	0.00222375	0.0168575
FBgn0023167	SmD3	575.112	0.392145	0.151921	2.58125	0.0098444	0.0233484	0.0723543	0.155684	0.46475	0.642111	0.848934
FBgn0023169	AMPKalpha	2895.4	-0.676637	0.112251	-6.02787	1.66131e-09	1.08523e-08	0.297735	0.111995	2.65847	0.00784955	0.0454564
FBgn0023170	RpL39	17048.8	-1.40697	0.10054	-13.9941	1.69378e-44	7.21453e-43	-0.614631	0.100525	-6.11419	9.70469e-10	5.34465e-08
FBgn0023171	rnh1	521.302	-1.212	0.147002	-8.24477	1.65479e-16	1.87959e-15	-0.381065	0.146571	-2.59988	0.00932575	0.0520489
FBgn0023172	RhoGEF2	3275.3	0.306732	0.123675	2.48015	0.0131327	0.0301831	0.378206	0.124212	3.04484	0.00232807	0.0175206
FBgn0023174	Prosbeta2	2363.6	-0.0954308	0.0954975	-0.999302	0.317648	0.432393	0.135537	0.0962414	1.40831	0.15904	0.407575
FBgn0023175	Prosalpha7	1860.66	0.011324	0.119056	0.0951157	0.924223	0.951297	0.038435	0.120098	0.32003	0.748946	0.906763
FBgn0023177	Pp4-19C	743.851	0.271556	0.152889	1.77617	0.0757055	0.136765	0.31753	0.154762	2.05173	0.0401957	0.159403
FBgn0023178	Pdf	0.196233	-2.22791	4.99472	-0.446054	0.655558	NA	-1.49472	4.99472	-0.299259	0.764742	NA
FBgn0023179	amon	267.528	-1.4053	0.201255	-6.9827	2.89562e-12	2.43087e-11	-0.0294259	0.19596	-0.150163	0.880636	0.963169
FBgn0023180	Orc6	49.852	0.67706	0.376675	1.79746	0.0722622	0.13162	0.449409	0.391681	1.14738	0.251223	0.534735
FBgn0023181	Orc4	60.9502	0.994836	0.387459	2.56759	0.0102408	0.0241617	0.0150444	0.410372	0.0366604	0.970756	0.992355
FBgn0023197	Jon74E	48668.4	-3.62049	0.139048	-26.0376	1.85777e-149	6.22831e-147	-0.0131346	0.138656	-0.0947279	0.924531	0.976775
FBgn0023212	EloB	1254.64	-0.260837	0.109107	-2.39065	0.0168184	0.0375417	-0.0836666	0.110481	-0.757291	0.448875	0.724691
FBgn0023213	eIF4G1	10641.4	-0.813373	0.122007	-6.6666	2.618e-11	2.02447e-10	0.0492386	0.12197	0.403695	0.686437	0.874368
FBgn0023214	edl	138.543	1.54693	0.276565	5.59337	2.22698e-08	1.27732e-07	1.10178	0.284666	3.87042	0.000108646	0.0014206
FBgn0023215	Mnt	773.87	0.674776	0.149372	4.51743	6.25937e-06	2.63572e-05	0.52966	0.151613	3.49351	0.000476714	0.00491245
FBgn0023216	Parg	221.163	0.0853748	0.189133	0.451401	0.651701	0.743238	0.200341	0.193853	1.03347	0.301383	0.589995
FBgn0023388	Dap160	1210.94	0.8974	0.142966	6.27701	3.45154e-10	2.40912e-09	0.118406	0.145634	0.813037	0.416197	0.696397
FBgn0023395	Chd3	35.1715	1.10645	0.506222	2.1857	0.0288374	0.0603397	0.515993	0.527819	0.977593	0.328275	0.618893
FBgn0023407	B4	604.99	0.546187	0.159658	3.42099	0.000623931	0.00190497	0.509282	0.162044	3.14286	0.00167308	0.013399
FBgn0023415	Acp32CD	1.45052	-1.81089	2.02594	-0.89385	0.371402	0.487187	-1.07359	2.02594	-0.529921	0.596167	NA
FBgn0023416	Ac3	39.0308	1.89994	0.528408	3.59559	0.000323663	0.0010379	0.993926	0.551933	1.80081	0.0717326	0.241607
FBgn0023441	fus	879.742	-1.09187	0.138691	-7.87272	3.46999e-15	3.60276e-14	-0.152798	0.13826	-1.10515	0.269095	0.555438
FBgn0023458	Rbcn-3A	4272.44	-0.355269	0.143727	-2.47184	0.0134421	0.0308057	0.0958994	0.143884	0.666506	0.505088	0.763763
FBgn0023477	Taldo	3268.98	-0.506778	0.189424	-2.67537	0.00746468	0.018288	-0.517352	0.189883	-2.72458	0.0064383	0.0392241
FBgn0023479	teq	68.466	-0.64408	0.37439	-1.72035	0.0853697	0.150816	-0.533464	0.382267	-1.39552	0.162858	0.41442
FBgn0023489	Pph13	1.05194	3.81112	3.47339	1.09724	0.272538	NA	0	3.73019	0	1	NA
FBgn0023495	Lip3	62.1597	0.637936	0.364792	1.74877	0.0803314	0.143451	-2.55722	0.480135	-5.32604	1.00375e-07	3.26061e-06
FBgn0023496	Lip1	45.3973	-2.53327	0.527747	-4.80015	1.58547e-06	7.24617e-06	-0.183312	0.486723	-0.376625	0.706452	0.88637
FBgn0023506	Es2	313.843	1.67167	0.196968	8.48698	2.12073e-17	2.49895e-16	0.304477	0.207664	1.4662	0.142593	0.381164
FBgn0023507	D2hgdh	3568.27	-0.73661	0.181678	-4.05449	5.02442e-05	0.000184911	0.0328401	0.181655	0.180783	0.856538	0.952014
FBgn0023508	Ocrl	1025.63	0.423308	0.113812	3.71935	0.000199738	0.000665133	0.114852	0.11662	0.984841	0.324702	0.615646
FBgn0023509	mip130	370.664	0.254964	0.17624	1.44669	0.147984	0.23639	0.390862	0.179002	2.18356	0.0289948	0.125846
FBgn0023510	Rbcn-3B	2099.13	-0.292349	0.136119	-2.14775	0.0317338	0.0655164	0.191147	0.136372	1.40166	0.161018	0.410619
FBgn0023511	Edem1	558.1	-0.285762	0.136802	-2.08887	0.0367194	0.0741884	-0.0362729	0.139017	-0.260924	0.794151	0.92703
FBgn0023512	eIF2Bepsilon	527.03	0.401258	0.139551	2.87535	0.00403577	0.0105201	0.0205562	0.144291	0.142463	0.886714	0.965046
FBgn0023513	CG14803	92.5159	0.805499	0.302987	2.65852	0.00784837	0.019134	0.59017	0.312713	1.88726	0.059126	0.211571
FBgn0023514	CG14805	639.983	0.220186	0.135904	1.62015	0.105199	0.178446	0.24123	0.1385	1.74173	0.0815565	0.265035
FBgn0023515	CG14814	65.2332	0.318109	0.350001	0.90888	0.363413	0.478823	0.496764	0.357556	1.38933	0.164731	0.418291
FBgn0023516	Pex5	866.583	-0.958638	0.132075	-7.2583	3.91997e-13	3.47317e-12	-0.056263	0.131523	-0.42778	0.668811	0.864982
FBgn0023517	Pgam5	286.204	0.488913	0.179738	2.72015	0.0065253	0.0162126	-0.0548332	0.187647	-0.292215	0.770123	0.9166
FBgn0023518	trr	562.287	0.240463	0.167662	1.43421	0.151512	0.240702	0.0734188	0.170705	0.430092	0.667129	0.864144
FBgn0023519	mRpL16	431.124	0.133925	0.150748	0.888403	0.374324	0.489845	-0.308353	0.156933	-1.96487	0.0494289	0.186321
FBgn0023520	CG3857	162.406	0.548587	0.223284	2.4569	0.014014	0.0319684	-0.011517	0.234497	-0.0491136	0.960829	0.989375
FBgn0023521	CG3587	253.378	0.406487	0.191662	2.12085	0.0339342	0.0693157	-0.059224	0.199583	-0.296739	0.766666	0.91485
FBgn0023522	CG11596	407.009	-0.0967735	0.161653	-0.598649	0.549407	0.654515	-0.00125441	0.165212	-0.00759275	0.993942	0.998025
FBgn0023523	Or2a	2.80116	1.19515	1.54272	0.774708	0.438512	0.552754	0.379379	1.64888	0.230083	0.818027	NA
FBgn0023524	CG3078	4.76457	1.0078	1.37038	0.735419	0.462085	0.575626	-1.93859	1.69063	-1.14666	0.251521	NA
FBgn0023525	CG3191	227.731	-1.11018	0.220526	-5.03423	4.79769e-07	2.37101e-06	-0.286131	0.219739	-1.30214	0.192868	0.459172
FBgn0023526	CG2865	810.572	0.0838567	0.287523	0.291652	0.770553	0.839802	-0.118369	0.288637	-0.410095	0.681736	0.872338
FBgn0023527	CG3071	789.737	-0.346534	0.136683	-2.53531	0.0112349	0.0262039	-0.348291	0.13912	-2.50353	0.0122961	0.0648002
FBgn0023528	CG2924	795.172	0.178358	0.13568	1.31455	0.188661	0.287622	0.378057	0.1372	2.75551	0.00586008	0.0363946
FBgn0023529	CG2918	8187.36	-1.56184	0.105896	-14.7489	3.1278e-49	1.49116e-47	-1.11937	0.106072	-10.553	4.92095e-26	3.41022e-23
FBgn0023530	CG3740	608.408	0.0151461	0.173931	0.0870811	0.930607	0.955006	0.243209	0.175422	1.38642	0.165618	0.419609
FBgn0023531	CG32809	132.183	-0.378752	0.245964	-1.53987	0.123593	0.203759	-0.161578	0.250789	-0.644282	0.519393	0.773231
FBgn0023534	CG17778	126.225	0.157272	0.291243	0.540004	0.589194	0.690791	0.531934	0.294564	1.80584	0.0709439	0.240118
FBgn0023535	arg	17.5218	0.383894	0.657659	0.583728	0.559404	0.662928	-0.6201	0.711374	-0.871693	0.383376	NA
FBgn0023536	CG3156	272.279	0.0540457	0.187731	0.287889	0.773432	0.84127	-0.242702	0.194586	-1.24727	0.212297	0.487562
FBgn0023537	CG17896	3351.85	-0.526045	0.165216	-3.18399	0.00145258	0.00414175	-0.726577	0.165883	-4.38007	1.18644e-05	0.000217802
FBgn0023540	CG3630	21.0696	-0.908039	0.650976	-1.39489	0.16305	0.255669	0.863764	0.617874	1.39796	0.162125	0.412934
FBgn0023541	Cyp4d14	3899.43	-3.56871	0.154084	-23.1608	1.13033e-118	2.25915e-116	-0.253526	0.150259	-1.68725	0.0915548	0.287147
FBgn0023542	Nmd3	1491.51	-0.139229	0.155944	-0.892816	0.371956	0.487732	-0.0510035	0.156903	-0.325064	0.745133	0.905827
FBgn0023545	PIG-K	574.153	0.0550588	0.144674	0.380572	0.703521	0.786711	0.0697778	0.147488	0.473107	0.636137	0.844931
FBgn0023549	Mct1	3644.26	-1.29169	0.126433	-10.2164	1.6739e-24	2.97892e-23	-0.305009	0.126212	-2.41664	0.0156645	0.078663
FBgn0023550	FarO	98.2648	-2.28032	0.286876	-7.94879	1.88337e-15	1.9953e-14	-0.822227	0.272017	-3.02271	0.00250523	0.0185352
FBgn0024150	Ac78C	112.017	-0.137435	0.267295	-0.51417	0.607133	0.705415	0.578205	0.270018	2.14136	0.0322452	0.135704
FBgn0024177	zpg	4.87389	-3.8254	1.59286	-2.4016	0.0163236	0.0366181	-1.27996	1.33993	-0.955239	0.339457	NA
FBgn0024179	wit	1073.85	-1.51993	0.201152	-7.55616	4.15155e-14	3.98771e-13	0.179191	0.199194	0.899583	0.368342	0.652841
FBgn0024182	waw	620.365	0.128596	0.157778	0.815041	0.415049	0.529927	-0.430936	0.162406	-2.65345	0.00796747	0.0460122
FBgn0024183	vig	3351.59	0.198104	0.130826	1.51425	0.129963	0.212575	-0.178908	0.131599	-1.35949	0.17399	0.433334
FBgn0024184	unc-4	1.83841	3.02929	2.49469	1.21429	0.224637	0.33032	-1.49337	2.85591	-0.522907	0.601039	NA
FBgn0024187	syd	1633.73	-0.725699	0.11935	-6.08043	1.19857e-09	7.9191e-09	-0.0406867	0.119474	-0.340548	0.733444	0.898629
FBgn0024188	san	666.77	-0.0194846	0.143265	-0.136004	0.891818	0.928073	-0.0975629	0.146117	-0.667704	0.504323	0.763091
FBgn0024189	sns	5.16173	-0.978111	1.20091	-0.814474	0.415373	0.530255	0.352446	1.16329	0.302973	0.761911	NA
FBgn0024191	sip1	148.521	0.558735	0.235475	2.3728	0.0176538	0.0391124	0.534745	0.241845	2.2111	0.0270286	0.119558
FBgn0024194	rasp	429.189	-0.0426522	0.161877	-0.263485	0.792177	0.855031	-0.0517748	0.165468	-0.312899	0.754357	0.909169
FBgn0024196	robl	1142.85	0.145635	0.125865	1.15707	0.247244	0.356197	-0.250908	0.128533	-1.95209	0.0509276	0.190944
FBgn0024222	IKKbeta	357.811	0.376665	0.177184	2.12584	0.0335162	0.0685426	0.121477	0.182026	0.667361	0.504542	0.763283
FBgn0024227	aurB	37.4575	1.84765	0.462028	3.999	6.36097e-05	0.000229786	0.813143	0.491141	1.65562	0.0977987	0.300774
FBgn0024230	Hs2st	185.059	0.072076	0.205293	0.351088	0.725523	0.803962	-0.0320611	0.212466	-0.1509	0.880055	0.962839
FBgn0024232	gprs	0.76714	1.08214	3.39551	0.318697	0.749956	NA	-1.76355	3.63234	-0.485513	0.627312	NA
FBgn0024234	gbb	263.143	0.123985	0.198438	0.624803	0.5321	0.639616	-0.109046	0.204586	-0.533008	0.594028	0.820831
FBgn0024236	foi	1359.65	-0.359051	0.126453	-2.8394	0.00451985	0.0116534	0.0183944	0.127203	0.144607	0.885021	0.96454
FBgn0024238	Fim	14446	0.512538	0.131683	3.8922	9.93395e-05	0.000348796	0.255069	0.131841	1.93467	0.0530306	0.195914
FBgn0024244	drm	754.286	0.452289	0.135817	3.33013	0.000868058	0.00257764	-0.0100513	0.139516	-0.0720442	0.942567	0.984604
FBgn0024245	dnt	51.2244	0.301387	0.370955	0.812461	0.416527	0.531227	-0.117069	0.39055	-0.299756	0.764364	0.913929
FBgn0024248	chico	926.349	-0.256199	0.132001	-1.94088	0.0522723	0.100437	0.0756016	0.133196	0.567596	0.570309	0.807669
FBgn0024249	cato	0.233854	1.64172	4.89224	0.335577	0.73719	NA	0	4.99745	0	1	NA
FBgn0024250	brk	295.562	0.0841319	0.308557	0.272662	0.785113	0.850144	0.650112	0.309101	2.10324	0.0354452	0.145346
FBgn0024251	bbx	826.114	0.0110753	0.179924	0.0615556	0.950917	0.967603	0.0383545	0.181501	0.211319	0.832639	0.943612
FBgn0024273	WASp	3041.76	0.437443	0.142951	3.0601	0.00221266	0.00608525	0.258805	0.143583	1.80248	0.0714699	0.241015
FBgn0024277	trio	3327	0.373043	0.110488	3.37631	0.000734659	0.00221506	0.304657	0.111156	2.74081	0.00612889	0.0376424
FBgn0024285	Srp54	1048.84	0.976683	0.127329	7.67053	1.71292e-14	1.70521e-13	0.190005	0.130806	1.45257	0.146344	0.387455
FBgn0024288	Sox100B	454.11	0.414139	0.1729	2.39526	0.0166088	0.0371454	0.242125	0.176423	1.37241	0.169935	0.426813
FBgn0024289	Sodh-1	515.538	-0.820623	0.213509	-3.84351	0.000121286	0.000420037	-0.212262	0.213959	-0.992068	0.321164	0.611868
FBgn0024291	Sirt1	1445.11	0.243993	0.139122	1.75381	0.0794629	0.142206	0.249507	0.140246	1.77906	0.0752292	0.250142
FBgn0024293	Spn43Ab	61.3452	-1.84175	0.419235	-4.39311	1.11739e-05	4.55031e-05	-0.229723	0.402707	-0.570448	0.568374	0.806804
FBgn0024294	Spn43Aa	3.42098	0.67753	1.35816	0.498859	0.617879	0.714068	-0.414274	1.49122	-0.277808	0.78116	NA
FBgn0024314	Plap	902.845	0.598869	0.119072	5.02948	4.91824e-07	2.42482e-06	0.026682	0.122896	0.217109	0.828123	0.942235
FBgn0024315	Picot	8487.53	-1.49544	0.183481	-8.15039	3.62754e-16	4.04952e-15	-0.410456	0.183379	-2.23829	0.0252023	0.113533
FBgn0024319	Nach	8.05127	0.739364	0.929655	0.795311	0.426433	0.540956	0.437193	0.970862	0.450315	0.652484	NA
FBgn0024320	Npc1a	682.875	-0.289922	0.146496	-1.97905	0.0478102	0.0930857	0.295592	0.14711	2.00932	0.0445032	0.172172
FBgn0024321	NK7.1	1002.33	2.64997	0.173969	15.2324	2.15543e-52	1.1257e-50	0.0126756	0.182197	0.0695706	0.944535	0.985303
FBgn0024326	Mkk4	1653.2	0.832501	0.12031	6.91961	4.52888e-12	3.75049e-11	0.193487	0.122405	1.58071	0.113945	0.331512
FBgn0024329	Mekk1	1499.9	1.21823	0.127486	9.55581	1.22616e-21	1.83359e-20	0.353354	0.130019	2.71771	0.00657359	0.0396705
FBgn0024330	MED6	192.873	0.257658	0.219962	1.17138	0.241448	0.349352	0.112633	0.226361	0.49758	0.61878	0.835039
FBgn0024352	Stip1	3350.2	0.276955	0.115311	2.40181	0.0163141	0.0366046	-0.28939	0.116465	-2.48478	0.0129633	0.0675035
FBgn0024360	MTPAP	912.695	2.57528	0.156189	16.4882	4.45955e-61	2.82611e-59	0.266489	0.163784	1.62707	0.103721	0.312517
FBgn0024361	Tsp2A	6776.53	0.555959	0.0951228	5.84464	5.07651e-09	3.14798e-08	0.37761	0.0955474	3.95207	7.74787e-05	0.00105798
FBgn0024362	Naa30A	1108.78	-0.055887	0.115692	-0.483067	0.629048	0.723955	-0.0898266	0.117702	-0.763168	0.445363	0.721676
FBgn0024364	CG11417	505.631	0.348112	0.176001	1.9779	0.04794	0.0933209	-0.165763	0.180645	-0.917615	0.35882	0.646289
FBgn0024365	CG12773	2945.69	-0.0564024	0.0941584	-0.599016	0.549162	0.654298	0.205076	0.094719	2.1651	0.0303801	0.130227
FBgn0024366	CG11409	16.0858	0.738296	0.705119	1.04705	0.295076	0.408298	0.127227	0.741807	0.171509	0.863823	NA
FBgn0024371	E2f2	308.803	0.405356	0.222348	1.82307	0.0682931	0.12575	0.0143776	0.227669	0.0631513	0.949646	0.987233
FBgn0024432	Dlc90F	2184	0.282208	0.12118	2.32883	0.0198683	0.0433897	-0.164009	0.12266	-1.3371	0.181189	0.443162
FBgn0024491	Bin1	551.552	1.35103	0.17898	7.54851	4.40274e-14	4.20954e-13	-0.406745	0.194832	-2.08767	0.0368273	0.149612
FBgn0024509	Sec13	2178.12	-0.592193	0.133607	-4.43234	9.32144e-06	3.83219e-05	-0.611518	0.134608	-4.54296	5.5471e-06	0.000114751
FBgn0024510	dlt	148.492	1.00841	0.233836	4.31247	1.61438e-05	6.40636e-05	0.235182	0.247016	0.952092	0.341051	0.629103
[truncated: 12,032 more rows]
